# Supplementary material for: Gut Mucosal Proteins and Bacteriome Are Shaped by the Saturation Index of Dietary Lipids
Source: Nutrients. 2019 Feb 16;11(2):418. doi: 10.3390/nu11020418 (PMC6412740; doi:10.3390/nu11020418)
Supplement: Supplementary file 1 [file nutrients-11-00418-s001.xlsx]

## Sheet: Figure S1
Figure S1. Body weights of mice exposed to low fat normal chow (NC), olive oil (OO), corn oil (CO) or anhydrous milk fat (AMF) for 5 weeks. There were no significant differences in weights at any time point.

## Sheet: Figure S2
Figure S2. Spearman rank correlation heatmap depicting correlations between selected host proteins and mucosal phyla. Colour indicates directionality (red = positive; blue = negative); cells outlined by a black box exceed the critical value (p < 0.05) using a two-tailed test.

## Sheet: Table S1
Table S2. All bacterial mucosal proteins identified by 1 or more peptides
			fold change from 'total protein'
Protein Name	Species	P value	Low fat	Milk fat	Olive oil	Corn oil
Cluster of ATP synthase subunit beta	Pedobacter antarcticus 4BY	0.17	-1.8466	0.0599	-0.0207	0.9158
Uncharacterized protein	Paenibacillus sp. IHB B 3415	0.007	0.85	1.7255	0.963	-0.7384
Molecular chaperone DnaK	Paenibacillus sp. IHB B 3415	0.001	-1.8801	-0.0473	0.0007	0.4241
Ubiquitin family	Ruminococcus albus 8	1	-0.1781	-0.2054	-0.0393	0.6459
Dihydroxy-acid dehydratase	Clostridium sp. D5	1	-0.0977	-0.2565	-0.2099	0.0693
Cluster of ATP synthase subunit alpha	Lactobacillus alimentarius DSM 20249	1	No data	No data	No data	No data
Uncharacterized protein (Fragment)	Paenibacillus sp. IHB B 3415	1	-0.8295	-0.1437	0.1425	0.2012
GDP-manne 4,6-dehydratase	Ruminococcus sp. 5_1_39BFAA	1	-0.3989	0.1891	-0.122	0.5311
Cluster of Chaperone protein DnaK	Alistipes sp. CAG:268	1	No data	No data	No data	No data
Cluster of 2,3-bisphphoglycerate-dependent phphoglycerate mutase	Sporolactobacillus inulinus CASD	1	No data	No data	No data	No data
Chaperone protein DnaK	Desulfotomaculum kuznetsovii	1	-0.0817	-0.5817	-0.3145	0.1603
Adenylate kinase	Melioribacter roseus (strain JCM 17771 / P3M-2)	1	No data	No data	No data	No data
Isocitrate dehydrogenase [NADP]	Paludibacter propionicigenes (strain DSM 17365 / JCM 13257 / WB4)	1	No data	No data	No data	No data
Triephphate isomerase	Phaeodactylibacter xiamenensis	1	No data	No data	No data	No data
Malate dehydrogenase	Streptococcus pneumoniae	1	-0.9028	0.0952	0.329	0.6681
Acyl-CoA dehydrogenase	Flavobacterium psychrophilum	1	No data	No data	No data	No data
Phphoglycerate kinase	Sphingobacterium sp. ML3W	1	No data	No data	No data	No data
Elongation factor Tu	Oscillibacter valericigenes (strain DSM 18026 / NBRC 101213 / Sjm18-20)	1	-1.4014	0.1932	0.0494	0.5722
Chaperone protein DnaK	Dialister invisus DSM 15470	1	-2.8426	-0.0169	-0.0214	0.7271
Elongation factor 1-alpha (Fragment)	Chionaspis lepineyi	1	No data	No data	No data	No data
Spore coat protein CotF	Paenibacillus sabinae T27	1	-0.578	0.0263	0.0436	0.0753
Succinyl-CoA ligase [ADP-forming] subunit alpha	Lysinibacillus sp. 13S34_air	1	No data	No data	No data	No data
Enolase	Clostridium saccharoperbutylacetonicum N1-4(HMT)	1	-0.6398	-0.4415	-0.3183	0.1846
ATPase AAA	Chlorobium sp. GBChlB	1	No data	No data	No data	No data
Uncharacterized protein	Paenibacillus sp. FSL R5-0345	1	-0.2916	-0.3443	-0.3976	0.119
S-layer domain protein	Paenibacillus amylolyticus	1	-2.9166	1.4074	0.2463	-0.0041
Uncharacterized protein	Prevotella timonensis S9-PR14	1	No data	No data	No data	No data
Pyruvate dehydrogenase	Pedobacter kyungheensis	1	No data	No data	No data	No data
60 kDa chaperonin	Firmicutes bacterium CAG:536	1	-3.2889	0.3623	0.2792	1.1513
Pseudouridine synthase	Paenibacillus dendritiformis C454	1	-0.0813	-0.3649	-0.0594	0.2371
Citrate synthase	Flavihumibacter petaseus NBRC 106054	1	No data	No data	No data	No data
3-hydroxy-2-methylbutyryl-CoA dehydrogenase	Runella slithyformis (strain ATCC 29530 / DSM 19594 / LMG 11500 / NCIMB 11436 / LSU 4)	1	No data	No data	No data	No data
RNA helicase	Nonlabens sp. YIK11	1	No data	No data	No data	No data
Glutamine--fructe-6-phphate aminotransferase [isomerizing]	Alloprevotella tannerae ATCC 51259	1	No data	No data	No data	No data
F5/8 type C domain protein	Prevotella sp. CAG:755	1	No data	No data	No data	No data
Starch-binding protein	Flavihumibacter sp. CACIAM 22H1	1	No data	No data	No data	No data
ATP synthase subunit b	Capnocytophaga haemolytica	1	No data	No data	No data	No data
Uncharacterized protein	Prevotella maculosa OT 289	1	No data	No data	No data	No data
Cluster of Chaperone protein HtpG	Melioribacter roseus (strain JCM 17771 / P3M-2)	1	No data	No data	No data	No data
Isocitrate dehydrogenase [NADP]	Cryomorphaceae bacterium BACL7 MAG-120910-bin2	1	No data	No data	No data	No data
DNA helicase	Dyadobacter sp. Leaf189	1	No data	No data	No data	No data
Endonuclease MutS2	Paenibacillus sp. FSL H7-0357	1	1.6267	-2.6563	-2.1913	-1.8104
Uncharacterized protein	Peptoniphilus sp. oral taxon 375 str. F0436	1	0.1888	-0.4696	-0.5628	0.0608
Putative tRNA (cytidine(34)-2'-O)-methyltransferase	Clostridium sp. CAG:780	1	1.4273	-1.3819	-1.3547	-1.253
TPR domain protein	Prevotella sp. CAG:1124	1	No data	No data	No data	No data
Putative glycolsyl hydrolase, family 18/alpha-rhamnidase	Prevotella ruminicola (strain ATCC 19189 / JCM 8958 / 23)	1	No data	No data	No data	No data
ATP-dependent zinc metalloprotease FtsH	Hymenobacter sp. APR13	1	No data	No data	No data	No data
GTPase HflX	Bacteroides pectinophilus CAG:437	1	No data	No data	No data	No data
Cell division protein FtsL	Chlorobi bacterium OLB6	1	No data	No data	No data	No data
Uncharacterized protein	Leadbetterella sp. JN14-9	1	No data	No data	No data	No data
Elongation factor Tu	Desulfotomaculum kuznetsovii (strain DSM 6115 / VKM B-1805 / 17)	1	-0.3651	-0.217	-0.0818	0.2764
Putative enoyl-CoA hydratase echA8	Virgibacillus sp. Vm-5	1	No data	No data	No data	No data
5-aminoimidazole-4-carboxamide ribonucleotide transformylase	Bacteroides dorei	1	No data	No data	No data	No data
DNA mismatch repair protein MutS	Bacteroides sp. HPS0048	1	No data	No data	No data	No data
3-ketoacyl-ACP reductase	Streptococcus pneumoniae	1	0.4447	-0.5831	-0.429	-0.5833
Cbxx/cfqx	Trichococcus palustris	1	-1.5222	0.182	0.275	1.1231
Acetyl-CoA acetyltransferase	Syntrophothermus lipocalidus (strain DSM 12680 / TGB-C1)	1	-1.3311	0.2501	0.222	0.7112
Type III restriction-modification system StyLTI enzyme res	Planococcus halocryophilus Or1	1	No data	No data	No data	No data
Uncharacterized protein	Leadbetterella sp. JN14-9	1	No data	No data	No data	No data
Cell cycle protein	Formosa agariphila KMM 3901	1	No data	No data	No data	No data
Protein tyrine phphatase	Roseivirga spongicola	1	No data	No data	No data	No data
Nucleotidyltransferase	Flavobacterium psychrophilum	1	No data	No data	No data	No data
DEAD-box ATP-dependent RNA helicase CshB	Bacillus thermotolerans	1	No data	No data	No data	No data
50S ribomal protein L9	Lactobacillus rapi DSM 19907	1	-0.5775	-0.2204	-0.1655	0.7936
Anti-FecI sigma factor, FecR	Mucilaginibacter paludis DSM 18603	1	No data	No data	No data	No data
Putative outer membrane protein probably involved in nutrient binding	Kordia algicida OT-1	1	No data	No data	No data	No data
Putative transmembrane protein	Bacteroides fragilis str. 3774 T13	1	No data	No data	No data	No data
Uncharacterized protein	Alloprevotella tannerae ATCC 51259	1	No data	No data	No data	No data
4Fe-4S ferredoxin iron-sulfur binding domain-containing protein	Bacteroides sp. CAG:702	1	No data	No data	No data	No data
Unknown protein for peptide #380240		1	No data	No data	No data	No data
Unknown decoy protein for peptide #797784		1	No data	No data	No data	No data
Uncharacterized protein	Zhouia amylolytica AD3	1	No data	No data	No data	No data
Uncharacterized protein	Faecalibacterium prausnitzii A2-165	1	-2.5634	0.2266	-0.064	1.2818
Uncharacterized protein	Ruminococcaceae bacterium D16	1	-2.3496	0.3206	0.7224	0.8397
Cell division ATP-binding protein FtsE	Firmicutes bacterium M10-2	1	1.3034	-0.9206	-0.4344	-0.3999
Unknown decoy protein for peptide #1069796		1	No data	No data	No data	No data
Carbamoyl-phphate synthase (glutamine-hydrolyzing)	Clostridium sp. BNL1100	1	-0.5064	-0.5915	-0.1851	0.436
Unknown protein for peptide #345371		1	No data	No data	No data	No data
Unknown protein for peptide #202433		1	No data	No data	No data	No data
Type I restriction endonuclease subunit M	Hymenobacter sp. PAMC 26628	1	No data	No data	No data	No data
Peptidylprolyl isomerase	Spirosoma radiotolerans	1	No data	No data	No data	No data
Unknown decoy protein for peptide #965312		1	No data	No data	No data	No data
Unknown protein for peptide #287816		1	No data	No data	No data	No data
Putative dGTPase	Prevotella bergensis DSM 17361	1	No data	No data	No data	No data
Unknown decoy protein for peptide #1060228		1	No data	No data	No data	No data
Unknown decoy protein for peptide #924719		1	No data	No data	No data	No data
Unknown protein for peptide #411254		1	No data	No data	No data	No data
Polyamine aminopropyltransferase	Syntrophothermus lipocalidus (strain DSM 12680 / TGB-C1)	1	-0.2205	-0.0635	-0.0406	0.7187
Uncharacterized protein	Rufibacter sp. DG31D	1	No data	No data	No data	No data
TonB-dependent receptor	Sphingobacterium sp. (strain 21)	1	No data	No data	No data	No data
Unknown decoy protein for peptide #1001309		1	No data	No data	No data	No data
Unknown decoy protein for peptide #1023449		1	No data	No data	No data	No data
Unknown decoy protein for peptide #1109218		1	No data	No data	No data	No data
Unknown protein for peptide #199197		1	No data	No data	No data	No data
Unknown protein for peptide #267714		1	No data	No data	No data	No data
Unknown protein for peptide #289829		1	No data	No data	No data	No data
Unknown protein for peptide #378356		1	No data	No data	No data	No data
Unknown protein for peptide #433949		1	No data	No data	No data	No data
Unknown decoy protein for peptide #788593		1	No data	No data	No data	No data
Unknown decoy protein for peptide #858663		1	No data	No data	No data	No data
Unknown decoy protein for peptide #895413		1	No data	No data	No data	No data
Unknown decoy protein for peptide #924175		1	No data	No data	No data	No data
Unknown decoy protein for peptide #925924		1	No data	No data	No data	No data
Unknown decoy protein for peptide #944872		1	No data	No data	No data	No data
Unknown decoy protein for peptide #953019		1	No data	No data	No data	No data
Unknown decoy protein for peptide #983346		1	No data	No data	No data	No data
Acyl-CoA dehydrogenase	Planococcus sp. L10.15	1	-0.1744	-0.2407	-0.3147	0.2
Uncharacterized protein	Clostridium sp. CAG:715	1	-1.1099	-0.5572	-0.5956	0.1203
Unknown decoy protein for peptide #1007273		1	-0.0658	-0.1555	-0.0528	0.0853
Unknown decoy protein for peptide #1008152		1	0.1056	-0.5569	-0.3026	-0.268
Unknown decoy protein for peptide #1046441		1	-1.19	-0.0602	0.0957	0.312
Unknown decoy protein for peptide #1150551		1	-0.3287	-0.1647	-0.1673	-0.0159
Unknown decoy protein for peptide #1171475		1	-0.2216	-0.2819	-0.2654	0.7931
Unknown decoy protein for peptide #1172540		1	-0.8906	-0.0368	-0.0415	0.7904
Unknown decoy protein for peptide #1205749		1	-0.1606	0.0037	-0.2609	-0.0236
Unknown decoy protein for peptide #1239781		1	-0.915	0.6486	0.2169	0.8059
Unknown decoy protein for peptide #1284692		1	-0.3907	-0.4726	-0.3782	0.0319
Unknown decoy protein for peptide #1435373		1	-1.1948	0.2512	-0.0824	0.5606
Unknown protein for peptide #303009		1	-0.3894	-0.4095	-0.1269	Value missing
Unknown protein for peptide #381768		1	-2.9253	0.3452	-0.1596	1.0999
Unknown protein for peptide #425113		1	0.3099	-0.1078	0.2373	0.2309
Unknown protein for peptide #459986		1	-0.045	-0.2592	-0.2593	0.7496
Unknown protein for peptide #550898		1	-1.2643	-0.3712	-0.2792	0.556
Unknown decoy protein for peptide #976583		1	0.1773	-0.1951	-0.1206	-0.2271
Unknown decoy protein for peptide #797360		1	No data	No data	No data	No data
Unknown decoy protein for peptide #843148		1	No data	No data	No data	No data
Unknown protein for peptide #292011		1	No data	No data	No data	No data
Unknown decoy protein for peptide #955537		1	No data	No data	No data	No data
Unknown decoy protein for peptide #796370		1	No data	No data	No data	No data
Unknown decoy protein for peptide #891304		1	No data	No data	No data	No data
Unknown protein for peptide #312572		1	No data	No data	No data	No data
Unknown protein for peptide #280081		1	No data	No data	No data	No data
Unknown protein for peptide #169467		1	No data	No data	No data	No data
Unknown decoy protein for peptide #947422		1	No data	No data	No data	No data
Unknown decoy protein for peptide #965195		1	No data	No data	No data	No data
Unknown decoy protein for peptide #872753		1	No data	No data	No data	No data
Unknown decoy protein for peptide #893623		1	No data	No data	No data	No data
Unknown protein for peptide #243407		1	No data	No data	No data	No data
Unknown decoy protein for peptide #743802		1	No data	No data	No data	No data
Unknown decoy protein for peptide #1056927		1	No data	No data	No data	No data
Unknown protein for peptide #369863		1	No data	No data	No data	No data
Unknown protein for peptide #104555		1	No data	No data	No data	No data
Unknown protein for peptide #251475		1	No data	No data	No data	No data
Unknown protein for peptide #296479		1	No data	No data	No data	No data
Unknown decoy protein for peptide #832127		1	No data	No data	No data	No data
Unknown decoy protein for peptide #862531		1	No data	No data	No data	No data
Unknown decoy protein for peptide #880465		1	No data	No data	No data	No data
Unknown decoy protein for peptide #920037		1	No data	No data	No data	No data
Unknown decoy protein for peptide #1050230		1	0.1246	-0.2991	-0.4317	0.2119
Unknown decoy protein for peptide #1121351		1	-0.7836	0.1339	0.1386	0.1532
Unknown protein for peptide #149222		1	-0.1151	-0.3946	-0.5221	0.3571
Unknown protein for peptide #302107		1	-0.316	-0.2548	-0.3022	0.5272
Unknown decoy protein for peptide #918985		1	-0.4956	-0.1634	-0.0199	0.6431
UDP-glucuronate 4-epimerase	Muricauda ruestringensis (strain DSM 13258 / LMG 19739 / B1)	1	No data	No data	No data	No data
Unknown decoy protein for peptide #1037313		1	No data	No data	No data	No data
Unknown decoy protein for peptide #802418		1	No data	No data	No data	No data
Unknown decoy protein for peptide #877523		1	No data	No data	No data	No data
Unknown protein for peptide #276448		1	No data	No data	No data	No data
Unknown decoy protein for peptide #891857		1	No data	No data	No data	No data
Unknown decoy protein for peptide #1035636		1	No data	No data	No data	No data
Unknown decoy protein for peptide #1215998		1	No data	No data	No data	No data
Unknown protein for peptide #323207		1	No data	No data	No data	No data
Unknown decoy protein for peptide #930130		1	No data	No data	No data	No data
Unknown decoy protein for peptide #964978		1	No data	No data	No data	No data
Unknown decoy protein for peptide #998324		1	No data	No data	No data	No data
Unknown decoy protein for peptide #873640		1	No data	No data	No data	No data
Unknown decoy protein for peptide #846251		1	No data	No data	No data	No data
DNA helicase	Flavobacterium sp. Root901	1	No data	No data	No data	No data
Unknown protein for peptide #281783		1	No data	No data	No data	No data
Unknown protein for peptide #351842		1	No data	No data	No data	No data
Unknown protein for peptide #389076		1	No data	No data	No data	No data
Unknown decoy protein for peptide #961302		1	No data	No data	No data	No data
Unknown protein for peptide #370392		1	No data	No data	No data	No data
Unknown protein for peptide #436754		1	0.2006	-0.2716	-0.3954	0.3864
Unknown protein for peptide #323361		1	No data	No data	No data	No data
Unknown protein for peptide #537475		1	No data	No data	No data	No data
Unknown decoy protein for peptide #983736		1	No data	No data	No data	No data
Unknown decoy protein for peptide #945836		1	No data	No data	No data	No data
dTDP-gluce 4-6-dehydratase	Prevotella bryantii B14	1	No data	No data	No data	No data
Uncharacterized protein	Aquimarina sp. RZW4-3-2	1	No data	No data	No data	No data
Unknown decoy protein for peptide #1090875		1	No data	No data	No data	No data
Unknown decoy protein for peptide #928195		1	No data	No data	No data	No data
Unknown decoy protein for peptide #1041011		1	No data	No data	No data	No data
Unknown protein for peptide #382495		1	No data	No data	No data	No data
Unknown protein for peptide #257776		1	No data	No data	No data	No data
Unknown decoy protein for peptide #955829		1	No data	No data	No data	No data
Unknown protein for peptide #365251		1	No data	No data	No data	No data
Unknown decoy protein for peptide #861897		1	No data	No data	No data	No data
Unknown protein for peptide #447595		1	No data	No data	No data	No data
Unknown decoy protein for peptide #916025		1	No data	No data	No data	No data
Unknown protein for peptide #551388		1	No data	No data	No data	No data
Uncharacterized protein	Aquimarina atlantica	1	No data	No data	No data	No data
Unknown decoy protein for peptide #967065		1	No data	No data	No data	No data
Putative pyridoxal phphate-dependent aminotransferase EpsN	Mucilaginibacter gotjawali	1	No data	No data	No data	No data
Acetyl-CoA acetyltransferase	Gemella morbillorum M424	1	-0.6184	-0.7769	-0.3483	-0.0844
Unknown decoy protein for peptide #835312		1	No data	No data	No data	No data
Unknown decoy protein for peptide #1158442		1	No data	No data	No data	No data
Unknown protein for peptide #192544		1	No data	No data	No data	No data
Unknown protein for peptide #303454		1	No data	No data	No data	No data
UDP-N-acetylmuramate--L-alanine ligase	Odoribacter laneus YIT 12061	1	No data	No data	No data	No data
Unknown protein for peptide #262793		1	No data	No data	No data	No data
Unknown protein for peptide #272985		1	No data	No data	No data	No data
Unknown decoy protein for peptide #842488		1	No data	No data	No data	No data
Unknown protein for peptide #366855		1	No data	No data	No data	No data
Unknown decoy protein for peptide #1164786		1	No data	No data	No data	No data
Type IV secretory system Conjugative DNA transfer family protein	Bacteroides fragilis str. J-143-4	1	No data	No data	No data	No data
Unknown decoy protein for peptide #870426		1	No data	No data	No data	No data
Unknown protein for peptide #390113		1	No data	No data	No data	No data
Dihydropteroate synthase	Flavobacterium sp. VMW	1	No data	No data	No data	No data
Unknown decoy protein for peptide #913130		1	No data	No data	No data	No data
Unknown decoy protein for peptide #1009220		1	No data	No data	No data	No data
Unknown decoy protein for peptide #829220		1	No data	No data	No data	No data
Unknown protein for peptide #277955		1	No data	No data	No data	No data
Unknown decoy protein for peptide #1061591		1	No data	No data	No data	No data
Unknown decoy protein for peptide #905117		1	No data	No data	No data	No data
Unknown decoy protein for peptide #821942		1	No data	No data	No data	No data
Unknown decoy protein for peptide #898042		1	No data	No data	No data	No data
Unknown decoy protein for peptide #833989		1	No data	No data	No data	No data
Unknown decoy protein for peptide #941627		1	No data	No data	No data	No data
Uncharacterized protein	Tannerella sp. CAG:118	1	No data	No data	No data	No data
Unknown protein for peptide #248756		1	No data	No data	No data	No data
Unknown protein for peptide #227825		1	No data	No data	No data	No data
Glutamate synthase (NADH) small subunit	Chlorobium chlorochromatii (strain CaD3)	1	No data	No data	No data	No data
Uncharacterized protein	Pedobacter sp. Leaf216	1	No data	No data	No data	No data
Unknown protein for peptide #328734		1	No data	No data	No data	No data
Unknown protein for peptide #305183		1	No data	No data	No data	No data
Unknown decoy protein for peptide #1050070		1	No data	No data	No data	No data
Unknown decoy protein for peptide #952733		1	No data	No data	No data	No data
Unknown decoy protein for peptide #1041075		1	No data	No data	No data	No data
Unknown protein for peptide #157390		1	No data	No data	No data	No data
Unknown decoy protein for peptide #964350		1	No data	No data	No data	No data
Unknown decoy protein for peptide #955802		1	No data	No data	No data	No data
Unknown decoy protein for peptide #898127		1	No data	No data	No data	No data
Unknown decoy protein for peptide #1044613		1	No data	No data	No data	No data
Unknown protein for peptide #291899		1	No data	No data	No data	No data
Unknown decoy protein for peptide #920017		1	No data	No data	No data	No data
Unknown decoy protein for peptide #991785		1	No data	No data	No data	No data
Unknown decoy protein for peptide #1046449		1	No data	No data	No data	No data
Unknown protein for peptide #333501		1	No data	No data	No data	No data
Unknown protein for peptide #440135		1	No data	No data	No data	No data
Unknown protein for peptide #334922		1	No data	No data	No data	No data
Unknown protein for peptide #300366		1	No data	No data	No data	No data
Unknown decoy protein for peptide #1050010		1	No data	No data	No data	No data
Unknown decoy protein for peptide #909485		1	No data	No data	No data	No data
Unknown decoy protein for peptide #814300		1	No data	No data	No data	No data
Uncharacterized protein	Pedobacter antarcticus 4BY	1	No data	No data	No data	No data
Unknown protein for peptide #365862		1	No data	No data	No data	No data
Unknown decoy protein for peptide #1170255		1	0.0821	0.0813	0.0322	0.9804
Unknown decoy protein for peptide #940264		1	No data	No data	No data	No data
Unknown decoy protein for peptide #1033514		1	No data	No data	No data	No data
Unknown decoy protein for peptide #910386		1	No data	No data	No data	No data
Unknown decoy protein for peptide #867006		1	No data	No data	No data	No data
Unknown decoy protein for peptide #935691		1	No data	No data	No data	No data
Unknown protein for peptide #340925		1	No data	No data	No data	No data
Unknown decoy protein for peptide #1027609		1	No data	No data	No data	No data
Unknown decoy protein for peptide #1039923		1	No data	No data	No data	No data
Unknown protein for peptide #400494		1	No data	No data	No data	No data
Unknown protein for peptide #272590		1	No data	No data	No data	No data
Unknown decoy protein for peptide #867791		1	No data	No data	No data	No data
Unknown decoy protein for peptide #903178		1	No data	No data	No data	No data
Unknown decoy protein for peptide #938771		1	No data	No data	No data	No data
Unknown protein for peptide #236063		1	No data	No data	No data	No data
Unknown decoy protein for peptide #888839		1	No data	No data	No data	No data
Unknown decoy protein for peptide #943782		1	No data	No data	No data	No data
Probable aspartate--tRNA ligase, cytoplasmic	Cardinium endosymbiont cEper1 of Encarsia pergandiella	1	No data	No data	No data	No data
Unknown decoy protein for peptide #892220		1	No data	No data	No data	No data
Unknown decoy protein for peptide #1146511		1	-0.6569	-0.0043	-0.1618	0.8024
Unknown protein for peptide #362805		1	No data	No data	No data	No data
Unknown protein for peptide #292483		1	No data	No data	No data	No data
Unknown protein for peptide #349656		1	No data	No data	No data	No data
Unknown decoy protein for peptide #757197		1	No data	No data	No data	No data
Unknown protein for peptide #175305		1	No data	No data	No data	No data
Unknown protein for peptide #354900		1	No data	No data	No data	No data
Unknown decoy protein for peptide #1015087		1	No data	No data	No data	No data
Unknown protein for peptide #299286		1	No data	No data	No data	No data
Unknown decoy protein for peptide #875214		1	No data	No data	No data	No data
Unknown protein for peptide #227775		1	No data	No data	No data	No data
Unknown decoy protein for peptide #771897		1	No data	No data	No data	No data
Unknown decoy protein for peptide #968106		1	No data	No data	No data	No data
Unknown decoy protein for peptide #988099		1	No data	No data	No data	No data
Unknown decoy protein for peptide #798426		1	No data	No data	No data	No data
Unknown decoy protein for peptide #799759		1	No data	No data	No data	No data
Unknown protein for peptide #259483		1	No data	No data	No data	No data
Unknown decoy protein for peptide #1010765		1	No data	No data	No data	No data
Unknown protein for peptide #202899		1	No data	No data	No data	No data
Unknown decoy protein for peptide #742535		1	No data	No data	No data	No data
Unknown decoy protein for peptide #803925		1	No data	No data	No data	No data
Unknown decoy protein for peptide #790627		1	No data	No data	No data	No data
Unknown protein for peptide #181553		1	No data	No data	No data	No data
Unknown decoy protein for peptide #969526		1	No data	No data	No data	No data
Unknown protein for peptide #221054		1	No data	No data	No data	No data
Unknown decoy protein for peptide #751340		1	No data	No data	No data	No data
Unknown protein for peptide #125453		1	No data	No data	No data	No data
Unknown protein for peptide #315879		1	No data	No data	No data	No data
Unknown decoy protein for peptide #992087		1	No data	No data	No data	No data
Unknown protein for peptide #350985		1	No data	No data	No data	No data
Unknown decoy protein for peptide #1095094		1	-0.3472	-0.3091	-0.3283	0.4255
Unknown protein for peptide #525862		1	-1.039	-0.1757	-0.4203	0.4567
Unknown decoy protein for peptide #840426		1	No data	No data	No data	No data
Unknown decoy protein for peptide #786394		1	No data	No data	No data	No data
Unknown decoy protein for peptide #1001621		1	No data	No data	No data	No data
Unknown protein for peptide #312842		1	No data	No data	No data	No data
Unknown decoy protein for peptide #1156964		1	-0.1902	-0.1537	-0.268	0.6968
Outer membrane protein	Cytophaga hutchinsonii (strain ATCC 33406 / NCIMB 9469)	1	No data	No data	No data	No data
Unknown decoy protein for peptide #1006728		1	No data	No data	No data	No data
Unknown decoy protein for peptide #872703		1	No data	No data	No data	No data
Unknown decoy protein for peptide #938271		1	No data	No data	No data	No data
Unknown decoy protein for peptide #1000390		1	No data	No data	No data	No data
Putative phage infection protein	Clostridium botulinum (strain Loch Maree / Type A3)	1	-0.4417	-0.4805	-0.3798	0.6371
Unknown protein for peptide #199247		1	No data	No data	No data	No data

## Sheet: Table S2
Table S3. All bacterial submucosal proteins identified by 1 or more peptides
			fold change from 'total protein'
Protein Name	Species	P value	Low fat	Milk fat	Olive oil	Corn oil
Uncharacterized protein	Paenibacillus sp. IHB B 3415	0.007	0.3271	-0.1235	-0.866	0.8571
Molecular chaperone DnaK	Paenibacillus sp. IHB B 3415	0.012	-0.0473	-0.2307	0.2265	-0.1358
Uncharacterized protein (Fragment)	Paenibacillus sp. IHB B 3415	0.017	0.2584	-0.05	0.0717	-0.0112
Cluster of ATP synthase subunit beta	Pedobacter antarcticus 4BY	0.98	0.0782	-0.1118	0.4683	0.038
Uncharacterized protein	Paenibacillus sp. IHB B 3415	1	1.1209	0.8222	0.6805	1.4267
Glutamine--fructe-6-phphate aminotransferase [isomerizing]	Clostridiales bacterium CHKCI006	1	-0.736	-1.1616	-0.3945	0.8046
Methyltransferase	Firmicutes bacterium CAG:238	1	0.5276	0.7644	0.6763	0.6067
ATP-dependent zinc metalloprotease FtsH	Thermovenabulum gondwanense	1	0.547	0.2523	0.2949	0.4877
Unknown decoy protein for peptide #1057601		1	0.2079	0.0923	0.4213	0.4606
Unknown decoy protein for peptide #1109614		1	0.2389	-0.0404	-0.1093	0.4028
Unknown protein for peptide #105982		1	0.5011	0.0829	0.3605	0.3548
Unknown decoy protein for peptide #1036167		1	0.2275	0.0831	-0.182	0.3474
Unknown decoy protein for peptide #1023556		1	0.2342	0.3079	0.5893	0.3447
Uncharacterized protein	Anoxybacillus sp. KU2-6(11)	1	0.3099	0.4837	0.2585	0.3215
Elongation factor Tu	Oscillibacter valericigenes (strain DSM 18026 / NBRC 101213 / Sjm18-20)	1	0.382	0.2225	0.3915	0.2765
Probable cytol aminopeptidase	Paenibacillus beijingensis	1	0.3938	0.1523	0.616	0.2613
Unknown decoy protein for peptide #1389510		1	-0.1715	-0.0138	-0.1793	0.2364
Unknown protein for peptide #198948		1	0.1353	-0.2892	-0.1449	0.2302
ATP synthase subunit B	Bacillus sp. NRRL B-14911	1	-0.1122	-0.1253	0.1496	0.2046
Unknown protein for peptide #482433		1	-0.0679	-0.2519	0.2793	0.1959
NADP-dependent glyceraldehyde-3-phphate dehydrogenase	Streptococcus pneumoniae	1	-0.1239	-0.3522	0.4731	0.1923
Unknown decoy protein for peptide #845072		1	0.196	0.0005	-0.0623	0.179
Adenylate kinase	Eubacterium sp. CAG:180	1	0.1396	-0.0361	0.2979	0.1779
ABC transporter-like protein	Paenibacillus dendritiformis C454	1	0.1564	0.2961	0.0679	0.1434
Unknown decoy protein for peptide #1184658		1	-0.0038	0.0323	0.2862	0.1252
Unknown protein for peptide #117837		1	-0.165	-0.1617	0.2246	0.1009
Unknown decoy protein for peptide #1050843		1	-0.1705	0.2456	0.319	0.088
Elongation factor Tu	Desulfotomaculum kuznetsovii (strain DSM 6115 / VKM B-1805 / 17)	1	0.107	-0.1065	0.2764	0.0879
Uncharacterized protein	Brochothrix thermosphacta DSM 20171	1	-0.1846	-0.3139	0.2317	0.0694
2,3-bisphphoglycerate-dependent phphoglycerate mutase	Sporolactobacillus inulinus CASD	1	-0.0384	0.0722	0.5321	0.0637
Unknown decoy protein for peptide #1045109		1	0.1522	-0.0531	-0.0465	0.0555
Unknown decoy protein for peptide #837337		1	0.091	-0.0966	0.3009	0.0482
Uncharacterized protein	Paenibacillus sp. FSL R5-0345	1	0.0925	-0.0268	0.0011	0.0428
Unknown protein for peptide #212970		1	0.0703	-0.1443	0.16	0.0353
Uncharacterized protein	Bacillus sp. FJAT-18019	1	0.1585	0.0065	-0.0777	0.0238
Unknown protein for peptide #236576		1	-0.1936	-0.2953	0.0626	0.019
Rgg protein	Streptococcus equi subsp. zooepidemicus Sz16	1	0.0556	-0.0642	0.0236	0.0138
Cbxx/cfqx	Trichococcus palustris	1	-0.0949	0.0464	0.1553	0.0095
Unknown protein for peptide #458284		1	0.077	-0.0987	0.2615	0.0073
Heptaprenyl diphphate synthase (HEPPP synthase) subunit 1	Paenibacillus sp. oral taxon 786 str. D14	1	0.1562	0.0274	0.0332	0.0038
Unknown decoy protein for peptide #1021237		1	-0.079	1.9045	0.0124	Value missing
Uncharacterized protein	Bacteroides sp. SM23_62_1	1	No data	No data	No data	No data
Adenylhomocysteinase	Roseivirga sp. D-25	1	No data	No data	No data	No data
Contig40, whole genome shotgun sequence	Pedobacter sp. NL19	1	No data	No data	No data	No data
Uncharacterized protein	Pedobacter sp. PACM 27299	1	No data	No data	No data	No data
Phphoglycerate kinase	Sphingobacterium sp. ML3W	1	No data	No data	No data	No data
Putative type I restriction enzymeP M protein	Cecembia lonarensis LW9	1	No data	No data	No data	No data
Uncharacterized protein	Prevotella maculosa OT 289	1	No data	No data	No data	No data
Transaldolase	Lentimicrobium saccharophilum	1	No data	No data	No data	No data
Heavy metal efflux pump, CzcA family protein	Parabacteroides distasonis str. 3776 Po2 i	1	No data	No data	No data	No data
Type I citrate synthase	Flavihumibacter sp. ZG627	1	No data	No data	No data	No data
Aconitase (Fragment)	Chlorobi bacterium OLB5	1	No data	No data	No data	No data
Uncharacterized protein	Saprospira grandis DSM 2844	1	No data	No data	No data	No data
Subtilisin-like serine protease	Chlorobi bacterium OLB7	1	No data	No data	No data	No data
ATP-dependent zinc metalloprotease FtsH	[Clostridium] litorale DSM 5388	1	No data	No data	No data	No data
DNA mismatch repair protein MutS	Bacteroides sp. HPS0048	1	No data	No data	No data	No data
RND transporter, HAE1 family	Alistipes sp. HGB5	1	No data	No data	No data	No data
Ubiquinone/menaquinone biynthesis C-methyltransferase UbiE	Pedobacter glucosidilyticus	1	No data	No data	No data	No data
NADH dehydrogenase	Chryseobacterium solincola	1	No data	No data	No data	No data
Uncharacterized protein	Bacteroides pectinophilus CAG:437	1	No data	No data	No data	No data
Unknown decoy protein for peptide #704992		1	No data	No data	No data	No data
Uncharacterized protein	Chlorobium sp. GBChlB	1	No data	No data	No data	No data
Uncharacterized protein	Tannerella forsythia KS16	1	No data	No data	No data	No data
Uncharacterized protein	Bacteroides sp. 3_1_13	1	No data	No data	No data	No data
L-lactate permease	Lunatimonas lonarensis	1	No data	No data	No data	No data
3-oxoacyl-[acyl-carrier protein] reductase	Algibacter lectus	1	No data	No data	No data	No data
NAD(P)H-dependent oxidoreductase	Chryseobacterium sp. JAH	1	No data	No data	No data	No data
Unknown decoy protein for peptide #644658		1	No data	No data	No data	No data
Unknown decoy protein for peptide #1240632		1	No data	No data	No data	No data
Acetyl-CoA carboxylase, carboxyltransferase component	Lentimicrobium saccharophilum	1	No data	No data	No data	No data
Iron-sulfur cluster assembly scaffold protein IscU	Bacteroidetes bacterium OLB11	1	No data	No data	No data	No data
Unknown decoy protein for peptide #697254		1	No data	No data	No data	No data
Unknown decoy protein for peptide #841407		1	No data	No data	No data	No data
Unknown decoy protein for peptide #844976		1	No data	No data	No data	No data
Unknown decoy protein for peptide #846937		1	No data	No data	No data	No data
Unknown decoy protein for peptide #847056		1	No data	No data	No data	No data
Unknown decoy protein for peptide #895537		1	No data	No data	No data	No data
Unknown decoy protein for peptide #914548		1	No data	No data	No data	No data
Unknown decoy protein for peptide #915679		1	No data	No data	No data	No data
Unknown decoy protein for peptide #956941		1	No data	No data	No data	No data
Uncharacterized protein	Leadbetterella sp. JN14-9	1	No data	No data	No data	No data
Divergent AAA domain protein	Sphingobacterium spiritivorum ATCC 33861	1	No data	No data	No data	No data
Unknown protein for peptide #197536		1	No data	No data	No data	No data
Unknown decoy protein for peptide #676226		1	No data	No data	No data	No data
Unknown decoy protein for peptide #1033773		1	No data	No data	No data	No data
Acetyl-CoA acyltransferase	Halobacillus halophilus (strain ATCC 35676 / DSM 2266 / JCM 20832 / NBRC 102448/ NCIMB 2269)	1	0.2994	0.0896	0.1446	-0.0021
Malate dehydrogenase	Streptococcus pneumoniae	1	0.0684	-0.0946	0.4248	-0.0196
3-ketoacyl-ACP reductase	Streptococcus pneumoniae	1	0.2762	-0.2436	0.0364	-0.0443
Unknown protein for peptide #518446		1	0.3685	-0.469	-0.6733	-0.0486
Acetyl-CoA acetyltransferase	Syntrophothermus lipocalidus (strain DSM 12680 / TGB-C1)	1	0.1362	0.0375	0.1029	-0.0498
Unknown decoy protein for peptide #1057710		1	0.466	0.0899	0.3938	-0.0512
Unknown decoy protein for peptide #1000965		1	-0.0871	-0.1068	-0.0857	-0.0578
Unknown protein for peptide #586891		1	0.082	-0.2051	-0.1861	-0.0635
Lon protease	Clostridium sp. L2-50	1	-0.0503	0.0218	-0.2275	-0.0666
Unknown decoy protein for peptide #1064456		1	0.0713	-0.1675	-0.2101	-0.0762
Cluster of ATP synthase subunit alpha	Lactobacillus alimentarius DSM 20249	1	-0.055	-0.1138	0.2383	-0.0802
Chaperone protein DnaK	Dialister invisus DSM 15470	1	0.0034	-0.2062	0.021	-0.1036
Unknown decoy protein for peptide #1021225		1	0.2568	0.6712	0.3652	-0.1065
IstB-like ATP-binding protein	Clostridium sp. CAG:1013	1	-0.0393	0.0045	0.2021	-0.1179
Uncharacterized protein	Anaerovibrio lipolyticus	1	0.3126	-0.2772	-0.5316	-0.1237
Acetyl-CoA acetyltransferase	Brevibacillus reuszeri	1	0.1913	0.0222	-0.0551	-0.1293
Unknown decoy protein for peptide #1176472		1	0.0483	-0.5402	-0.4382	-0.1392
Unknown decoy protein for peptide #871306		1	0.0431	-0.1977	-0.1318	-0.1593
N-succinyldiaminopimelate aminotransferase	Staphylococcus pasteuri	1	0.2594	-0.0394	-0.2166	-0.161
Unknown decoy protein for peptide #1219378		1	0.2324	-0.3126	0.0859	-0.1745
Unknown decoy protein for peptide #807928		1	0.0723	-0.277	-0.3473	-0.1747
2,3-bisphphoglycerate-dependent phphoglycerate mutase	Halanaerobium praevalens (strain ATCC 33744 / DSM 2228 / GSL)	1	-0.4704	-0.3325	0.1257	-0.1875
Unknown decoy protein for peptide #899778		1	-0.0973	-0.125	-0.1695	-0.219
Beta-glucidase/6-phpho-beta-glucidase/beta-galactidase	Lactococcus lactis subsp. cremoris GE214	1	-0.1133	-0.3513	0.0406	-0.2388
Unknown decoy protein for peptide #1059657		1	-0.0822	-0.062	-0.0683	-0.2691
Spore coat protein CotF	Paenibacillus sabinae T27	1	-0.0114	-0.448	-0.2387	-0.3318
Endonuclease MutS2	Paenibacillus sp. FSL H7-0357	1	2.2313	-1.9927	-1.1297	-2.2757

## Sheet: Table S3
Table S4. All host submucosal proteins identified by 4 or more peptides
		fold change from 'total protein'					Benjamini-Hochberg corrected P values
Protein Name	P value	Low fat	Milk fat	Olive oil	Corn oil		Lowfat~Milk	Lowfat~Olive	Lowfat~Corn	Milk ~ Olive	Milk~Corn	Olive~Corn
116 kDa U5 small nuclear ribonucleoprotein component	0.0001	0	0	-0.1	0.2		0.86	0.018	0.12	0.031	0.0011	0.00065
14-3-3 protein theta	0.0018	0	-0.1	-0.1	0.1		0.078	0.078	< 0.0001	0.26	0.0039	0.037
14-3-3 protein zeta/delta	0.0035	0.1	-0.1	-0.1	0.1		0.025	0.0039	0.0017	0.037	0.11	0.016
1-phosphatidylinositol 4,5-bisphosphate phosphodiesterase beta-1	0.0009	-0.1	-0.1	-0.5	-0.2		0.19	0.05	0.13	0.05	0.05	0.05
2,4-dienoyl-CoA reductase, mitochondrial	0.002	0	0.1	0.1	0.3		0.028	0.12	1	0.46	0.009	0.009
26S protease regulatory subunit 10B	0.003	0.1	0.1	0.2	0		0.29	0.016	0.05	0.018	1	0.0016
26S proteasome non-ATPase regulatory subunit 11	0.0001	0	0.2	0	0		0.00078	0.074	1	0.0063	0.00078	0.23
26S proteasome non-ATPase regulatory subunit 5	0.0001	-0.1	-0.2	0.1	0		0.34	0.00016	1	0.00016	0.00021	0.00088
2-amino-3-ketobutyrate coenzyme A ligase, mitochondrial	0.003	-0.3	-0.5	1.1	-0.5		0.05	0.05	0.69	0.05	0.38	0.05
2-oxoglutarate dehydrogenase, mitochondrial	0.0001	0.1	0.3	-0.2	0.2		< 0.0001	0.00039	0.05	< 0.0001	0.00022	< 0.0001
3'(2'),5'-bisphosphate nucleotidase 1	0.00044	0	0.2	0.2	0		0.0016	0.0087	0.035	0.6	0.00078	0.01
39S ribosomal protein L12, mitochondrial	0.002	-0.2	0	0	0.1		0.021	0.021	0.061	0.56	0.67	0.39
3-hydroxyisobutyryl-CoA hydrolase, mitochondrial	0.00026	-0.1	0.1	0.3	0.2		0.0082	0.0039	0.083	0.078	0.11	0.17
3-ketoacyl-CoA thiolase A, peroxisomal	0.005	0.2	-0.1	0.1	0		0.0027	0.18	1	0.055	0.18	0.11
3-mercaptopyruvate sulfurtransferase	0.0001	-0.3	0.3	0.3	0.1		0.009	0.009	1	0.53	0.076	0.009
40S ribosomal protein S11	0.001	0.1	-0.1	-0.2	0.5		0.05	0.05	1	0.13	0.05	0.05
40S ribosomal protein S12	0.0016	0	0	0.2	0		0.77	0.021	0.12	0.021	0.77	0.021
40S ribosomal protein S14	0.0003	0.1	0	-0.2	0.2		0.25	0.043	0.51	0.083	0.021	0.021
40S ribosomal protein S15a	0.0016	0.1	-0.1	-0.3	0.2		0.043	0.25	0.83	0.25	0.021	0.15
40S ribosomal protein S16	0.0001	0.2	-0.2	0	0.4		0.021	0.021	0.05	0.021	0.021	0.021
40S ribosomal protein S17	0.004	0.1	0.1	-0.3	0.3		0.83	0.05	0.51	0.05	0.28	0.05
40S ribosomal protein S19	0.0001	0.2	-0.1	-0.1	0.3		0.021	0.021	0.12	0.25	0.021	0.021
40S ribosomal protein S2	0.0001	0.3	0	0	0.4		0.0039	0.016	0.51	0.11	0.0039	0.025
40S ribosomal protein S25	0.0001	0.2	0.1	-0.4	0.4		0.13	0.05	0.081	0.05	0.05	0.05
40S ribosomal protein S3	0.002	0	0.1	0.1	0.1		0.0039	0.037	0.12	0.26	0.34	0.34
40S ribosomal protein S4, X isoform	0.00016	0.2	-0.1	-0.1	0.4		0.028	0.028	0.12	0.46	0.009	0.009
40S ribosomal protein S6	0.001	-0.1	-0.3	-0.2	0.2		0.05	0.51	0.12	0.13	0.05	0.05
40S ribosomal protein S7	0.00031	0.4	0.5	0.1	0.6		0.021	0.021	0.12	0.021	0.19	0.021
40S ribosomal protein S8	0.0001	0.1	-0.2	-0.3	0.4		0.009	0.009	0.12	0.17	0.009	0.009
40S ribosomal protein SA	0.0001	-0.1	0.1	0.3	-0.1		0.0017	0.0017	0.12	0.0017	0.004	0.0017
4-trimethylaminobutyraldehyde dehydrogenase	0.0043	0	-0.2	0	-0.1		0.009	0.46	0.039	0.037	0.14	0.25
60 kDa heat shock protein, mitochondrial	0.0001	0	0.2	0.1	0.2		< 0.0001	0.00097	0.77	< 0.0001	0.00032	0.041
60S acidic ribosomal protein P0	0.004	0.2	0.2	0.3	0.1		0.29	0.036	0.15	0.059	0.074	0.021
60S acidic ribosomal protein P2	0.001	-0.1	-0.1	0.2	-0.1		0.39	0.021	0.081	0.021	0.15	0.021
60S ribosomal protein L13	0.0001	0	-0.2	-0.1	0.4		0.009	0.12	0.83	0.009	0.009	0.009
60S ribosomal protein L14	0.006	0.2	0	0.6	0.3		0.05	0.05	0.31	0.05	0.05	0.13
60S ribosomal protein L18	0.00027	0	-0.2	0.2	0.3		0.083	0.021	1	0.021	0.021	0.39
60S ribosomal protein L23	0.0001	0.2	0.1	-0.4	0.4		0.13	0.05	0.28	0.05	0.05	0.05
60S ribosomal protein L4	0.0001	0.1	-0.2	-0.1	0.3		0.0039	0.055	0.56	0.037	0.0039	0.0039
60S ribosomal protein L5	0.001	0	-0.1	-0.4	0.2		0.25	0.083	0.13	0.19	0.043	0.043
60S ribosomal protein L6	0.0001	0	-0.2	0.2	0.3		0.021	0.021	0.081	0.021	0.021	0.043
60S ribosomal protein L7	0.0001	0.2	-0.2	0.2	0.4		0.05	0.51	0.15	0.05	0.05	0.05
60S ribosomal protein L8	0.001	0.1	-0.1	0	0.5		0.28	0.13	0.51	0.51	0.05	0.05
6-phosphofructokinase type C	0.0001	0.2	-0.1	-0.3	0.2		0.006	0.0088	0.34	0.064	0.0033	0.004
6-phosphofructokinase, liver type	0.003	0	0.1	0	0.2		0.025	0.57	0.15	0.085	0.013	0.048
6-phosphofructokinase, muscle type	0.001	0.1	-0.1	-0.5	0.1		0.05	0.05	0.037	0.05	0.05	0.05
6-phosphogluconate dehydrogenase, decarboxylating	0.0001	0.2	0.3	0	0.3		0.0039	0.01	0.15	0.0039	0.2	0.0065
6-phosphogluconolactonase	0.00013	-0.2	0.2	0.2	0.2		0.0039	0.0039	< 0.0001	0.47	0.34	0.69
78 kDa glucose-regulated protein	0.0001	0	0	0.4	0		0.79	< 0.0001	0.074	< 0.0001	0.65	< 0.0001
Acetyl-CoA acetyltransferase, cytosolic	0.002	0	0.1	0.3	0		0.083	0.021	1	0.043	0.56	0.021
Acid ceramidase	0.0001	0	-0.1	0.2	0.1		0.0087	0.0033	0.015	0.00094	0.027	0.016
Aconitate hydratase, mitochondrial	0.0001	0	0.1	-0.1	0.2		0.00041	0.039	0.098	< 0.0001	< 0.0001	< 0.0001
Actin-related protein 2/3 complex subunit 2	0.0001	0	0	-0.1	0.2		0.29	0.46	0.0044	0.12	0.00078	0.0087
Actin-related protein 3	0.0035	0	-0.1	0.1	0.1		0.034	0.038	0.039	0.016	0.00025	0.2
Activated RNA polymerase II transcriptional coactivator p15	0.0001	0	-0.1	0.2	0.3		0.05	0.05	0.44	0.05	0.05	0.51
Acyl-CoA synthetase family member 2, mitochondrial	0.0001	0	0.4	0.1	0.2		0.0039	0.031	0.15	0.0039	0.0039	1
Acyl-coenzyme A synthetase ACSM3, mitochondrial	0.00086	-0.1	0.2	0.4	0.2		0.021	0.021	0.46	0.021	0.77	0.043
Acyl-coenzyme A thioesterase 2, mitochondrial	0.0001	-0.1	0.1	-0.1	0.1		0.00016	0.082	0.00016	0.00016	0.033	0.0078
Adenosine kinase	0.0001	0	0.3	0.6	0.2		0.009	0.009	0.031	0.009	0.12	0.009
Adenosylhomocysteinase	0.0001	-0.1	0.1	0.4	0.1		0.00031	< 0.0001	0.12	< 0.0001	0.27	< 0.0001
Adenylate kinase 2, mitochondrial	0.0001	0	0.1	0.3	0.2		0.0027	0.0017	0.23	0.074	0.8	0.064
Adenylate kinase isoenzyme 1	0.0001	-0.2	0.2	-0.4	-0.1		0.021	0.021	0.56	0.021	0.021	0.021
Adenylyl cyclase-associated protein 2	0.0016	0.1	-0.1	-0.4	0		0.15	0.083	0.0013	0.021	0.043	0.021
Adipocyte plasma membrane-associated protein	0.005	0	-0.2	0	0.1		0.05	0.28	0.25	0.05	0.05	0.51
ADP-ribosylation factor-like protein 1	0.00075	0	0.2	0	0.1		0.021	0.083	0.0013	0.021	0.043	0.021
Adseverin	0.0001	0.1	0	0.4	0.2		0.13	0.0017	< 0.0001	0.0073	0.018	0.03
Alcohol dehydrogenase [NADP(+)]	0.0001	-0.1	0.2	0.3	0.1		0.00035	0.00035	< 0.0001	0.0092	0.0017	0.00035
Alcohol dehydrogenase 1	0.0001	0	0.1	0.4	0.3		0.0039	0.00078	0.054	0.00078	0.0039	0.046
Aldehyde dehydrogenase X, mitochondrial	0.001	0.1	0.1	0.3	0.3		0.38	0.018	< 0.0001	0.061	0.0005	0.77
Aldehyde dehydrogenase, mitochondrial	0.0001	0.1	-0.1	0.3	0.3		0.0013	< 0.0001	0.19	< 0.0001	< 0.0001	0.82
Aldose reductase	0.001	0	0.1	0.3	0.3		0.016	0.01	< 0.0001	0.02	0.0039	0.69
Alpha actinin 1a	0.0001	0.2	-0.2	-0.4	-0.1		< 0.0001	< 0.0001	0.12	< 0.0001	0.48	< 0.0001
Alpha globin 1	0.003	-0.2	-0.1	-0.4	0.1		0.35	0.009	1	0.095	0.009	0.009
Alpha/beta hydrolase domain-containing protein 14B	0.0001	-0.2	0.2	0.3	0.2		0.009	0.009	0.0015	0.12	0.46	0.12
Alpha-1-antitrypsin 1-5	0.0001	0.5	-0.5	-0.1	0.8		0.009	0.009	< 0.0001	0.009	0.009	0.009
Alpha-2-HS-glycoprotein	0.0001	0	0.4	-0.4	-0.1		0.009	0.009	0.00078	0.009	0.009	0.016
Alpha-2-macroglobulin	0.0001	0.1	0.1	-0.3	0.1		0.0019	< 0.0001	0.15	< 0.0001	0.04	< 0.0001
Alpha-enolase	0.0001	-0.2	0	-0.1	0.1		0.00016	0.023	0.0051	0.00016	0.053	0.0028
Alpha-internexin	0.0033	0	-0.2	-0.3	-0.2		0.12	0.009	0.38	0.25	1	0.076
Alpha-mannosidase 2	0.00027	0.2	0.3	-0.1	0.3		0.11	0.061	0.44	0.061	0.25	0.043
Alpha-N-acetylgalactosaminidase	0.00035	-0.2	0	0.3	0.2		0.043	0.021	0.17	0.021	0.021	0.043
Alpha-parvin	0.0001	0	-0.2	-0.3	-0.1		0.0065	0.0039	0.51	0.0065	0.0039	0.0039
Amine oxidase [flavin-containing] A	0.0001	-0.4	0.2	0.1	0.3		0.0017	0.0017	0.0012	0.14	0.0017	0.035
Amine oxidase [flavin-containing] B	0.001	0.4	-0.2	-0.3	-0.1		0.021	0.021	0.0011	0.11	0.11	0.11
Aminopeptidase B	0.00017	0.2	0.1	0.2	0.3		0.13	0.23	< 0.0001	0.0063	0.00078	0.16
Aminopeptidase N	0.0001	0.2	-0.3	0.2	0		0.00041	1	0.00016	0.00035	0.00079	0.0031
Annexin	0.0001	0.2	-0.1	-0.1	-0.1		< 0.0001	< 0.0001	0.12	0.41	0.2	0.69
Annexin A1	0.001	0.1	0.1	0	-0.1		0.00034	0.23	< 0.0001	0.00073	< 0.0001	0.38
Annexin A2	0.0001	0.1	-0.1	0.1	0		< 0.0001	0.8	< 0.0001	< 0.0001	0.033	0.003
Annexin A3	0.0001	-0.2	0.1	0.3	0.2		0.00044	0.00018	< 0.0001	0.028	0.023	0.054
Annexin A5	0.0001	0	-0.1	-0.1	0.1		0.0051	0.78	0.25	0.52	< 0.0001	0.0067
Anterior gradient protein 2 homolog	0.0001	-0.1	0.8	0.3	-0.1		0.021	0.021	< 0.0001	0.021	0.021	0.021
Antithrombin-III	0.0001	-0.1	0	0.4	0		0.0073	0.0027	< 0.0001	0.0049	0.14	0.0033
AP-2 complex subunit alpha-1	0.00015	0.2	0	-0.2	0.1		0.004	0.0017	0.00044	0.0088	0.14	0.0017
AP-2 complex subunit alpha-2	0.00089	0.3	0.2	-0.2	0.1		0.055	0.018	0.00034	0.006	0.14	0.013
AP-3 complex subunit beta-1	0.00097	0.1	0.1	-0.1	0.1		0.92	0.012	< 0.0001	0.012	0.92	0.06
Apolipoprotein A-I	0.0001	-0.1	0	0	0.2		0.082	0.014	0.00081	0.24	0.00027	0.00027
Apolipoprotein A-IV	0.0001	-0.2	0.2	-0.2	-0.1		0.0017	0.025	0.0032	0.0022	0.0027	0.28
Apolipoprotein E	0.0053	-0.2	0	-0.1	-0.2		0.047	0.076	0.23	0.12	0.047	0.06
Apoptosis inhibitor 5	0.002	0.1	0	-0.1	0.1		0.043	0.021	0.012	0.11	0.15	0.021
Apoptosis-associated speck-like protein containing a CARD	0.005	-0.1	0.2	0.2	0.2		0.009	0.009	0.0016	0.83	0.6	0.68
Apoptosis-inducing factor 1, mitochondrial	0.0031	0	0	0.2	0.2		0.42	0.025	0.043	0.037	0.01	0.47
Arginine--tRNA ligase, cytoplasmic	0.005	0.1	0.1	0	0.1		0.23	0.016	0.12	0.025	0.58	0.34
Armadillo repeat-containing protein 10	0.0019	0	0	-0.1	0.2		0.05	0.83	0.00063	0.05	0.05	0.05
Aromatic-L-amino-acid decarboxylase	0.00074	0.2	0	0.1	0.4		0.03	0.56	0.37	0.15	0.021	0.021
Aspartate aminotransferase, cytoplasmic	0.0001	-0.3	-0.1	0.1	0		0.00035	0.00035	< 0.0001	0.00057	0.00049	0.0023
Aspartate aminotransferase, mitochondrial	0.0001	0.1	-0.1	0	-0.1		0.00029	0.23	< 0.0001	0.0032	0.47	0.011
Aspartate--tRNA ligase, cytoplasmic	0.003	-0.1	0	-0.1	-0.1		0.0013	0.093	0.44	0.012	0.0047	0.22
Atlastin-3	0.00091	0.1	-0.1	-0.2	0		0.093	0.016	< 0.0001	0.0039	0.0054	0.00078
ATP synthase subunit alpha, mitochondrial	0.0001	0	0	0.1	0.1		0.34	< 0.0001	< 0.0001	< 0.0001	0.0031	0.022
ATP synthase subunit beta, mitochondrial	0.0001	-0.1	0	0.2	0.1		< 0.0001	< 0.0001	0.00035	0.00078	< 0.0001	0.47
ATPase family AAA domain-containing protein 3	0.001	-0.2	0	0.1	0		0.05	0.05	< 0.0001	0.51	0.081	0.51
ATP-citrate synthase	0.0001	0.1	-0.1	-0.1	0.3		< 0.0001	0.002	0.44	0.21	< 0.0001	< 0.0001
ATP-dependent (S)-NAD(P)H-hydrate dehydratase	0.00018	-0.2	-0.1	0.2	-0.1		0.064	0.0017	0.021	0.018	0.14	0.018
ATP-dependent RNA helicase A	0.0001	0	0.2	-0.4	0.1		0.0014	0.014	0.44	0.0016	0.036	0.0054
ATP-dependent RNA helicase DDX1	0.0001	0.2	0.3	-0.4	0.2		0.0017	0.0017	0.00078	0.0017	0.25	0.0017
ATP-dependent RNA helicase DDX3X	0.0001	0.2	0.2	-0.2	0		0.12	0.00035	0.34	0.00035	0.00035	0.0013
BAG family molecular chaperone regulator 2	0.0001	-0.2	-0.1	-0.6	-0.6		0.12	0.009	0.0021	0.009	0.009	0.17
BAG family molecular chaperone regulator 3	0.001	0	-0.1	-0.4	-0.3		0.078	0.0039	< 0.0001	0.0039	0.0039	1
Basal cell adhesion molecule	0.00033	-0.1	-0.3	-0.1	-0.1		0.0087	0.13	0.0039	0.0033	0.016	0.23
Basement membrane-specific heparan sulfate proteoglycan core protein	0.0001	0.2	-0.1	-0.2	-0.1		< 0.0001	< 0.0001	0.44	0.00022	0.19	0.00011
Basigin	0.0001	0	-0.1	0.3	0.2		0.17	0.009	0.0016	0.009	0.009	0.12
Beta-2-syntrophin	0.0001	0.1	-0.1	-0.6	-0.1		0.021	0.021	0.13	0.021	0.77	0.021
Beta-enolase	0.0001	-0.3	-0.3	0.7	0.4		0.0087	0.00078	0.05	0.00078	0.00078	0.0074
Beta-hexosaminidase subunit beta	0.0001	0	-0.1	0.4	0.4		0.13	0.0039	0.85	0.0039	0.0039	0.75
Bifunctional glutamate/proline--tRNA ligase	0.001	0.1	0	-0.2	0.1		0.71	0.028	0.12	0.0041	0.82	0.0032
Bifunctional polynucleotide phosphatase/kinase	0.006	0	-0.2	0.2	0.1		0.51	0.05	0.51	0.05	0.13	0.28
Bifunctional purine biosynthesis protein PURH	0.0001	0	0.3	0	0.2		< 0.0001	0.077	0.44	< 0.0001	0.0063	0.0026
Bifunctional UDP-N-acetylglucosamine 2-epimerase/N-acetylmannosamine kinase	0.0026	0	0.3	-0.3	0.2		0.0027	0.11	0.52	0.013	0.085	0.064
Biglycan	0.0003	0.3	0	-0.4	-0.1		0.05	0.05	0.043	0.05	0.05	0.05
Bile salt-activated lipase	0.001	-1.3	-2	2	-1.9		0.021	0.021	0.0035	0.021	1	0.021
CAD protein	0.001	0.1	0.1	-0.1	0.2		0.076	0.14	0.44	0.076	0.17	0.047
Cadherin-17	0.0001	-0.2	0	0.3	0.3		0.0033	0.00094	0.04	0.0014	0.00078	1
Calcium/calmodulin-dependent protein kinase type II subunit delta	0.005	0.3	0.3	-0.1	0.3		0.51	0.05	0.016	0.05	0.51	0.05
Calcium/calmodulin-dependent protein kinase type II subunit gamma	0.00062	0.2	0	-0.5	0		0.061	0.021	0.28	0.021	0.03	0.021
Calcium-activated chloride channel regulator 1	0.0001	-0.2	-0.1	0.7	0.6		< 0.0001	< 0.0001	< 0.0001	< 0.0001	< 0.0001	0.006
Calcium-binding mitochondrial carrier protein SCaMC-1	0.0001	-0.1	0.1	0.2	0.1		< 0.0001	< 0.0001	0.12	0.0067	0.038	0.015
Calpain-1 catalytic subunit	0.0001	0.1	0.1	-0.3	0.1		0.8	0.0017	0.0011	0.0017	0.7	0.0049
Calpain-2 catalytic subunit	0.00027	0.1	-0.1	-0.2	0		0.0015	0.00029	< 0.0001	0.021	0.14	0.076
Calponin-1	0.0001	-0.2	-0.1	-0.4	-0.3		0.01	0.0013	0.00057	< 0.0001	< 0.0001	0.45
Capping protein (Actin filament) muscle Z-line, alpha 1	0.0001	0	-0.1	0.1	0.1		0.035	0.021	0.12	0.0027	0.0027	0.41
Carbonic anhydrase 1	0.0001	-0.1	0	0.7	-0.9		0.0039	0.0039	0.011	0.0039	0.0039	0.0039
Carbonic anhydrase 2	0.0001	-0.2	0.1	0.2	0.2		0.00021	0.00029	0.0017	0.049	0.41	0.2
Carbonic anhydrase 3	0.0001	0.1	-0.5	0.3	1		0.0017	0.0017	0.014	0.0017	0.0017	0.0017
Carbonyl reductase [NADPH] 1	0.0004	-0.1	-0.1	0.1	0.1		0.17	0.0071	0.0036	0.0071	0.0017	0.57
Carboxylesterase 1C	0.0001	0.1	-0.1	0	0.3		0.01	0.055	0.009	0.75	0.0039	0.01
Carboxymethylenebutenolidase homolog	0.00052	-0.2	-0.1	0	0.1		0.05	0.05	0.4	0.081	0.05	0.83
Carboxypeptidase A1	0.001	-1.6	-2.6	2	-2.9		0.021	0.021	0.0039	0.021	0.77	0.021
Carboxypeptidase B1 (Tissue)	0.001	-1	-1.5	1.6	-1.5		0.009	0.009	0.32	0.009	0.25	0.009
Carboxypeptidase Q	0.0001	-0.3	0	0.3	0.3		0.021	0.021	0.05	0.021	0.021	0.77
Casein kinase II subunit alpha	0.0025	0.1	0.1	-0.3	0.1		0.89	0.021	0.0017	0.021	1	0.021
Caspase-1	0.00018	0.2	0.4	0.4	0.4		0.009	0.009	< 0.0001	0.92	0.076	0.12
Catenin alpha-1	0.0001	0	0.3	0.1	0.1		< 0.0001	0.00037	0.19	0.00011	< 0.0001	0.31
Catenin beta-1	0.0001	-0.1	0.1	-0.1	0		0.00016	0.031	0.26	0.0052	0.0041	0.2
CD166 antigen	0.00021	-0.1	-0.2	0	-0.1		0.46	0.028	0.48	0.009	0.009	0.009
Cell surface glycoprotein MUC18	0.00021	0	-0.2	-0.2	-0.1		0.0054	0.01	0.25	0.96	0.047	0.12
Ceruloplasmin	0.0001	0.1	0.2	-0.3	-0.1		0.016	0.009	0.12	0.009	0.012	0.009
cGMP-specific 3',5'-cyclic phosphodiesterase	0.005	0.2	0.1	0	0.2		0.061	0.043	0.44	0.15	0.061	0.043
Chloride anion exchanger	0.0001	-0.4	-0.4	1	0.3		0.66	0.05	0.44	0.05	0.05	0.05
Chondroitin sulfate proteoglycan 4	0.0001	0	-0.1	-0.1	-0.2		0.01	0.043	0.021	0.17	0.016	< 0.0001
Chromogranin-A	0.0028	-0.1	0.5	0.1	-0.1		0.05	0.05	0.024	0.05	0.05	0.05
Chymopasin	0.0001	-1.3	-1.8	2.5	-2.3		0.021	0.021	0.12	0.021	0.021	0.021
Chymotrypsin-like elastase family member 1	0.001	-0.9	-1.4	1.6	-1.3		0.009	0.009	0.00026	0.009	0.047	0.009
Chymotrypsinogen B	0.0001	-1.1	-2.8	2	-3.8		0.021	0.021	0.00078	0.021	0.67	0.021
Clathrin heavy chain 1	0.0001	0.1	0.1	-0.1	0.1		< 0.0001	0.013	0.093	< 0.0001	0.27	< 0.0001
Cluster of Acylcarnitine hydrolase	0.002	-0.3	-0.1	0.7	0.3		0.018	0.018	0.00078	0.018	0.018	0.018
Cluster of ADP-ribosylation factor 2	0.0023	0	0.3	0.1	0.2		0.013	0.16	0.13	0.22	0.11	0.75
Cluster of Fermitin family homolog 2	0.0001	0.1	-0.2	-0.5	-0.1		< 0.0001	< 0.0001	0.016	< 0.0001	0.00081	< 0.0001
Cluster of Fructose-bisphosphate aldolase A	0.00087	-0.2	-0.1	0	-0.2		0.0039	0.0039	< 0.0001	0.15	0.0039	0.016
Cluster of Gasdermin-C2	0.0001	-0.3	-0.2	0.4	0.4		0.12	0.009	0.47	0.009	0.009	0.17
Cluster of GTP:AMP phosphotransferase AK3, mitochondrial	0.00024	0	-0.1	0.1	0		0.037	0.016	0.25	0.0051	0.0051	0.15
Cluster of Myosin-11	0.0001	0.2	-0.4	-0.4	-0.2		< 0.0001	< 0.0001	0.12	0.18	0.0043	0.0043
Cluster of Ras-related protein Rap-2b	0.001	0.1	-0.1	0.2	0.3		0.021	0.021	0.021	0.021	0.021	0.31
Cluster of Tax_Id	0.001	-0.4	0.1	-0.5	0.3		0.0038	0.68	0.77	0.00067	0.41	0.0011
Cluster of Tax_Id	0.002	-0.4	0.1	0.5	0.2		< 0.0001	< 0.0001	0.51	< 0.0001	< 0.0001	< 0.0001
Coactosin-like protein	0.0001	0.1	-0.1	0.2	0.5		0.009	0.028	0.00035	0.009	0.009	0.009
Coagulation factor XIII A chain	0.00012	0.1	-0.1	-0.2	0		0.00078	0.0023	0.009	0.036	0.012	0.014
Coatomer subunit alpha	0.00029	0	0.1	-0.2	0.1		0.17	0.015	0.0039	0.00041	0.31	0.0041
Coatomer subunit beta	0.0042	0.1	0.1	0	0		0.061	0.28	0.0063	0.0035	0.00016	0.17
Coatomer subunit delta	0.0037	0	0.1	0.2	0		0.046	0.00078	0.05	0.036	0.29	0.016
Coatomer subunit gamma-1	0.00073	0.1	0.1	-0.1	0.1		0.0039	0.031	0.12	0.0023	0.016	0.17
Cofilin-1	0.00049	0.1	-0.1	-0.1	0.2		0.048	0.0017	0.0017	0.021	0.004	0.0017
Cofilin-2	0.00022	0.1	0	-0.4	-0.1		0.52	0.0039	0.00086	0.0039	0.016	0.037
Coiled-coil-helix-coiled-coil-helix domain-containing protein 3, mitochondrial	0.0017	-0.2	-0.1	0.2	0		0.05	0.05	0.00016	0.05	0.13	0.05
Collagen alpha-1(I) chain	0.0001	0.2	-0.1	0.1	0.5		0.009	0.12	0.00093	0.009	0.009	0.009
Collagen alpha-1(VI) chain	0.0001	0	0.7	-0.3	-0.3		< 0.0001	0.0018	0.074	< 0.0001	< 0.0001	0.27
Collagen alpha-1(XII) chain	0.0001	-0.1	0.1	-0.2	-0.2		0.00022	0.096	0.00094	0.00027	< 0.0001	0.32
Collagen alpha-1(XIV) chain	0.0001	-0.1	0	0.2	0.1		0.0067	< 0.0001	0.6	< 0.0001	0.0014	0.0067
Collagen alpha-2(VI) chain	0.0001	0	0.8	-0.3	-0.3		0.0039	0.055	0.67	0.0039	0.0039	0.63
Complement C3	0.0001	0.3	0	-0.8	-0.4		< 0.0001	< 0.0001	0.00017	< 0.0001	< 0.0001	< 0.0001
Complement factor B	0.001	0.1	-0.2	-0.5	0		0.05	0.05	0.0032	0.05	0.05	0.05
Constitutive coactivator of PPAR-gamma-like protein 1	0.002	0.1	0	-0.3	-0.1		1	0.05	0.51	0.05	0.13	0.05
Copper transport protein ATOX1	0.001	0	0.3	0	0.4		0.05	0.83	0.17	0.05	0.05	0.05
Core histone macro-H2A.1	0.0001	0.1	0	-0.6	0.5		0.56	0.021	0.0033	0.021	0.021	0.021
Coronin-1A	0.0001	0	-0.5	-0.1	0.4		0.021	0.67	0.016	0.021	0.021	0.021
Coronin-1C	0.0001	0.3	-0.1	-0.5	-0.1		0.0017	0.0017	0.016	0.0017	0.95	0.004
Corticosteroid 11-beta-dehydrogenase isozyme 2	0.0001	-0.6	0.8	-0.3	0.3		0.05	0.05	0.00035	0.05	0.05	0.05
Creatine kinase B-type	0.0001	-0.1	0.2	-0.4	-0.3		< 0.0001	< 0.0001	0.05	< 0.0001	< 0.0001	0.011
Creatine kinase M-type	0.0001	-0.2	0.3	-0.8	-0.5		0.009	0.009	0.05	0.009	0.009	0.009
Creatine kinase U-type, mitochondrial	0.0001	-0.3	0	0.5	0.4		0.0039	0.0039	0.12	0.0039	0.055	0.0065
C-terminal-binding protein 1	0.0053	-0.1	0	0.1	0		0.15	0.043	0.0033	0.083	0.39	0.021
Cullin-associated NEDD8-dissociated protein 1	0.0001	0.1	0	-0.2	0		0.12	0.00059	< 0.0001	0.00016	0.94	0.00054
Cysteine and glycine-rich protein 1	0.00011	0.3	0.1	-0.5	0		0.009	0.009	0.34	0.009	0.12	0.009
Cytochrome b-c1 complex subunit 1, mitochondrial	0.0001	-0.1	0	0.2	0.1		0.0058	< 0.0001	0.44	0.00072	0.0028	0.12
Cytochrome b-c1 complex subunit 2, mitochondrial	0.0001	0	0	0.3	0		0.065	0.00059	0.12	0.0027	0.12	0.00048
Cytochrome b-c1 complex subunit Rieske, mitochondrial	0.0001	-0.1	-0.1	0.2	0.1		0.055	0.0039	1	0.0039	0.016	0.0039
Cytochrome c oxidase subunit 2	0.002	-0.3	0.4	0.2	0.2		0.05	0.05	0.51	0.13	0.05	0.83
Cytochrome c oxidase subunit 4 isoform 1, mitochondrial	0.0001	-0.1	0.1	0.3	0.2		0.012	0.009	0.34	0.06	0.17	0.037
Cytochrome c, somatic	0.0001	0	0.1	-0.1	0.4		0.043	0.043	0.56	0.021	0.021	0.021
Cytoplasmic aconitate hydratase	0.0028	0.1	0.1	0.3	0.2		0.64	0.012	0.0014	0.0046	0.052	0.13
Cytoplasmic dynein 1 heavy chain 1	0.0001	0.1	-0.1	-0.2	0.1		< 0.0001	< 0.0001	0.022	< 0.0001	< 0.0001	< 0.0001
Cytoplasmic FMR1-interacting protein 1	0.0001	0.1	0	-0.2	0.1		0.0022	0.00017	0.00016	< 0.0001	0.0039	0.00034
Cytoskeleton-associated protein 4	0.0001	0	0	-0.3	0		0.2	0.00057	0.0017	0.0023	0.63	0.0041
Cytosol aminopeptidase	0.0001	0	0	0.3	0		0.15	< 0.0001	< 0.0001	0.00034	0.0094	< 0.0001
Cytosolic 10-formyltetrahydrofolate dehydrogenase	0.0001	0.1	-0.1	0.4	0.3		< 0.0001	< 0.0001	< 0.0001	< 0.0001	< 0.0001	0.0052
Cytosolic 5'-nucleotidase 3A	0.001	-0.2	0.1	0.1	0.2		0.021	0.021	0.51	0.67	0.043	0.083
Cytosolic acyl coenzyme A thioester hydrolase	0.00016	-0.1	0.2	0	0		0.021	0.021	0.073	0.021	0.021	0.25
Cytosolic non-specific dipeptidase	0.0001	0.2	-0.1	0.1	0.1		< 0.0001	0.017	0.15	< 0.0001	< 0.0001	0.38
D-3-phosphoglycerate dehydrogenase	0.00045	-0.3	-0.4	0.7	-0.1		1	0.021	0.44	0.021	0.15	0.021
DAZ-associated protein 1	0.0043	0.2	0.2	0.3	0.1		0.05	0.05	0.34	0.38	0.05	0.05
D-dopachrome decarboxylase	0.0001	-0.2	0	0.3	0.2		0.009	0.009	0.83	0.009	0.076	0.047
Decorin	0.0001	0.1	0.1	-0.3	0.3		0.34	0.0017	0.021	0.0017	0.006	0.0017
Dehydrogenase/reductase SDR family member 11	0.001	-0.1	0.1	0.3	0.2		0.021	0.021	0.0065	0.021	0.043	0.25
Dehydrogenase/reductase SDR family member 4	0.002	0.2	0	0.1	0		0.009	0.3	0.05	0.076	0.46	0.047
Deleted in maliant brain tumors 1 protein	0.00014	-1.1	-0.5	0.6	-0.8		0.021	0.021	0.0039	0.021	0.021	0.021
Delta(3,5)-Delta(2,4)-dienoyl-CoA isomerase, mitochondrial	0.0001	0	0.3	-0.1	0		0.00078	0.14	0.6	0.00078	0.00078	0.074
Delta-1-pyrroline-5-carboxylate synthase	0.0001	0.3	0.4	-0.1	0		0.009	0.009	0.15	0.009	0.009	0.46
Delta-sarcoglycan	0.0001	0.1	-0.2	-0.1	-0.1		0.0039	0.025	0.12	0.34	0.055	0.75
Deoxynucleoside triphosphate triphosphohydrolase SAMHD1	0.0001	0.1	0	-0.3	0.5		0.059	0.0087	0.12	0.0011	0.0063	0.0011
Desmin	0.0001	0	-0.3	-0.4	-0.4		< 0.0001	< 0.0001	0.13	< 0.0001	< 0.0001	0.46
Desmoplakin	0.003	-0.4	0	-0.1	-0.2		0.021	0.021	0.39	1	0.03	0.043
Destrin	0.0001	0.2	0.2	-0.1	0.1		0.51	0.0023	0.0063	0.0017	0.1	0.024
Dihydropyrimidinase-related protein 1	0.00078	0	-0.1	-0.3	-0.1		0.15	0.021	0.037	0.021	0.89	0.083
Dihydropyrimidinase-related protein 3	0.0001	0	-0.1	-0.3	-0.1		0.97	0.014	0.12	0.0012	0.16	0.03
Dimethylaniline monooxygenase [N-oxide-forming] 2	0.0001	0.4	-0.2	-0.3	0.2		0.0039	0.0039	0.23	0.0039	0.0039	0.0039
Dipeptidase 1	0.002	-0.1	0	-0.3	-0.1		0.043	0.021	0.009	0.021	0.15	0.043
Dipeptidyl peptidase 3	0.005	0	0.2	0.1	0.2		0.0017	0.0088	0.012	0.085	0.7	0.37
DNA damage-binding protein 1	0.0001	0	-0.1	0	0.1		0.0011	0.66	0.037	0.039	< 0.0001	0.1
DnaJ homolog subfamily B member 11	0.00022	0	-0.1	0.4	0		0.21	0.009	0.2	0.009	0.037	0.009
DnaJ homolog subfamily C member 3	0.00084	-0.1	0	0.4	-0.1		0.047	0.009	0.41	0.009	0.076	0.009
Dolichyl-diphosphooligosaccharide--protein glycosyltransferase subunit 1	0.0001	0	0.1	0.2	0		0.00025	< 0.0001	0.05	0.00025	0.27	< 0.0001
Dolichyl-diphosphooligosaccharide--protein glycosyltransferase subunit 2	0.0001	0	0.1	0.3	0.1		0.012	0.0016	0.28	0.012	0.059	0.021
Dolichyl-diphosphooligosaccharide--protein glycosyltransferase subunit DAD1	0.001	-0.1	0	0.4	0.1		0.05	0.05	0.18	0.05	0.83	0.05
Drebrin-like protein	0.001	-0.1	0	0.2	-0.1		0.0039	0.0039	0.058	0.025	0.055	0.0082
Dual specificity protein phosphatase 3	0.0043	0.1	0.2	-0.1	0		0.05	0.28	0.0017	0.05	0.05	0.05
Dynamin-2	0.00022	0.2	0.1	-0.1	0.2		0.92	0.012	0.25	0.012	0.037	0.009
Dystrobrevin alpha	0.0001	0.2	-0.2	-0.3	-0.1		0.009	0.009	0.46	0.028	0.12	0.009
Dystrophin	0.0001	0	-0.2	-0.4	-0.1		0.00088	0.00016	0.75	0.0012	0.014	0.00051
Echinoderm microtubule-associated protein-like 1	0.002	0.1	-0.2	-0.4	-0.2		0.031	0.0082	0.83	0.055	0.47	0.02
Ectonucleoside triphosphate diphosphohydrolase 1	0.00049	0.2	-0.2	-0.1	0.1		0.05	0.05	0.009	0.05	0.05	0.05
Ectonucleoside triphosphate diphosphohydrolase 2	0.0001	-0.2	-0.4	-0.1	-0.3		0.009	0.016	0.63	0.009	0.028	0.009
EH domain-containing protein 1	0.004	0.1	-0.1	-0.1	0.1		0.009	0.047	0.15	0.12	0.009	0.012
EH domain-containing protein 2	0.0001	0.2	-0.1	-0.5	0.1		< 0.0001	< 0.0001	0.17	0.0012	< 0.0001	< 0.0001
EH domain-containing protein 4	0.0001	0.2	-0.1	-0.2	0		0.00033	0.00077	0.0017	0.023	0.5	0.0082
ELAV-like protein 1	0.00033	0.1	-0.1	-0.1	0.1		0.0082	0.01	0.4	0.055	0.0082	0.0051
Electron transfer flavoprotein subunit alpha, mitochondrial	0.001	-0.1	0.1	0.1	0.1		0.00049	0.0023	0.021	0.57	0.4	0.31
Electron transfer flavoprotein subunit beta	0.0001	-0.2	0	0.2	0.1		0.00057	< 0.0001	0.02	0.0014	0.028	0.011
Elongation factor 1-delta	0.00019	-0.1	-0.1	0.1	-0.1		0.048	0.006	0.34	0.004	0.95	0.0017
Elongation factor 1-gamma	0.0039	0.1	0.1	0.2	0		0.56	0.25	0.67	0.15	0.39	0.083
Elongation factor 2	0.0001	0.2	0.2	0.1	0		0.86	0.39	0.34	0.061	< 0.0001	0.00068
Elongation factor Tu, mitochondrial	0.0001	0	0	0.2	0		0.054	< 0.0001	0.34	0.0014	0.0032	0.02
Endoplasmic reticulum aminopeptidase 1	0.0035	0	0.1	0	0.2		0.01	0.38	0.00094	0.52	0.078	0.01
Endoplasmic reticulum resident protein 44	0.002	0.1	0.2	0.4	0.2		0.0087	0.027	0.05	0.32	0.074	0.1
Endoplasmin	0.0001	0.1	-0.1	0.1	0.1		0.00089	0.069	0.0031	< 0.0001	< 0.0001	0.27
Enoyl-CoA delta isomerase 1, mitochondrial	0.0001	-0.1	0	0.2	0.1		0.009	0.009	0.012	0.009	0.46	0.009
Enoyl-CoA hydratase, mitochondrial	0.0001	0	0.2	0.4	0.3		0.0027	0.0017	0.0078	0.0088	0.018	0.021
Epiplakin	0.0001	-0.2	0.2	0.4	0.1		< 0.0001	< 0.0001	0.0081	< 0.0001	0.62	< 0.0001
Epithelial cell adhesion molecule	0.00018	-0.1	0.2	0.4	0.4		0.05	0.05	0.027	0.05	0.05	1
Epoxide hydrolase 1	0.0001	0.2	-0.2	-0.4	0.1		0.0039	0.0039	0.56	0.037	0.0065	0.0065
Erlin-2	0.00064	0	0	0.1	0.2		0.83	0.024	0.028	0.031	0.00067	0.96
Erythrocyte band 7 integral membrane protein	0.0001	-0.1	-0.3	0	-0.2		0.021	0.021	0.12	0.021	0.021	0.03
Eukaryotic peptide chain release factor subunit 1	0.0001	0.2	0.1	-0.1	0.2		0.87	0.0039	0.53	0.0039	0.031	0.0039
Eukaryotic translation initiation factor 2 subunit 1	0.0001	0	0	0.3	0		0.13	0.00078	0.25	0.00078	0.059	0.00078
Eukaryotic translation initiation factor 3 subunit A	0.00058	0.1	0.1	-0.2	0.1		0.048	0.0088	0.13	0.006	0.85	0.0088
Eukaryotic translation initiation factor 3 subunit B	0.002	0	0.1	0.1	0		0.0017	0.0017	0.12	0.22	0.085	0.0017
Eukaryotic translation initiation factor 3 subunit H	0.004	0	0	0.2	0		0.46	0.037	0.021	0.037	0.25	0.022
Eukaryotic translation initiation factor 3 subunit I	0.003	0.1	0.1	0.3	0.1		1	0.016	0.25	0.0039	0.52	0.025
Exportin-1	0.003	0.2	0.1	-0.2	0.2		0.076	0.016	0.12	0.028	0.25	0.009
Exportin-2	0.00052	0.1	0	-0.2	0.1		0.17	0.0023	0.12	0.012	0.64	0.027
Extended synaptotagmin-2	0.002	0	-0.2	-0.3	-0.2		0.004	0.004	0.25	0.41	0.41	0.65
F-actin-capping protein subunit alpha-2	0.00058	0	-0.1	0	0		0.0039	0.2	0.11	0.15	0.016	0.42
Far upstream element-binding protein 2	0.0001	-0.1	0	0.1	0		0.00021	< 0.0001	0.0039	0.0023	0.97	0.017
Farnesyl pyrophosphate synthase	0.002	0.2	0.2	-0.1	0.2		0.25	0.009	0.00078	0.009	0.6	0.009
Fatty acid synthase	0.0001	0.1	-0.1	-0.1	0.3		0.00021	0.0029	0.17	0.13	< 0.0001	< 0.0001
Fatty acid-binding protein, adipocyte	0.0001	-0.3	-0.2	0.4	0.8		0.0065	0.0039	0.016	0.0039	0.0039	0.0039
Ferritin light chain 1	0.0001	-0.8	0.2	0.3	0.1		0.0039	0.0039	0.055	0.093	0.13	0.016
Fibrinogen gamma chain	0.0001	0	0.6	-0.4	-0.8		0.05	0.05	0.021	0.05	0.05	0.05
Fibronectin	0.0001	0.2	-0.1	-0.3	-0.5		< 0.0001	< 0.0001	0.009	< 0.0001	< 0.0001	< 0.0001
Fibulin-5	0.00067	0	-0.2	0.2	-0.1		0.0073	0.006	0.12	0.0017	0.37	0.0017
Filamin, alpha	0.0001	0.3	-0.2	-0.4	-0.1		< 0.0001	< 0.0001	0.12	< 0.0001	< 0.0001	< 0.0001
Filamin-B	0.0001	0	0.1	0.1	0.1		< 0.0001	< 0.0001	0.41	0.04	0.34	0.3
Filamin-C	0.0001	0.2	-0.2	-0.4	-0.1		< 0.0001	< 0.0001	0.58	< 0.0001	0.0017	< 0.0001
Flotillin-2	0.0001	0	-0.2	-0.1	-0.1		< 0.0001	0.089	0.028	0.00053	0.00072	0.074
Four and a half LIM domains protein 1	0.0018	0.6	0	-0.4	0.3		0.05	0.05	0.34	0.05	0.28	0.05
Fructose-1,6-bisphosphatase isozyme 2	0.0001	0	0.2	0.4	0.2		0.021	0.021	0.25	0.021	0.083	0.021
Fructose-bisphosphate aldolase B	0.0001	0.6	-0.2	-0.1	-0.1		0.00078	0.00078	0.0003	0.0023	0.0039	0.92
Galactokinase	0.00035	-0.2	-0.2	0	-0.2		0.021	0.021	0.53	0.021	0.67	0.021
Galectin-2	0.001	2.5	-2.2	-1.6	-2.2		0.021	0.021	0.043	0.021	0.39	0.021
Galectin-3	0.0001	0.1	0.1	0.5	0.3		0.77	0.021	0.083	0.021	0.021	0.021
Galectin-3-binding protein	0.005	0	-0.2	0	0.1		0.06	0.6	0.05	0.022	0.009	0.12
Galectin-4	0.0001	-0.1	0.3	0.5	0.3		0.0017	0.0017	0.06	0.0017	0.41	0.004
Gamma-enolase	0.00061	-0.3	0	-0.3	0		0.009	0.75	0.0017	0.009	0.92	0.009
Gamma-glutamyl hydrolase	0.0001	0.1	-0.1	0.5	0.3		0.009	0.009	0.035	0.009	0.009	0.12
Gamma-glutamyltransferase 5	0.001	0.1	-0.3	-0.2	-0.1		0.05	0.05	0.46	0.05	0.05	0.19
Gamma-synuclein	0.0001	-0.4	-0.1	-0.3	-0.1		0.009	0.06	0.12	0.009	0.35	0.009
GDP-L-fucose synthase	0.004	0	0.3	0.1	0.1		0.021	0.021	0.0039	0.083	0.11	0.56
GDP-mannose 4,6 dehydratase	0.0001	0.2	0.5	0	0.1		0.0039	0.016	0.05	0.0039	0.0039	0.025
General vesicular transport factor p115	0.004	-0.1	-0.1	0.1	0		0.2	0.013	0.12	0.085	0.0041	0.27
Glial fibrillary acidic protein	0.0001	-0.2	-0.1	-0.4	-0.6		0.0046	0.00078	0.0017	0.00078	0.00078	0.012
Glucose-6-phosphate isomerase	0.001	0.1	0.1	-0.4	0.1		0.05	0.05	0.83	0.05	0.05	0.05
Glutaminase kidney isoform, mitochondrial	0.0036	0.2	0.2	0.1	0.2		0.25	0.19	0.009	0.11	0.77	0.021
Glutamine--fructose-6-phosphate aminotransferase [isomerizing] 1	0.0001	0.2	0.4	-0.1	0.2		0.00016	0.0082	0.11	0.00016	0.00021	0.0015
Glutathione reductase, mitochondrial	0.0001	0.2	-0.1	0.2	0.3		0.0054	0.29	0.009	0.0074	0.00078	0.96
Glutathione S-transferase Mu 1	0.00037	0.1	0	0.4	0.2		0.83	0.05	0.46	0.05	0.05	0.05
Glutathione S-transferase Mu 2	0.001	0	0	0.5	0.2		0.56	0.021	0.021	0.021	0.043	0.021
Glutathione S-transferase omega-1	0.0001	-0.2	0	0.3	0.3		0.021	0.021	0.021	0.021	0.021	0.77
Glutathione S-transferase theta 3	0.00025	-0.2	0	0.1	-0.1		0.05	0.05	0.12	0.05	0.05	0.05
Glutathione synthetase	0.0001	-0.1	0.1	0.3	0.2		0.0013	0.00041	0.0051	0.07	0.0017	0.79
Glycerol kinase	0.0014	-0.2	-0.3	0.5	0.1		0.56	0.021	0.0073	0.021	0.021	0.021
Glycerol-3-phosphate dehydrogenase [NAD(+)], cytoplasmic	0.0001	0.4	-0.3	0	0.2		0.009	0.009	0.093	0.016	0.016	0.028
Glycerol-3-phosphate dehydrogenase, mitochondrial	0.0001	-0.1	-0.1	0.2	0.1		0.75	0.0065	0.26	0.0065	0.037	0.055
Glycine--tRNA ligase	0.0002	0	0.1	0.2	-0.1		0.0051	0.0039	0.12	0.045	0.0065	0.0039
Glyoxalase domain-containing protein 4	0.0001	-0.1	0	0.1	0.1		0.0017	0.0017	0.0065	0.28	0.14	0.9
Growth factor receptor-bound protein 2	0.003	0	0	0.1	0.1		0.26	0.15	0.12	0.055	0.01	0.2
GTP-binding protein SAR1b	0.0031	0.1	0.1	0.3	-0.1		0.51	0.19	0.44	0.05	0.05	0.05
Guanine deaminase	0.001	0.1	0.1	0.4	0.2		0.92	0.009	0.38	0.009	0.46	0.009
Guanine nucleotide-binding protein subunit beta-2-like 1	0.0001	0	0	0.3	0		0.017	0.00018	0.05	0.00044	0.061	0.00021
Guanylate cyclase soluble subunit beta-1	0.001	0	-0.2	-0.2	-0.1		0.021	0.083	0.44	0.56	0.021	0.15
H-2 class II histocompatibility antigen, A beta chain	0.0001	-0.2	-0.4	0.4	0.3		0.05	0.05	0.025	0.05	0.05	0.28
Haptoglobin	0.0001	-0.1	0.5	-2.4	-1.3		0.0039	0.0039	0.01	0.0039	0.0039	0.0039
Heat shock 70 kDa protein 1A	0.0001	-0.1	0.2	-0.3	-0.2		< 0.0001	0.00028	0.021	< 0.0001	< 0.0001	0.0077
Heat shock protein 105 kDa	0.0001	0.1	0.2	-0.2	-0.1		0.0012	0.00021	0.004	0.00016	0.00016	0.038
Heat shock protein 75 kDa, mitochondrial	0.00017	-0.1	0.1	0.1	0		0.0039	0.0039	0.12	0.2	0.045	0.0065
Heat shock protein beta-1	0.0001	0	0.1	-0.6	-0.4		0.0017	0.0017	0.28	0.0017	0.0017	0.0017
Heat shock protein beta-7	0.00078	-0.1	-0.2	-0.4	-0.3		0.009	0.009	0.25	0.009	0.009	0.53
Heat shock protein HSP 90-alpha	0.0001	0.1	0.1	0	0.1		0.014	0.0039	0.12	0.00084	0.21	< 0.0001
Heat shock protein HSP 90-beta	0.004	0.2	0.1	0.1	0.3		0.041	0.089	0.021	0.31	0.0032	0.034
Heat shock-related 70 kDa protein 2	0.0001	0.4	-0.2	-0.4	-0.1		0.00078	0.00078	0.031	0.0033	0.12	0.00078
Heterogeneous nuclear ribonucleoprotein U	0.0001	0.1	0.2	-0.1	0.4		0.016	0.0065	0.25	0.0039	0.0039	0.0039
Heterogeneous nuclear ribonucleoproteins A2/B1	0.0013	0	0	0.2	-0.1		0.33	0.0046	0.31	0.034	0.76	0.00029
Histone H1.0	0.001	0.5	0.3	-0.4	0.8		0.51	0.05	0.51	0.05	0.05	0.05
Histone H4	0.0001	0.2	0.2	-0.8	0.7		0.77	0.021	0.083	0.021	0.083	0.021
Hydroxyacid oxidase 2	0.0001	-0.3	0	0.4	0.1		0.009	0.009	0.28	0.009	0.016	0.016
Hydroxymethylglutaryl-CoA synthase, mitochondrial	0.0001	-0.6	1	-0.5	-0.7		0.0039	0.037	0.6	0.0039	0.0039	0.016
Hypoxanthine-guanine phosphoribosyltransferase	0.00084	0	0.2	0.3	0.1		0.05	0.05	0.53	0.28	0.05	0.05
Hypoxia up-regulated protein 1	0.0001	0	0.1	0.4	0		0.00027	< 0.0001	0.004	< 0.0001	0.0035	< 0.0001
Ig kappa chain C region	0.0001	0	-0.4	0.3	0.5		0.05	0.05	0.12	0.05	0.05	0.05
Ig mu chain C region secreted form	0.00027	-0.1	-0.4	0	0.2		0.047	0.009	0.05	0.009	0.009	0.35
Importin subunit beta-1	0.0001	0.1	-0.1	-0.1	0.1		< 0.0001	0.00016	0.021	0.63	0.00014	0.0013
Importin-7	0.00011	0.2	0	-0.2	0.1		0.0065	0.0065	0.021	0.016	0.11	0.055
Inactive pancreatic lipase-related protein 1	0.001	-1.6	-2.6	2.2	-2.9		0.021	0.021	0.57	0.021	0.39	0.021
Inhibitor of nuclear factor kappa-B kinase-interacting protein	0.002	0	-0.3	-0.1	-0.2		0.05	0.38	0.7	0.05	0.05	0.05
Inorganic pyrophosphatase	0.00093	0.1	0.2	0.3	0.4		0.29	0.00078	0.83	0.031	0.014	0.34
Inorganic pyrophosphatase 2, mitochondrial	0.001	-0.1	0.2	0.3	0		0.006	0.0017	0.0051	0.13	0.025	0.0017
Inosine-5'-monophosphate dehydrogenase 2	0.0001	0	0.1	0.2	-0.2		0.083	0.083	0.021	0.15	0.021	0.021
Insulin-degrading enzyme	0.002	0	0	-0.2	0.1		0.77	0.021	0.77	0.021	0.25	0.021
Integrin alpha-1	0.0002	0	-0.1	-0.1	0		0.0008	0.015	0.25	0.63	0.0088	0.012
Integrin alpha-2	0.0015	-0.1	0.3	0.1	0.1		0.009	0.009	0.53	0.009	0.028	0.83
Integrin alpha-5	0.0001	0.3	-0.1	-0.3	-0.1		< 0.0001	< 0.0001	0.021	0.00049	0.31	0.0089
Integrin alpha-V	0.0001	0.1	-0.1	-0.1	0		< 0.0001	0.00062	0.083	0.38	0.0011	0.089
Integrin beta-2	0.0001	0.1	-0.2	0.1	0.1		0.01	0.15	0.021	0.0039	0.0039	0.47
Integrin beta-3	0.0001	0.2	-0.1	-0.1	0		0.0088	0.0022	0.00078	0.8	0.048	0.035
Integrin beta-4	0.0001	-0.1	0	0.1	0		0.0012	< 0.0001	0.58	0.03	0.055	0.0063
Integrin beta-5	0.005	0	-0.2	0	0.1		0.17	0.25	0.56	0.047	0.009	0.095
Integrin-linked protein kinase	0.0002	0	-0.2	-0.5	-0.1		0.013	0.0088	0.043	0.0073	0.0027	0.0017
Inter alpha-trypsin inhibitor, heavy chain 4	0.0001	0.4	0.4	-0.9	-0.6		0.009	0.009	0.35	0.009	0.009	0.037
Inter-alpha-trypsin inhibitor heavy chain H3	0.0001	0	0.4	-0.7	-0.5		0.05	0.05	0.05	0.05	0.05	0.05
Interferon-induced guanylate-binding protein 2	0.00033	-0.1	0	-0.3	0.2		0.05	0.05	0.05	0.05	0.05	0.05
Isobutyryl-CoA dehydrogenase, mitochondrial	0.0001	-0.1	0	0.4	0.1		0.0082	0.0039	0.00078	0.0039	0.013	0.0039
Isocitrate dehydrogenase [NAD] subunit alpha, mitochondrial	0.0001	0.1	0.1	0.4	0.3		0.17	0.00035	0.51	0.00035	0.01	0.015
Isocitrate dehydrogenase [NAD] subunit gamma 1, mitochondrial	0.003	0	0	-0.1	0.3		0.83	0.081	0.05	0.51	0.05	0.05
Isocitrate dehydrogenase [NADP] cytoplasmic	0.0001	-0.1	0.2	0.2	0.1		0.0002	< 0.0001	0.28	0.67	0.25	0.17
Isocitrate dehydrogenase [NADP], mitochondrial	0.0001	0.1	0.1	-0.1	0.2		0.096	0.0032	0.15	0.00088	0.88	0.0032
Isocitrate dehydrogenase 3 (NAD+) beta	0.0001	0	0	-0.1	0.3		0.42	0.025	0.44	0.016	0.0039	0.0039
Isopentenyl-diphosphate Delta-isomerase 1	0.001	0.4	0.5	0.3	0.7		0.05	0.51	0.021	0.05	0.05	0.05
Isovaleryl-CoA dehydrogenase, mitochondrial	0.00028	-0.1	0.1	0.2	0.1		0.0015	0.00035	0.076	0.019	0.047	0.31
Kinesin-1 heavy chain	0.0001	0.1	-0.1	-0.3	0		0.00067	0.00035	0.51	0.00035	0.038	0.00067
Kininogen-1	0.0001	0.2	0.5	-0.2	0		0.021	0.083	0.56	0.021	0.021	0.083
KN motif and ankyrin repeat domain-containing protein 2	0.00045	0	-0.2	-0.3	-0.2		0.0031	0.038	0.021	0.17	0.54	0.54
Lambda-crystallin homolog	0.0001	-0.2	0.1	0.3	0.1		0.00078	0.00078	0.046	0.0063	0.25	0.00078
Lamin-B1	0.0001	-0.1	-0.2	0	0		0.0016	< 0.0001	0.92	< 0.0001	< 0.0001	0.82
Lamin-B2	0.0001	-0.1	-0.1	0.1	0		0.73	< 0.0001	0.25	< 0.0001	< 0.0001	0.00019
Laminin subunit alpha-2	0.00055	0	-0.1	0	0		< 0.0001	0.42	0.19	0.18	0.53	0.053
Laminin subunit alpha-4	0.0001	0.2	-0.2	-0.1	0		< 0.0001	0.00039	0.037	0.073	0.004	0.11
Laminin subunit alpha-5	0.0001	0	-0.2	-0.2	-0.1		< 0.0001	< 0.0001	0.63	0.79	0.11	0.46
Laminin subunit beta-1	0.0001	0.1	-0.1	-0.1	0		< 0.0001	< 0.0001	0.021	0.33	0.025	0.73
Laminin subunit beta-2	0.0001	-0.1	-0.2	-0.2	-0.3		< 0.0001	0.0024	0.15	0.015	0.046	< 0.0001
Laminin subunit gamma-1	0.0001	0	-0.2	-0.1	-0.1		< 0.0001	< 0.0001	0.12	0.26	0.0003	0.46
Latent-transforming growth factor beta-binding protein 4	0.00012	0.1	-0.1	0	-0.1		0.00088	0.88	0.05	0.011	0.2	0.0012
Leiomodin-1	0.0001	0.3	-0.1	-0.3	0		0.00035	0.00035	0.28	0.0054	0.013	0.00035
LETM1 and EF-hand domain-containing protein 1, mitochondrial	0.0001	-0.1	0.1	0.2	0.1		< 0.0001	< 0.0001	0.0039	0.094	0.38	0.039
Leucine-rich PPR motif-containing protein, mitochondrial	0.0001	0	0.3	-0.2	-0.1		0.00021	0.0014	0.51	< 0.0001	0.00014	0.12
Leukocyte elastase inhibitor A	0.0001	-0.1	0.1	0.4	0.3		< 0.0001	< 0.0001	0.12	< 0.0001	< 0.0001	0.0088
Leukotriene A-4 hydrolase	0.0001	0	0.1	-0.1	0.2		0.013	0.077	0.021	0.00011	0.00016	< 0.0001
LIM domain-binding protein 3	0.00025	0.2	-0.2	-0.4	-0.3		0.021	0.021	0.021	0.021	0.021	0.083
Lipoamide acyltransferase component of branched-chain alpha-keto acid dehydrogenase complex, mitochondrial	0.0001	0	0	0.5	0.3		1	0.009	0.021	0.009	0.047	0.06
L-lactate dehydrogenase A chain	0.00072	0	0.1	0	0.1		0.00078	0.92	0.0027	0.0063	0.6	0.016
L-lactate dehydrogenase B chain	0.002	0	0.1	-0.5	-0.3		0.021	0.021	0.56	0.021	0.021	0.39
Long-chain specific acyl-CoA dehydrogenase, mitochondrial	0.0001	-0.1	0	-0.3	0.1		0.0039	0.0039	0.16	0.0039	0.69	0.0039
Long-chain-fatty-acid--CoA ligase 1	0.001	0.1	-0.3	-0.3	0.4		0.05	0.05	< 0.0001	1	0.05	0.05
Lupus La protein homolog	0.001	0.4	0.1	-0.3	0.6		0.51	0.05	0.13	0.05	0.05	0.05
Lysosomal alpha-mannosidase	0.0001	-0.2	-0.1	0.2	0.2		0.016	0.009	0.17	0.009	0.016	0.83
m7GpppX diphosphatase	0.0001	0	0.1	0.2	0.3		0.083	0.00078	0.028	0.052	0.0023	0.0087
Macrophage mannose receptor 1	0.00026	0.3	0	0.2	0.1		0.004	0.14	0.11	0.0027	0.22	0.14
Major vault protein	0.0001	0	0.1	0.3	0.1		0.0005	< 0.0001	0.12	0.00011	0.12	0.0024
Malate dehydrogenase, cytoplasmic	0.0001	-0.1	0.1	0.1	0		0.00057	0.00093	0.12	0.69	0.0011	0.00093
Malate dehydrogenase, mitochondrial	0.00013	0.1	0	0.1	0		0.00011	0.043	0.12	< 0.0001	0.013	0.0051
Maleylacetoacetate isomerase	0.002	0	-0.2	0.1	0.4		0.043	0.39	0.076	0.043	0.021	0.021
Mannose-6-phosphate isomerase	0.002	-0.1	0	0.2	0.1		0.15	0.021	0.009	0.021	0.47	0.021
Matrin-3	0.00018	0.2	0.3	-0.2	0.1		0.021	0.021	1	0.021	0.021	0.021
MCG11326, isoform CRA_b	0.004	0.1	0.1	0.3	0.1		0.75	0.009	0.12	0.028	0.6	0.047
MCG13663, isoform CRA_a	0.0001	0	-0.2	0.1	0		0.01	0.17	0.44	0.0039	0.0039	0.3
Medium-chain specific acyl-CoA dehydrogenase, mitochondrial	0.0001	-0.1	0	0.3	0.1		0.022	0.009	0.016	0.009	0.012	0.047
Membrane primary amine oxidase	0.0001	0	-0.3	-0.1	0		< 0.0001	0.017	0.00016	0.0023	0.00018	0.015
Mesencephalic astrocyte-derived neurotrophic factor	0.001	0.1	-0.1	0.4	-0.1		0.05	0.05	0.076	0.05	0.51	0.05
Metal transporter CNNM4	0.0001	-0.2	-0.1	0.5	0.3		0.076	0.009	0.22	0.009	0.009	0.009
Methylmalonate-semialdehyde dehydrogenase [acylating], mitochondrial	0.0001	-0.1	-0.2	0.3	0.2		0.039	0.00011	0.021	< 0.0001	< 0.0001	0.0028
Microtubule-associated protein 4	0.0005	0.1	0	-0.2	0		0.0027	0.0049	0.05	0.11	0.34	0.085
Microtubule-associated protein 6	0.0001	-0.1	-0.4	-0.3	-0.2		0.021	0.021	0.05	1	0.021	0.021
Mitochondrial peptide methionine sulfoxide reductase	0.0008	-0.2	0.2	0.2	0		0.021	0.021	0.58	0.47	0.021	0.021
Mitogen-activated protein kinase kinase kinase MLT	0.005	0	0	-0.4	-0.2		0.13	0.05	0.0039	0.05	0.05	0.38
Mucin-2 (Fragments)	0.0001	-0.3	0.5	0.2	0.2		0.00035	0.00035	0.39	0.0023	0.00035	0.69
Multidrug resistance protein 1A	0.001	0	-0.2	0.5	0.1		0.05	0.05	0.12	0.05	0.05	0.05
Murinoglobulin-1	0.0001	-0.1	0.1	0	0.2		0.00077	0.47	0.15	0.017	0.00016	0.00051
Myb-binding protein 1A	0.0001	0.1	0.2	-0.2	0.4		0.05	0.05	0.12	0.05	0.05	0.05
Myc box-dependent-interacting protein 1	0.0002	0	-0.1	0	0.2		0.043	1	0.89	0.56	0.021	0.021
Myosin light chain kinase, smooth muscle	0.0001	0.2	-0.1	-0.5	-0.1		< 0.0001	< 0.0001	0.11	< 0.0001	0.81	< 0.0001
Myosin light polypeptide 6	0.0001	0.1	-0.2	-0.3	-0.2		0.00035	0.00035	0.46	0.0092	0.0054	0.35
Myosin-14	0.0001	-0.3	0.1	0.3	0		< 0.0001	< 0.0001	0.03	< 0.0001	< 0.0001	< 0.0001
Na(+)/H(+) exchange regulatory cofactor NHE-RF1	0.0001	0.2	-0.2	0.3	0		0.021	0.19	0.12	0.021	0.021	0.021
N-acetylgalactosaminyltransferase 7	0.003	-0.2	0.5	0.1	0.1		0.05	0.05	0.47	0.05	0.05	0.83
N-acetylneuraminic acid synthase (Sialic acid synthase)	0.00022	0	0.4	0.3	0.3		0.009	0.009	0.12	0.6	0.12	0.92
NADH dehydrogenase [ubiquinone] 1 alpha subcomplex subunit 10, mitochondrial	0.0001	-0.1	-0.1	0.1	0		0.018	0.00094	0.095	0.0046	0.92	0.0011
NADH dehydrogenase [ubiquinone] 1 alpha subcomplex subunit 2	0.001	-0.1	-0.1	0.2	0.1		0.83	0.05	0.05	0.05	0.05	0.05
NADH dehydrogenase [ubiquinone] 1 alpha subcomplex subunit 6	0.001	0	0	-0.1	0.3		0.83	0.05	0.28	0.05	0.05	0.05
NADH dehydrogenase [ubiquinone] flavoprotein 1, mitochondrial	0.002	0.1	0.2	0	0.2		0.014	0.23	0.51	0.018	0.074	0.014
NADH dehydrogenase [ubiquinone] flavoprotein 2, mitochondrial	0.00097	-0.1	-0.1	0.1	0.1		0.34	0.0039	0.13	0.0039	0.0082	0.26
NADH dehydrogenase [ubiquinone] iron-sulfur protein 2, mitochondrial	0.0001	-0.1	0	0.1	0		0.009	0.009	0.05	0.047	0.25	0.028
NADH dehydrogenase [ubiquinone] iron-sulfur protein 3, mitochondrial	0.0001	0	0	0.4	0.2		0.11	0.0017	0.05	0.0017	0.0017	0.0017
NADH-ubiquinone oxidoreductase 75 kDa subunit, mitochondrial	0.0001	-0.1	-0.1	0.1	0		0.12	< 0.0001	0.009	< 0.0001	< 0.0001	0.00013
Neural cell adhesion molecule L1	0.006	-0.1	-0.2	0	-0.1		0.39	0.021	0.44	0.021	0.77	0.021
Neutral alpha-glucosidase AB	0.002	0	0.1	0.2	0		0.019	0.0052	0.85	0.94	0.0041	0.00051
Nexilin	0.001	0	-0.2	-0.1	-0.1		0.021	0.021	0.12	0.15	0.043	0.56
Nicastrin	0.001	0	0	0.3	0.2		0.39	0.021	0.35	0.021	0.021	0.25
Nicotinamide phosphoribosyltransferase	0.001	-0.1	0.3	0	0.1		0.05	0.05	0.076	0.05	0.05	0.28
Nidogen-1	0.0043	0	0	-0.1	-0.1		0.16	0.45	0.05	0.98	0.042	0.051
Nidogen-2	0.0001	0.1	-0.2	-0.1	0		< 0.0001	0.00015	0.05	0.0094	0.0024	0.77
Nitric oxide synthase, brain	0.006	0.1	0.1	-0.5	0.1		0.28	0.05	0.11	0.05	0.28	0.05
Nodal modulator 1	0.0001	0	0	0.3	-0.1		0.65	0.0033	0.92	0.004	0.31	0.0033
NSFL1 cofactor p47	0.002	-0.2	0.1	0.1	-0.1		0.0027	0.0017	0.6	0.22	0.015	0.0049
Nucleobindin-1	0.0001	0	0.2	0.3	0.1		< 0.0001	< 0.0001	0.11	< 0.0001	0.0035	< 0.0001
Nucleolin	0.0001	0.2	0.3	0	0.2		< 0.0001	0.0019	0.25	< 0.0001	0.0089	< 0.0001
Omega-amidase NIT2	0.00053	0	0.2	0.2	0.1		0.009	0.009	0.19	0.6	0.009	0.047
Ornithine aminotransferase, mitochondrial	0.00014	0.1	0	0.1	0		0.0019	0.43	0.15	0.0021	0.61	0.0041
Pancreatic alpha-amylase	0.0001	-1.2	-2.1	2.2	-2.2		0.00035	0.00035	0.029	0.00035	0.015	0.00035
Pancreatic triacylglycerol lipase	0.0001	-1.5	-2.5	2.3	-2.5		0.0017	0.0017	0.016	0.0017	0.44	0.0017
PCTP-like protein	0.002	0	0.3	0.1	0.2		0.021	0.021	0.12	0.021	0.25	0.083
PDZ and LIM domain protein 1	0.0043	0.2	0.3	0.3	0.1		0.042	0.031	0.12	0.19	0.0071	0.0031
PDZ and LIM domain protein 3	0.0001	0.1	0	0	-0.4		0.34	0.75	0.12	0.96	0.00094	0.0016
PDZ and LIM domain protein 7	0.0001	0.3	-0.1	-0.3	0		0.00049	0.00067	0.51	0.07	0.038	0.058
PDZ domain-containing protein GIPC2	0.00078	0.5	0.4	0.2	0.3		0.05	0.05	0.24	0.05	0.05	0.83
Peptidyl-prolyl cis-trans isomerase B	0.0001	0.1	0.1	0.4	-0.1		0.25	0.009	0.05	0.009	0.009	0.009
Perilipin-1	0.0001	-0.5	-0.8	0.2	0.9		0.05	0.05	0.15	0.05	0.05	0.05
Perilipin-4	0.0001	-0.1	-0.4	-0.3	0		< 0.0001	0.024	0.081	0.0044	< 0.0001	0.0015
Periostin	0.0001	0	0.1	-0.3	0		< 0.0001	< 0.0001	0.021	< 0.0001	< 0.0001	< 0.0001
Peripherin	0.0001	0.1	-0.2	-0.2	-0.1		< 0.0001	0.0003	0.12	0.63	0.015	0.82
Peroxiredoxin-5, mitochondrial	0.0001	0.1	0.1	0.2	0.3		0.078	0.016	0.05	0.055	0.0039	0.016
Peroxiredoxin-6	0.0001	-0.3	0	0.5	0.3		0.00021	0.00016	0.12	0.00016	0.00016	0.00021
Phenylalanine--tRNA ligase beta subunit	0.0056	-0.1	0.1	-0.1	0.1		0.0065	0.38	0.12	0.0039	0.34	0.078
Phosducin-like protein 3	0.001	0.1	0	-0.3	-0.1		0.28	0.05	0.12	0.05	0.05	0.05
Phosphatidylethanolamine-binding protein 1	0.0059	-0.1	0.1	0.2	0.1		0.009	0.009	0.83	0.6	0.6	0.46
Phosphatidylinositol-binding clathrin assembly protein	0.0001	0	0	-0.2	-0.1		0.85	0.0027	0.12	0.0033	0.064	0.004
Phosphoacetylglucosamine mutase	0.002	-0.1	0.4	0.2	0		0.021	0.021	< 0.0001	0.083	0.021	0.021
Phosphoenolpyruvate carboxykinase [GTP], mitochondrial	0.0023	-0.1	0.1	0.2	0.1		0.0039	0.0039	0.44	0.42	0.52	0.23
Phosphoglucomutase-1	0.0001	-0.2	0.1	0	0		< 0.0001	< 0.0001	0.05	0.0004	< 0.0001	0.36
Phosphoglucomutase-2	0.0001	-0.2	0.2	0.2	0.2		0.00035	0.00035	0.05	0.96	0.96	0.69
Phosphoglucomutase-like protein 5	0.0001	0.3	-0.2	-0.3	-0.1		< 0.0001	< 0.0001	0.47	< 0.0001	< 0.0001	< 0.0001
Phosphoglycerate kinase 1	0.00011	-0.1	0	0.1	0.1		0.00021	0.00051	0.05	0.6	0.29	0.82
Phospholipase B-like 1	0.004	-0.1	-0.3	0.2	0.2		0.05	0.05	0.083	0.05	0.05	0.51
Phosphomannomutase 2	0.0001	0.1	0.3	0.3	0.2		0.009	0.009	0.51	0.12	0.009	0.076
Plasmalemma vesicle-associated protein	0.0001	0.4	-0.2	0.2	-0.3		0.009	0.009	0.56	0.009	0.3	0.009
Plasminogen activator inhibitor 1 RNA-binding protein	0.003	0.1	0.3	-0.3	0.3		0.19	0.05	0.12	0.05	0.83	0.05
Plastin-1	0.0001	0.5	0.1	0.2	0.1		0.00078	0.00078	0.51	0.0028	0.27	0.0087
Plastin-2	0.0001	-0.1	-0.4	0.1	0.4		0.0003	0.00027	0.39	< 0.0001	< 0.0001	< 0.0001
Platelet glycoprotein 4	0.00015	0	-0.3	0.3	0.9		0.021	0.021	0.21	0.021	0.021	0.021
Plectin	0.0001	0	-0.1	-0.2	-0.1		0.48	< 0.0001	0.05	< 0.0001	< 0.0001	< 0.0001
Polymerase I and transcript release factor	0.0001	0	-0.1	-0.3	0		0.0028	< 0.0001	0.12	0.011	0.00091	< 0.0001
Polymeric immunoglobulin receptor	0.0001	-0.1	0.2	0.3	0		0.00029	0.00021	0.05	0.0065	0.0046	0.0012
Potassium-transporting ATPase alpha chain 2	0.0001	-0.9	-0.6	1	0.3		0.05	0.05	0.14	0.05	0.05	0.05
Prelamin-A/C	0.0001	0	-0.1	0	-0.1		< 0.0001	0.0028	0.19	< 0.0001	0.13	< 0.0001
Probable ATP-dependent RNA helicase DDX5	0.001	0.3	0.2	0	0.3		0.041	0.03	0.009	0.055	0.035	0.055
Programmed cell death protein 4	0.0001	-0.2	0.1	0	0.1		0.0039	0.0039	0.12	0.01	0.34	0.037
Prohibitin	0.0001	-0.1	0.1	0.2	0.1		0.00022	< 0.0001	0.009	0.065	0.065	0.36
Prohibitin-2	0.0001	-0.2	0	0.1	0.1		0.0017	0.0017	0.83	0.025	0.57	0.22
Prolargin	0.0001	0.1	-0.2	-0.2	0		0.0011	0.00093	0.021	0.33	0.0023	0.0054
Proliferation-associated protein 2G4	0.00091	0	0.1	0.1	0.1		0.00044	0.00027	0.009	0.34	0.02	0.00091
Prolow-density lipoprotein receptor-related protein 1	0.0001	0	-0.2	0	-0.1		< 0.0001	0.95	0.021	0.00011	0.00011	0.16
Prolyl 4-hydroxylase subunit alpha-1	0.0015	0.1	-0.3	-0.1	0		0.05	0.05	0.047	0.05	0.05	0.05
Prolyl endopeptidase	0.0001	0	0.2	-0.2	0.1		0.00078	0.093	0.25	0.00078	0.018	0.0023
Propionyl-CoA carboxylase alpha chain, mitochondrial	0.0001	-0.1	0	0.2	0.1		0.21	0.00021	0.12	0.00025	0.026	0.0019
ProSAAS	0.0001	-0.3	-0.2	0	0		0.021	0.021	0.12	0.021	0.021	0.15
Prostaglandin G/H synthase 1	0.001	0.1	-0.2	-0.4	-0.3		0.021	0.021	0.89	0.11	0.083	0.47
Prostaglandin reductase 2	0.001	-0.1	0.2	0.2	0.3		0.021	0.021	0.12	1	0.25	0.77
Proteasome activator complex subunit 1	0.0001	0	0	0.1	0.3		0.046	0.0019	0.12	0.052	0.00078	0.0023
Proteasome subunit alpha type-5	0.002	0	0	0.1	0.1		0.016	0.0033	0.05	0.29	0.021	0.6
Proteasome subunit beta type-8	0.001	-0.1	-0.2	0.3	0.2		0.28	0.05	0.12	0.05	0.05	0.51
Proteasome-associated protein ECM29 homolog	0.001	0.3	0.1	-0.2	0.2		0.15	0.03	0.009	0.03	0.25	0.03
Protein Ahnak	0.0001	0.1	-0.1	-0.1	0		< 0.0001	< 0.0001	0.12	< 0.0001	0.00011	< 0.0001
Protein arginine N-methyltransferase 1	0.0052	0	0	-0.1	0.1		0.35	0.3	0.12	0.022	0.12	0.076
Protein Atp2b4	0.0001	0.2	-0.2	-0.3	-0.1		0.00035	0.00035	0.12	0.015	0.27	0.00067
Protein canopy homolog 2	0.00016	-0.1	0	0.3	0		0.028	0.009	0.041	0.009	0.076	0.009
Protein Col6a3	0.0001	0	0.6	-0.2	-0.2		< 0.0001	< 0.0001	0.12	< 0.0001	< 0.0001	0.49
Protein disulfide-isomerase	0.0001	0.1	0.1	0.7	0		0.14	< 0.0001	0.12	< 0.0001	0.0013	< 0.0001
Protein disulfide-isomerase A2	0.0001	-1.3	-2	2.2	-2.1		0.0017	0.0017	0.12	0.0017	0.035	0.0017
Protein disulfide-isomerase A3	0.0016	0.2	0.2	0.2	0.1		0.75	0.12	0.12	0.35	0.0068	0.0025
Protein disulfide-isomerase A4	0.0001	0	0	0.1	0.1		0.14	0.0091	0.12	0.0022	0.00029	0.79
Protein disulfide-isomerase A6	0.0001	0	-0.1	0.4	0		0.012	0.00078	0.25	0.00078	0.53	0.00078
Protein enabled homolog	0.001	0	-0.1	-0.3	-0.2		0.041	0.046	0.12	0.012	0.021	0.34
Protein FAM49B	0.005	-0.1	-0.2	-0.2	0.2		0.05	1	0.83	0.19	0.05	0.05
Protein Fcgbp	0.0001	-0.3	-0.4	0.7	0.4		0.0045	< 0.0001	1	< 0.0001	< 0.0001	0.00027
Protein flightless-1 homolog	0.0039	0	-0.1	-0.3	0.1		0.12	0.009	0.25	0.009	0.047	0.009
Protein ITFG3	0.0001	-0.1	-0.1	0.4	0.2		0.17	0.0039	0.44	0.0039	0.0051	0.016
Protein kinase C alpha type	0.001	0.2	0	-0.3	0.2		0.13	0.05	0.05	0.05	0.13	0.05
Protein MRVI1	0.001	0.3	-0.2	-0.2	-0.1		0.021	0.021	0.25	0.77	0.021	0.15
Protein Numa1	0.0038	-0.1	-0.1	-0.1	0.1		0.15	0.89	0.44	0.45	0.0013	0.038
Protein phosphatase 1 regulatory subunit 12A	0.0001	0.1	-0.2	-0.3	-0.2		< 0.0001	< 0.0001	0.05	0.002	0.98	0.0075
Protein phosphatase 1 regulatory subunit 12C	0.0001	0	-0.1	-0.3	-0.3		0.001	< 0.0001	0.39	< 0.0001	0.0011	0.035
Protein PRRC1	0.00019	0	0.2	0.2	0		0.0051	0.0065	0.51	0.3	0.0082	0.01
Protein Qars	0.00017	0	0	-0.2	0		0.13	0.011	0.7	0.006	0.48	0.004
Protein Rap1gds1	0.00021	-0.1	0.1	-0.1	0		0.00029	0.24	0.12	0.00038	0.0025	0.07
Protein Tns1	0.0001	0.1	-0.2	-0.3	0		< 0.0001	< 0.0001	0.12	0.019	< 0.0001	< 0.0001
Protein Tnxb	0.0001	-0.1	0	0.1	-0.2		< 0.0001	< 0.0001	0.44	< 0.0001	< 0.0001	< 0.0001
Protein transport protein Sec31A	0.004	0.2	0.2	0.2	0		0.35	0.17	0.12	0.46	0.009	0.028
Protein unc-45 homolog A	0.0001	0.3	-0.1	-0.3	0		0.016	0.009	0.12	0.009	0.4	0.009
Protein Utrn	0.0027	0	0	-0.2	0		0.25	0.0018	0.12	0.013	0.59	0.0083
Protein-glutamine gamma-glutamyltransferase 2	0.0001	0.1	0	-0.1	-0.1		0.55	0.00011	0.12	< 0.0001	< 0.0001	0.42
Protein-glutamine gamma-glutamyltransferase E	0.0001	-0.3	-0.4	0.7	0.3		0.17	< 0.0001	1	< 0.0001	< 0.0001	< 0.0001
Prothrombin	0.006	0.1	-0.1	-0.2	-0.1		0.081	0.05	0.12	0.05	0.51	0.19
Prothymosin alpha	0.00066	0.1	0	-0.2	0.2		0.05	0.05	0.12	0.05	0.05	0.05
Purine nucleoside phosphorylase	0.0001	0	0	0.3	0.3		0.34	0.0016	0.05	0.0033	0.00078	0.71
Puromycin-sensitive aminopeptidase	0.00028	0.1	0.1	-0.1	0.1		0.0039	0.094	0.13	0.00091	0.15	0.028
Putative pre-mRNA-splicing factor ATP-dependent RNA helicase DHX15	0.00027	0.1	0.2	-0.5	0.3		0.043	0.021	0.85	0.021	0.021	0.021
Putative RNA-binding protein Luc7-like 2	0.003	0	0.1	-0.1	0.1		0.15	0.56	0.05	0.021	0.25	0.021
Pyrethroid hydrolase Ces2e	0.001	0.2	-0.1	0.3	-0.1		0.05	0.05	0.047	0.05	0.05	0.05
Pyridoxal-dependent decarboxylase domain-containing protein 1	0.0001	-0.1	0.6	0.2	-0.1		0.00078	0.0023	0.15	0.0011	0.00078	0.0016
Pyruvate carboxylase, mitochondrial	0.0001	-0.1	-0.4	0.4	0.4		0.0011	0.00041	0.12	0.00041	0.00041	0.57
Pyruvate kinase PKM	0.0001	0	0.1	-0.1	0.1		< 0.0001	0.24	0.009	< 0.0001	0.98	0.00023
Ras GTPase-activating-like protein IQGAP1	0.0001	0.1	-0.1	-0.1	0.2		< 0.0001	< 0.0001	0.15	0.06	< 0.0001	< 0.0001
Ras suppressor protein 1	0.0001	0	-0.2	-0.3	0		0.004	0.0017	0.12	0.004	0.0017	0.0017
Ras-related protein Rab-14	0.0001	0	0	0.2	0.2		0.64	0.00078	0.28	0.00078	0.0014	0.46
Ras-related protein Rab-2A	0.002	0.1	0	0.2	0.1		0.64	0.0016	0.05	0.0016	0.021	0.024
Ras-related protein Rab-3D	0.003	-0.1	0	0.3	0		0.05	0.05	0.25	0.05	0.66	0.05
Redox-regulatory protein FAM213A	0.002	0	-0.3	-0.4	0.3		0.05	0.05	0.009	0.28	0.05	0.05
Retinoid-inducible serine carboxypeptidase	0.002	0	0.1	0	0.3		0.03	0.15	0.021	0.67	0.083	0.021
Rho GTPase-activating protein 1	0.004	0	0.1	-0.1	-0.1		0.13	0.51	0.13	0.05	0.05	0.13
Rho-associated protein kinase 1	0.003	0.2	0	-0.2	0.2		0.05	0.05	0.13	0.05	0.081	0.05
RuvB-like 2	0.0001	0	-0.1	0.1	0.1		0.4	0.07	0.12	0.0031	0.00067	0.76
S-adenosylmethionine synthase isoform type-2	0.001	-0.1	0.1	0.2	0.1		0.05	0.05	1	0.13	0.51	0.05
Sarcolemmal membrane-associated protein	0.0001	0	-0.2	-0.3	-0.2		< 0.0001	< 0.0001	0.32	0.023	0.75	0.081
Sarcoplasmic/endoplasmic reticulum calcium ATPase 2	0.0001	0.2	-0.1	-0.2	-0.1		< 0.0001	< 0.0001	0.0012	0.035	0.12	0.06
Sarcoplasmic/endoplasmic reticulum calcium ATPase 3	0.0001	0	0.2	-0.1	0.2		0.00078	0.074	0.1	0.00078	0.37	0.00078
Secernin-2	0.001	-0.1	-0.1	0.4	0		0.11	0.021	0.12	0.021	0.39	0.021
Secretogranin-1	0.002	-0.3	0.5	-0.1	-0.2		0.05	0.13	0.44	0.05	0.05	0.05
Selenium-binding protein 1	0.0001	-0.1	-0.1	0.5	0.3		0.013	< 0.0001	0.12	< 0.0001	< 0.0001	< 0.0001
Seminal vesicle secretory protein 5	0.00063	-1.6	0.2	1	-1		0.05	0.05	0.44	0.05	0.05	0.05
Sepiapterin reductase	0.0001	-0.2	0.1	0	0		0.0016	0.0023	0.12	0.059	0.1	0.92
Septin-9	0.00041	0.1	-0.1	0	-0.1		0.0041	0.093	1	0.51	0.31	0.63
Serine (Or cysteine) peptidase inhibitor, clade A, member 3N, isoform CRA_a	0.0001	-0.1	0.7	-0.8	-0.6		0.021	0.25	1	0.021	0.021	0.47
Serine/arginine-rich splicing factor 1	0.00084	0	-0.1	0.1	0.2		0.31	0.012	0.081	0.019	0.00093	0.83
Serine--tRNA ligase, cytoplasmic	0.003	0	0.1	0.2	0		0.009	0.009	0.12	0.17	0.016	0.009
Serpin B5	0.0001	0	0.3	0.2	0.3		0.00067	0.0023	0.081	0.012	0.077	0.0011
Serpin B6	0.0045	0	0.3	0.1	0.2		0.00078	0.0023	0.51	0.0054	0.0063	0.14
Serpin H1	0.0001	0.2	-0.2	-0.4	0		0.00016	0.00016	0.12	0.0022	0.00067	0.00016
Serrate RNA effector molecule homolog	0.00049	0	0.1	0	0.2		0.0051	0.87	0.66	0.0065	0.34	0.0065
Serum deprivation-response protein	0.00014	0	-0.1	-0.3	0		0.082	0.00067	0.12	0.07	0.041	0.00088
Short-chain specific acyl-CoA dehydrogenase, mitochondrial	0.0001	-0.2	0.1	0.3	0.1		0.0017	0.0017	0.00012	0.0017	0.85	0.0017
Sial peptidase complex subunit 3	0.005	-0.1	-0.1	0.4	0		0.51	0.05	1	0.05	0.05	0.05
Small nuclear ribonucleoprotein Sm D2	0.001	0.3	0.2	-0.1	0.3		0.05	0.05	0.081	0.05	0.19	0.05
Smoothelin	0.0001	0.2	-0.2	-0.3	-0.2		< 0.0001	< 0.0001	0.05	0.00091	0.081	0.0032
Solute carrier family 12 member 2	0.0001	0	0.3	0	0.1		0.0017	0.28	1	0.0017	0.0017	0.048
Sorbin and SH3 domain-containing protein 1	0.0001	0	-0.2	-0.3	-0.1		< 0.0001	< 0.0001	0.83	0.023	0.00013	0.00063
Sorbin and SH3 domain-containing protein 2	0.0001	0.2	-0.1	-0.1	0		0.00016	0.00067	0.19	0.12	0.0073	0.23
Sorbitol dehydrogenase	0.0001	-0.1	-0.1	0.4	0.1		0.23	0.0039	0.0017	0.0039	0.0065	0.037
Spectrin beta chain, non-erythrocytic 1	0.0001	0	0	-0.2	0		0.12	< 0.0001	0.83	< 0.0001	0.47	< 0.0001
Splicing factor 3B subunit 3	0.00071	0.1	0.2	-0.1	0.1		0.076	0.028	0.12	0.009	0.4	0.028
Splicing factor, proline- and glutamine-rich	0.0009	0.3	0.1	0.1	0.3		0.013	0.013	0.12	0.61	0.0049	0.025
Staphylococcal nuclease domain-containing protein 1	0.0001	0.2	-0.1	0.4	0		0.00035	0.015	1	0.0031	0.4	0.0017
Stress-70 protein, mitochondrial	0.0001	0	0	0.1	0.1		0.00025	< 0.0001	0.94	0.017	0.0024	0.8
Stress-induced-phosphoprotein 1	0.004	0.1	0	0	0		0.077	0.011	0.12	0.048	0.46	0.4
Succinate dehydrogenase [ubiquinone] flavoprotein subunit, mitochondrial	0.0058	-0.1	0	0.1	0.1		0.00038	0.00088	0.05	0.23	0.65	0.29
Succinyl-CoA ligase [ADP-forming] subunit beta, mitochondrial	0.004	0.1	0	0	0.1		0.021	0.0067	0.12	0.39	0.021	0.15
Succinyl-CoA ligase [GDP-forming] subunit beta, mitochondrial	0.0001	0	0.1	0.3	0.3		< 0.0001	< 0.0001	1	0.0061	0.0052	0.069
Sulfated glycoprotein 1	0.0026	-0.2	0	0	0		0.0017	0.0017	0.12	0.75	0.22	0.28
Sulfide:quinone oxidoreductase, mitochondrial	0.001	0	0.2	0	0.1		0.00067	0.031	0.05	0.0017	0.015	0.76
Sulfotransferase 1 family member D1	0.002	-0.1	0.4	0.2	0		0.05	0.05	0.83	0.05	0.05	0.05
Sulfotransferase family cytosolic 1B member 1	0.00074	-0.1	0.1	0.3	0.1		0.05	0.05	0.12	0.05	0.05	0.05
Superoxide dismutase [Cu-Zn]	0.005	-0.3	0	0.1	0		0.016	0.016	0.05	0.35	0.75	0.25
Superoxide dismutase [Mn], mitochondrial	0.00014	-0.1	-0.1	0.1	0		0.047	0.009	0.05	0.009	0.047	0.047
Supervillin	0.0001	0.1	-0.3	-0.5	-0.2		0.00011	< 0.0001	0.12	< 0.0001	0.41	0.0003
Suppressor of tumorigenicity 14 protein homolog	0.001	-0.1	0.1	0.2	0.2		0.081	0.05	0.51	0.05	0.38	0.51
Sushi domain-containing protein 2	0.00021	0.1	-0.2	-0.2	0		0.0039	0.01	1	0.52	0.055	0.2
SWI/SNF-related matrix-associated actin-dependent regulator of chromatin subfamily E member 1	0.001	-0.2	-0.1	0.1	0		0.05	0.05	0.12	0.05	0.51	0.05
Synaptopodin-2	0.0001	0.2	-0.3	-0.3	-0.2		< 0.0001	< 0.0001	0.25	0.054	0.43	0.49
Synemin	0.0001	0.1	-0.3	-0.5	-0.4		< 0.0001	< 0.0001	1	< 0.0001	< 0.0001	0.00025
Talin-1	0.0001	0.1	-0.2	-0.3	-0.1		< 0.0001	< 0.0001	0.12	< 0.0001	0.006	< 0.0001
Tax_Id	0.0001	-0.4	0.2	0.4	0		< 0.0001	< 0.0001	0.95	0.00019	< 0.0001	< 0.0001
Tax_Id	0.0001	-0.3	0.3	0.4	-0.2		0.00078	0.00078	0.92	0.83	0.00078	0.00078
Tax_Id	0.0001	-0.2	0.3	0.4	0.2		< 0.0001	< 0.0001	0.016	0.15	0.00012	0.00091
Tax_Id	0.0001	-1.5	-1.6	-2.4	-1.9		0.0066	< 0.0001	0.021	< 0.0001	< 0.0001	< 0.0001
Tax_Id	0.0001	-0.4	0.1	-0.7	0.1		< 0.0001	0.0056	0.05	0.00014	0.47	< 0.0001
Tax_Id	0.0001	-1.9	-2.4	-3	-3.2		< 0.0001	< 0.0001	0.05	< 0.0001	< 0.0001	0.00044
T-complex protein 1 subunit alpha	0.0001	0.2	0	0.1	0		< 0.0001	0.015	0.12	0.67	0.13	0.044
T-complex protein 1 subunit beta	0.0001	0.1	0	0	0		0.00011	0.0096	0.12	0.22	0.23	0.31
T-complex protein 1 subunit delta	0.0001	0.1	0	-0.1	-0.2		0.16	0.0019	0.12	0.0044	< 0.0001	0.00094
T-complex protein 1 subunit epsilon	0.00017	0.2	-0.1	0.1	0		< 0.0001	0.68	1	0.0032	0.054	0.061
T-complex protein 1 subunit eta	0.00011	0.1	0	0	-0.1		0.002	0.14	0.12	0.9	0.0095	0.014
T-complex protein 1 subunit gamma	0.0033	0	0	-0.1	0		0.82	0.002	0.44	0.00024	0.0035	0.11
T-complex protein 1 subunit theta	0.0001	0.2	-0.1	-0.1	0		< 0.0001	< 0.0001	0.12	0.72	0.0009	0.012
T-complex protein 1 subunit zeta	0.0001	0.2	0	0	0		0.00051	0.0019	1	0.71	0.13	0.049
Tenascin	0.0001	-0.1	0	-0.1	-0.3		< 0.0001	0.058	0.12	0.0045	< 0.0001	< 0.0001
Testin	0.0001	0.5	-0.2	-0.1	0.3		0.009	0.009	0.44	0.6	0.009	0.009
Thiosulfate sulfurtransferase	0.0001	-0.3	0.1	0.4	0.1		0.0017	0.0017	0.44	0.0017	0.34	0.0017
Threonine--tRNA ligase, cytoplasmic	0.0035	0.3	0.3	-0.1	0.2		1	0.043	0.44	0.043	0.25	0.083
Tight junction protein ZO-2	0.0001	0	0.1	0.3	0		0.047	0.00035	0.32	0.0031	0.012	0.00093
Tissue alpha-L-fucosidase	0.004	-0.3	0.2	0.2	0.2		0.043	0.043	0.12	0.56	0.56	0.77
Trans-2-enoyl-CoA reductase, mitochondrial	0.0001	0	-0.2	0.2	0.1		0.012	0.009	0.12	0.009	0.016	0.17
Transaldolase	0.00015	0	0.1	0.2	0.2		0.01	0.0039	1	0.11	0.2	0.2
Transforming growth factor beta-1-induced transcript 1 protein	0.0001	0.1	-0.1	-0.4	-0.1		0.028	0.009	0.12	0.009	0.009	0.009
Transforming growth factor-beta-induced protein ig-h3	0.0001	0.2	-0.1	-0.5	-0.1		0.00016	< 0.0001	0.82	0.00027	0.28	< 0.0001
Transgelin	0.0001	-0.1	0	-0.5	-0.2		0.00034	< 0.0001	0.12	< 0.0001	< 0.0001	< 0.0001
Translin-associated protein X	0.003	-0.2	0	0.5	0.2		0.05	0.05	0.44	0.05	0.28	0.05
Transmembrane 9 superfamily member 4	0.003	0	0.2	0.3	0.3		0.05	0.05	0.44	0.05	0.28	0.05
Transmembrane emp24 domain-containing protein 10	0.002	0	0	0.2	0		0.021	0.021	0.12	0.021	0.56	0.021
Transmembrane emp24 domain-containing protein 2	0.0053	-0.2	-0.2	0.1	0		0.83	0.05	0.12	0.05	0.28	0.05
Trifunctional enzyme subunit alpha, mitochondrial	0.0001	0.1	0	-0.1	0.2		0.001	0.00016	0.00021	0.24	< 0.0001	< 0.0001
Trifunctional enzyme subunit beta, mitochondrial	0.0001	0.1	0.1	0	0.3		0.79	0.093	0.16	0.059	0.00078	0.0011
Triosephosphate isomerase	0.00085	-0.1	0.1	0	0.1		0.00038	0.0073	0.12	0.11	0.79	0.2
tRNA-splicing ligase RtcB homolog	0.0017	0	0.2	-0.1	0.1		0.00093	0.48	0.44	0.00093	0.047	0.012
Tropomyosin alpha-4 chain	0.00097	0.1	-0.2	-0.1	0		0.00094	0.00094	1	0.92	0.016	0.29
Tropomyosin beta chain	0.0001	-0.1	-0.2	-0.4	-0.3		0.0046	0.0011	0.12	0.0016	0.018	0.1
Trypsin - Sus scrofa (Pig).	0.0001	-0.3	-0.3	-0.7	0.2		0.025	0.0017	0.56	0.0017	0.0017	0.0017
Tryptophan--tRNA ligase, cytoplasmic	0.0041	0.1	0.2	0.1	0.1		0.00067	0.17	0.44	0.0012	0.0012	0.85
Twinfilin-1	0.00094	0.1	-0.1	-0.3	-0.1		0.03	0.03	0.7	0.47	0.47	0.31
Tyrosine-protein phosphatase non-receptor type 11	0.0001	0.1	-0.1	-0.5	-0.2		0.012	0.009	0.12	0.009	0.3	0.009
Tyrosine--tRNA ligase, cytoplasmic	0.0001	0	0	0.2	-0.2		0.11	0.00016	0.12	0.0025	0.0032	0.00021
Ubiquitin-like modifier-activating enzyme 1	0.0001	0	0.2	0.1	0.1		< 0.0001	0.0045	0.25	< 0.0001	< 0.0001	0.62
UDP-glucose 4-epimerase	0.0001	-0.1	0.3	0.1	0.2		0.0039	0.0039	0.009	0.0039	0.0039	0.87
UDP-glucose 6-dehydrogenase	0.0001	-0.1	0	0.6	0		0.00051	0.00016	0.44	0.00016	0.21	0.00016
UDP-glucuronosyltransferase 1-7C	0.004	0.1	0.4	0.2	0.1		0.022	0.35	0.25	0.047	0.016	0.46
UMP-CMP kinase	0.002	-0.1	0.3	0.1	0.2		0.0039	0.0065	0.44	0.0039	0.0039	0.34
Unconventional myosin-Ia	0.0001	0	0.3	0.2	0.3		< 0.0001	0.0002	0.19	0.0012	0.42	0.028
Unconventional myosin-Ic	0.0001	0.3	-0.1	-0.3	0.1		< 0.0001	< 0.0001	1	0.00036	< 0.0001	< 0.0001
Unconventional myosin-Id	0.003	0.1	0.3	0	0.2		0.021	0.15	0.021	0.021	0.083	0.043
Unconventional myosin-VI	0.0001	0	0.1	-0.1	0.2		0.027	0.015	0.25	0.0017	0.042	0.00093
UPF0568 protein C14orf166 homolog	0.001	0	0	0.2	-0.1		0.56	0.043	0.0092	0.021	0.56	0.043
Uridine 5'-monophosphate synthase	0.004	0.2	0.2	0.2	0		0.095	0.46	0.12	0.75	0.028	0.009
UTP--glucose-1-phosphate uridylyltransferase	0.00037	0.1	0	-0.1	0		0.18	0.0025	0.12	0.0058	0.0064	0.39
Valacyclovir hydrolase	0.002	-0.2	-0.2	0	0		0.28	0.05	< 0.0001	0.05	0.05	0.05
Valine--tRNA ligase	0.001	0	0	-0.2	0		0.41	0.11	1	0.013	0.48	0.013
Vasodilator-stimulated phosphoprotein	0.0001	0	-0.1	0.3	0.1		0.055	0.0039	0.12	0.0039	0.0065	0.025
Very long-chain specific acyl-CoA dehydrogenase, mitochondrial	0.0001	-0.1	0.2	0.1	0.1		< 0.0001	< 0.0001	0.048	0.27	0.00053	0.23
Vesicular integral-membrane protein VIP36	0.0034	0.1	0.1	0.4	0.2		0.68	0.009	0.14	0.016	0.17	0.25
Vigilin	0.005	0.1	0	0.1	0		0.83	0.14	0.44	0.29	0.046	0.0046
Villin-1	0.0001	0	0.1	0.4	0.1		0.00083	< 0.0001	1	< 0.0001	0.17	< 0.0001
Vimentin	0.0001	0.1	-0.2	-0.1	-0.1		< 0.0001	0.0028	0.12	0.013	0.0022	0.26
Vinculin	0.0001	-0.1	-0.2	-0.3	-0.2		< 0.0001	< 0.0001	0.7	< 0.0001	0.00021	0.1
Vitamin D-binding protein	0.00085	0	0.1	-0.2	0		0.043	0.043	0.12	0.021	0.021	0.021
Voltage-dependent anion-selective channel protein 1	0.0001	0.2	0.1	0.3	0.3		0.12	0.017	0.12	0.02	0.00013	0.52
Voltage-dependent anion-selective channel protein 2	0.00069	-0.1	0.1	0.1	0.3		0.009	0.009	0.12	0.6	0.009	0.25
Voltage-dependent anion-selective channel protein 3	0.0001	0.1	0.2	0.4	0.4		0.65	0.0017	0.7	0.006	0.0017	0.95
Voltage-dependent calcium channel subunit alpha-2/delta-1	0.0011	0	-0.2	-0.2	-0.1		< 0.0001	0.046	0.00035	0.61	0.0054	0.16
von Willebrand factor A domain-containing protein 5A	0.0028	0.1	0.1	0	0.2		0.00072	0.77	1	0.036	0.022	0.01
V-type proton ATPase subunit B, brain isoform	0.0004	0	-0.1	0.1	0.1		0.79	0.0014	0.12	0.0064	0.014	0.094
Xaa-Pro dipeptidase	0.001	0.2	0.1	0.2	0		0.05	0.51	0.021	0.28	0.05	0.05
Xanthine dehydrogenase/oxidase	0.00038	0.5	0.4	-0.1	0.4		0.095	0.009	0.32	0.009	0.46	0.009
Zinc-binding alcohol dehydrogenase domain-containing protein 2	0.0028	0.1	0.2	0.4	0		0.076	0.028	0.7	0.12	0.028	0.009
Zymogen granule membrane protein 16	0.0001	-0.4	0.1	0.4	0.5		0.05	0.05	1	0.05	0.05	0.13

## Sheet: Table S4
Table S5. All host mucosal proteins identified by 4 or more peptides
		fold change from 'total protein'					Benjamini-Hochberg corrected P values
Protein Name	P value	Low fat	Milk fat	Olive oil	Corn oil		Lowfat~Milk	Lowfat~Olive	Lowfat~Corn	Milk ~ Olive	Corn~Milk	Corn~Olive
2,4-dienoyl-CoA reductase, mitochondrial	0.002	0.3	0	-0.1	0.4		0.066	0.055	0.2	0.34	0.0039	0.0039
26S protease regulatory subunit 6A	0.0049	-0.8	0	0	0.3		0.27	0.2	0.047	0.76	0.00049	0.00035
26S proteasome non-ATPase regulatory subunit 1	0.0012	-0.6	0	-0.1	0.1		0.0092	0.0036	0.0036	0.077	0.077	0.042
26S proteasome non-ATPase regulatory subunit 3	0.001	0.5	0	-0.3	-0.1		0.064	0.004	0.041	0.0017	0.035	0.004
3 beta-hydroxysteroid dehydrogenase/Delta 5-->4-isomerase type 3	0.001	0.2	-0.1	0.1	-0.6		0.05	0.83	0.05	0.05	0.05	0.05
3'(2'),5'-bisphosphate nucleotidase 1	0.002	0.1	-0.4	-0.3	-0.1		0.006	0.035	0.14	0.13	0.0027	0.025
3-alpha-hydroxysteroid dehydrogenase type 1	0.0016	-0.3	0.2	-0.1	0		0.006	0.064	0.035	0.0033	0.006	0.0073
3-mercaptopyruvate sulfurtransferase	0.0001	-0.9	0.1	0.3	0		0.009	0.009	0.009	0.047	0.076	0.009
40S ribosomal protein S10	0.0021	-0.8	0.3	0.1	0		0.05	0.05	0.05	0.05	0.05	0.83
40S ribosomal protein S2	0.0001	0.8	0.5	0.1	0.3		0.041	0.0017	0.0017	0.0017	0.0017	0.0017
40S ribosomal protein S28 (Fragment)	0.003	0.4	-0.4	-0.3	-0.2		0.05	0.05	0.05	0.05	0.05	0.51
40S ribosomal protein S9	0.0001	1.5	0.6	-0.1	-0.4		0.05	0.05	0.05	0.05	0.05	0.05
60S ribosomal protein L5	0.002	0.4	0.2	-0.2	-0.3		0.2	0.025	0.025	0.025	0.055	0.34
6-phosphogluconate dehydrogenase, decarboxylating	0.0001	0.5	0.2	-0.1	0.2		0.082	0.0028	0.11	0.0014	0.34	0.0028
6-phosphogluconolactonase	0.00091	-0.8	0	0.1	0.3		0.01	0.0065	0.0065	0.52	0.037	0.34
Acetyl-coenzyme A synthetase 2-like, mitochondrial	0.00099	0.3	0	-0.1	-0.2		0.061	0.021	0.021	0.03	0.021	0.083
Aconitate hydratase, mitochondrial	0.0001	-0.3	0.4	0.2	0.2		0.0001	0.0001	0.0001	0.0001	0.0001	0.67
Actin-related protein 2/3 complex subunit 5	0.0006	-0.4	0.2	0	0.4		0.05	0.05	0.05	0.05	0.05	0.05
Activated RNA polymerase II transcriptional coactivator p15	0.0001	0.6	-0.3	-0.3	0		0.021	0.021	0.021	0.39	0.021	0.021
Acyl-CoA dehydrogenase family member 10	0.004	0.3	0	-0.2	-0.1		0.061	0.021	0.043	0.021	0.39	0.061
Acyl-CoA synthetase family member 2, mitochondrial	0.003	0.1	-0.3	0	-0.4		0.018	0.22	0.035	0.0027	0.41	0.004
Adenylosuccinate synthetase isozyme 2	0.0027	0.3	-0.1	0	0.1		0.025	0.037	0.15	0.52	0.025	0.2
Adenylyl cyclase-associated protein 1	0.00092	-0.8	0.5	0.1	0.5		0.021	0.021	0.021	0.15	0.77	0.021
Alcohol dehydrogenase 1	0.0034	0	0.6	0	0.6		0.017	0.72	0.053	0.00027	0.32	0.011
Aldehyde dehydrogenase, mitochondrial	0.0001	-0.6	0.2	0	0.6		0.0075	0.024	0.00014	0.0012	0.0001	0.0001
Alpha-1-acid glycoprotein 1	0.001	0.8	0.4	-0.8	-0.6		0.05	0.05	0.05	0.05	0.05	0.05
Alpha-actinin-1	0.0001	0.3	0.1	0.1	-0.3		0.032	0.2	0.0001	0.034	0.0001	0.0001
Alpha-adducin	0.0003	0.5	-0.1	-0.1	-0.2		0.009	0.009	0.009	0.92	0.076	0.12
Alpha-mannosidase 2	0.001	0.6	-0.3	-0.4	-0.2		0.021	0.021	0.021	0.15	0.083	0.021
Alpha-N-acetylgalactosaminidase	0.001	-0.5	0.1	0	0.3		0.05	0.05	0.05	0.28	0.05	0.05
Aminopeptidase N	0.0001	1.8	-1.1	-0.8	-0.8		0.0039	0.0039	0.0039	0.0039	0.0039	0.63
Annexin A13	0.001	1.9	-1.2	-1	-0.9		0.05	0.05	0.05	0.05	0.05	0.28
Annexin A3	0.0001	-0.6	0.1	-0.1	0.6		0.019	0.049	0.00051	0.00016	0.00038	0.00021
Annexin A4	0.0001	0.5	-0.3	-0.3	-0.1		0.00094	0.0018	0.035	0.91	0.00011	0.00094
Anterior gradient protein 2 homolog	0.005	-0.7	-0.1	0	-0.5		0.028	0.028	0.35	0.6	0.009	0.009
AP-1 complex subunit gamma-1	0.001	0.6	-0.1	-0.2	-0.4		0.05	0.05	0.05	0.51	0.05	0.13
Apolipoprotein A-I	0.0001	-0.7	0.2	-0.1	0.5		0.025	0.035	0.006	0.0017	0.0017	0.0017
Apolipoprotein E	0.0001	0.5	-0.1	-0.2	-0.2		0.0017	0.0017	0.0017	0.013	0.22	0.28
Apoptotic chromatin condensation inducer in the nucleus	0.001	0.4	-0.2	0	-0.3		0.05	0.05	0.05	0.05	0.19	0.05
Arginine--tRNA ligase, cytoplasmic	0.00036	0.7	-0.1	-0.2	0		0.0028	0.0011	0.0028	0.6	0.46	0.34
Aspartate aminotransferase, cytoplasmic	0.004	-0.4	0.1	0	0.2		0.11	0.096	0.013	0.76	0.0015	0.0052
ATP synthase F(0) complex subunit B1, mitochondrial	0.001	0.6	-0.1	-0.1	-0.3		0.021	0.021	0.021	0.77	0.043	0.083
ATP synthase subunit O, mitochondrial	0.005	-0.7	0.1	0.1	0.4		0.2	0.34	0.025	0.42	0.0039	0.0039
ATPase Asna1	0.0026	-0.3	0	0	0.2		0.17	0.047	0.016	0.92	0.047	0.009
ATP-binding cassette sub-family D member 3	0.0001	1.1	-0.3	-0.4	-0.5		0.009	0.009	0.009	0.028	0.028	0.06
ATP-dependent (S)-NAD(P)H-hydrate dehydratase	0.0028	-0.5	0.2	0.1	0.2		0.05	0.05	0.05	0.05	0.51	0.05
ATP-dependent RNA helicase A	0.0016	0.6	0.1	-0.1	-0.3		0.12	0.01	0.0082	0.00088	0.00016	0.0041
Beta-1,4 N-acetylgalactosaminyltransferase 2	0.001	0.8	-0.3	0.1	-0.2		0.021	0.021	0.021	0.021	0.021	0.021
Beta-glucuronidase	0.0001	0.6	-0.3	-0.2	0		0.009	0.009	0.009	0.46	0.009	0.009
Beta-hexosaminidase subunit beta	0.0001	0.6	0.2	0	0.4		0.025	0.025	0.14	0.004	0.0017	0.0017
Beta-mannosidase	0.001	0.5	0.3	0.1	0.5		0.05	0.05	0.13	0.05	0.05	0.05
Bifunctional glutamate/proline--tRNA ligase	0.00053	0.8	-0.1	-0.2	0		0.0003	0.00013	0.00053	0.0037	0.11	0.014
C-1-tetrahydrofolate synthase, cytoplasmic	0.0001	0.5	-0.1	-0.1	0		0.013	0.0039	0.038	0.12	0.0022	0.073
Cadherin-17	0.001	-0.1	0	-0.1	0.3		0.79	0.65	0.0093	0.01	0.0001	0.0001
Calcineurin B homologous protein 1	0.0001	0.8	-0.2	-0.2	-0.2		0.009	0.009	0.009	0.028	0.46	0.076
Calcineurin B homologous protein 2	0.00047	0.6	0	-0.3	-0.2		0.021	0.021	0.021	0.15	0.15	0.15
Calcium uniporter protein, mitochondrial	0.001	-0.6	0.4	0	0.1		0.021	0.061	0.043	0.061	0.021	0.25
Calcium-activated chloride channel regulator 1	0.0001	0.3	-0.3	-0.3	0.1		0.0001	0.0001	0.035	0.017	0.0001	0.0001
Calcium-binding mitochondrial carrier protein SCaMC-1	0.0047	0.2	-0.1	-0.2	-0.1		0.15	0.036	0.02	0.011	0.87	0.039
Calcyclin-binding protein	0.001	0.7	-0.4	-0.1	-0.3		0.05	0.05	0.05	0.05	0.28	0.51
Calpain-1 catalytic subunit	0.0001	0.8	0	-0.1	-0.1		0.0039	0.0039	0.0039	0.26	0.031	0.63
Calretinin	0.0001	0.5	-0.1	0.2	0.1		0.00051	0.0041	0.0015	0.00051	0.0015	0.15
Carbamoyl-phosphate synthase [ammonia], mitochondrial	0.001	2.3	-2	-1.3	-1.9		0.021	0.021	0.021	0.021	0.56	0.021
Carbonic anhydrase 1	0.0001	0.2	-0.4	0.6	-0.9		0.015	0.00049	0.00093	0.00035	0.00035	0.00035
Carbonic anhydrase 3	0.001	0	-0.1	0	0.7		0.6	0.92	0.00078	0.074	0.00078	0.00078
Carbonyl reductase [NADPH] 1	0.0001	-0.4	0.1	0.1	0.2		0.01	0.034	0.0052	0.082	0.041	0.0025
Carbonyl reductase [NADPH] 3	0.0001	-0.7	0.2	-0.1	0.6		0.025	0.15	0.0039	0.11	0.0039	0.0039
Carboxypeptidase D	0.003	0.3	-0.2	-0.2	-0.2		0.021	0.021	0.021	0.11	0.11	0.67
Carboxypeptidase Q	0.0001	-0.3	0.1	0	0.5		0.016	0.037	0.0039	0.037	0.0039	0.0039
Caspase-14	0.0001	-0.2	0.5	0	1		0.05	0.05	0.05	0.05	0.05	0.05
Chloride anion exchanger	0.0001	0.5	0.1	-0.1	0.4		0.004	0.0017	0.48	0.025	0.0017	0.0017
Choline transporter-like protein 1	0.0017	0.5	-0.1	-0.1	0		0.021	0.021	0.043	1	0.39	0.15
Choline transporter-like protein 4	0.001	0.7	-0.3	-0.3	0		0.05	0.05	0.05	0.83	0.05	0.05
Choline-phosphate cytidylyltransferase A	0.00099	0.6	-0.2	0	-0.5		0.05	0.05	0.05	0.05	0.05	0.05
Cingulin	0.0001	0.6	-0.3	-0.2	-0.3		0.0032	0.0032	0.0041	0.01	0.65	0.26
Clathrin heavy chain 1	0.0001	0.3	0	0	-0.1		0.036	0.014	0.0043	0.021	0.0001	0.11
Clathrin light chain B	0.003	0.7	-0.2	-0.2	-0.2		0.021	0.021	0.021	0.31	0.89	0.77
Cluster of 3-ketoacyl-CoA thiolase, mitochondrial	0.00017	-0.4	0.1	0.2	0		0.0052	0.0014	0.048	0.44	0.0001	0.0014
Cluster of 60 kDa heat shock protein, mitochondrial	0.0001	-0.7	0	-0.1	0.2		0.00038	0.0022	0.0001	0.019	0.0001	0.0001
Cluster of 60S acidic ribosomal protein P0	0.0001	0.7	-0.4	-0.3	-0.1		0.009	0.009	0.009	0.46	0.009	0.047
Cluster of ADP/ATP translocase 2	0.005	0.9	0	0	-0.2		0.059	0.049	0.041	0.91	0.2	0.55
Cluster of Aldo-keto reductase family 1 member C13	0.001	-0.7	0.3	0.1	0.2		0.021	0.021	0.021	0.043	0.25	0.39
Cluster of Alpha-actinin-4	0.005	0.6	-0.3	-0.3	-0.2		0.0001	0.0001	0.00017	0.16	0.00042	0.0017
Cluster of Alpha-enolase	0.0024	-0.5	0.2	0.1	0.3		0.019	0.056	0.0037	0.16	0.11	0.034
Cluster of Aminopeptidase B	0.0001	0.7	-0.2	-0.1	0		0.0018	0.0053	0.014	0.1	0.00039	0.002
Cluster of Annexin A2	0.00019	0.5	-0.1	-0.2	-0.2		0.0084	0.00098	0.0066	0.0084	0.044	0.044
Cluster of Asparagine--tRNA ligase, cytoplasmic	0.0001	0.9	-0.3	-0.5	-0.4		0.0039	0.0039	0.0039	0.38	0.01	0.87
Cluster of ATP synthase subunit beta, mitochondrial	0.0001	-0.8	0.2	0	0.5		0.0001	0.0001	0.0001	0.0001	0.0001	0.0001
Cluster of Calponin-1	0.00013	-0.1	0.5	0.5	-0.2		0.011	0.0078	0.92	0.45	0.0001	0.0001
Cluster of Caspase-1	0.0011	0.5	-0.1	0	0		0.016	0.028	0.028	0.92	0.75	0.75
Cluster of Citrate synthase, mitochondrial	0.0002	0.5	0.1	-0.2	0		0.047	0.009	0.022	0.009	0.12	0.009
Cluster of Coatomer subunit beta	0.0001	0.8	-0.1	-0.1	-0.2		0.0001	0.0015	0.0001	0.82	0.009	0.16
Cluster of Creatine kinase M-type	0.00032	-0.3	0.2	0.3	-0.3		0.0039	0.0065	0.75	0.75	0.0039	0.0039
Cluster of Cytochrome c oxidase subunit 5A, mitochondrial	0.001	-0.9	0.3	0.2	0.6		0.021	0.021	0.021	0.39	0.15	0.043
Cluster of Cytochrome P450 2C55	0.004	0.3	-0.4	0.4	-1.7		0.35	0.92	0.016	0.076	0.028	0.009
Cluster of Desmin	0.0001	0.6	0.4	0.3	-0.5		0.12	0.024	0.0001	0.0089	0.0001	0.0001
Cluster of Golgi phosphoprotein 3-like	0.0001	0.5	-0.4	-0.3	-0.3		0.009	0.009	0.009	0.17	0.21	0.75
Cluster of Heat shock coate 71 kDa protein	0.00025	-0.5	0.1	0	-0.1		0.00031	0.0036	0.028	0.2	0.93	0.85
Cluster of Heterogeneous nuclear ribonucleoproteins A1 homolog OS	0.0017	0.5	-0.2	0.1	-0.4		0.05	0.05	0.05	0.05	0.05	0.05
Cluster of Hexokinase-1	0.0052	0.3	0.1	-0.1	-0.2		0.15	0.043	0.033	0.015	0.00022	0.13
Cluster of Histone H1.4	0.0001	0.3	1.1	0.1	-0.6		0.009	0.35	0.009	0.009	0.009	0.009
Cluster of Leukotriene-B4 omega-hydroxylase 3	0.001	1.5	-0.6	-0.7	-1.1		0.043	0.043	0.021	0.47	0.021	0.021
Cluster of Major vault protein	0.0001	-0.6	0.1	0.1	0.2		0.00017	0.00027	0.0001	0.018	0.00036	0.0001
Cluster of Myosin regulatory light polypeptide 9	0.001	-0.5	0.4	0.6	-0.2		0.05	0.05	0.51	0.05	0.05	0.05
Cluster of Myosin-11	0.0001	0.7	0.2	0.4	-0.6		0.052	0.25	0.00078	0.027	0.00078	0.00078
Cluster of Myosin-9	0.0001	0.6	-0.2	-0.2	-0.2		0.0001	0.0001	0.0001	0.11	0.019	0.00072
Cluster of Peroxiredoxin-2	0.001	-0.8	0.1	-0.1	0.3		0.013	0.055	0.0051	0.045	0.037	0.0082
Cluster of Plectin	0.0001	0.4	-0.1	0	-0.5		0.0001	0.0001	0.0001	0.14	0.0001	0.0001
Cluster of Polyadenylate-binding protein 1	0.0001	0.8	-0.1	0.1	-0.1		0.025	0.025	0.018	0.025	0.11	0.006
Cluster of Protein Ahnak	0.0001	0.5	0	0	0		0.0001	0.0001	0.0001	0.015	0.44	0.0001
Cluster of Protein Cald1	0.0001	0.4	0	0.2	-0.2		0.003	0.02	0.00043	0.00028	0.0002	0.0001
Cluster of Protein Col6a3	0.0001	-0.1	-0.6	1.1	-1.1		0.0075	0.0001	0.0001	0.0001	0.0001	0.0001
Cluster of Protein Fcgbp	0.0001	0.5	-0.5	-0.4	0		0.0001	0.0001	0.0001	0.11	0.0001	0.0001
Cluster of Protein Tns1	0.00056	-0.2	0.1	0.4	-0.2		0.064	0.004	0.65	0.0017	0.004	0.0017
Cluster of Ras-related protein Rab-6B OS	0.004	0.3	-0.2	-0.1	0		0.05	0.05	0.05	0.51	0.28	0.05
Cluster of Retinal dehydrogenase 1	0.001	0.4	-0.1	0	-0.5		0.42	0.63	0.0039	0.01	0.0039	0.0039
Cluster of Ribosome-binding protein 1	0.0001	0.5	-0.2	-0.2	-0.4		0.00011	0.00012	0.0001	0.025	0.00023	0.0002
Cluster of Selenium-binding protein 1	0.0001	-0.2	0.1	0.2	0.5		0.002	0.00021	0.0001	0.0072	0.0001	0.0001
Cluster of UDP-glucuronosyltransferase 1-7C	0.00064	1	-0.2	-0.1	-0.7		0.016	0.0065	0.0039	0.63	0.11	0.025
Cluster of Villin-1	0.0001	0.6	-0.1	-0.2	-0.2		0.0079	0.00093	0.0023	0.004	0.0001	0.72
Clustered mitochondria protein homolog	0.001	0.6	-0.1	-0.1	0		0.05	0.05	0.05	0.38	0.05	0.51
Coatomer subunit beta'	0.0001	0.5	-0.2	-0.2	-0.3		0.00016	0.0001	0.0001	0.085	0.0051	0.29
Collagen alpha-1(I) chain	0.0001	0.9	-0.1	0.4	-1.1		0.05	0.05	0.05	0.05	0.05	0.05
Complement C3	0.0001	0.4	-0.1	-0.8	-0.7		0.17	0.0019	0.0019	0.00078	0.00078	0.016
Complement component 1 Q subcomponent-binding protein, mitochondrial	0.00093	-1.2	0.3	0.1	0.6		0.021	0.021	0.021	0.021	0.021	0.021
Cytochrome b-c1 complex subunit 2, mitochondrial	0.0001	0.3	-0.1	-0.1	0.1		0.0032	0.0013	0.038	0.35	0.00011	0.00098
Cytochrome b-c1 complex subunit 7	0.002	0.2	-0.3	-0.3	0		0.05	0.05	0.28	0.28	0.05	0.05
Cytochrome c, somatic	0.0001	0.7	0.3	-0.2	-0.2		0.009	0.009	0.009	0.009	0.009	0.46
Cytoplasmic dynein 1 heavy chain 1	0.0001	0.7	0	-0.1	0		0.0001	0.0001	0.0001	0.015	0.15	0.23
Cytoskeleton-associated protein 4	0.005	-0.9	0	0	-0.2		0.05	0.05	0.05	0.66	0.05	0.05
Cytosol aminopeptidase	0.0001	0.8	-0.3	-0.2	-0.3		0.00094	0.0028	0.0015	0.0067	0.21	0.015
D-beta-hydroxybutyrate dehydrogenase, mitochondrial	0.0001	0.5	-0.1	-0.2	-0.3		0.013	0.0088	0.004	0.025	0.0017	0.34
Deleted in maliant brain tumors 1 protein	0.004	-0.3	-0.7	-0.9	-0.8		0.35	0.016	0.12	0.016	0.25	0.016
Delta(3,5)-Delta(2,4)-dienoyl-CoA isomerase, mitochondrial	0.0001	0.5	-0.1	-0.3	-0.3		0.009	0.009	0.009	0.009	0.009	0.75
Delta-aminolevulinic acid dehydratase	0.0001	0.9	-0.2	0	0		0.009	0.009	0.009	0.17	0.047	0.6
Desmoplakin	0.0001	0.6	-0.1	0	-0.3		0.026	0.048	0.0026	0.0034	0.0001	0.0001
Dihydrolipoyllysine-residue succinyltransferase component of 2-oxoglutarate dehydrogenase complex, mitochondrial	0.0024	-0.6	0.2	0	0.2		0.025	0.048	0.018	0.055	0.0027	0.0027
Dihydropyrimidinase-related protein 2	0.00085	-0.4	0.1	0.2	-0.1		0.043	0.00037	0.033	0.033	0.036	0.0056
Dimethylaniline monooxygenase [N-oxide-forming] 2	0.001	0.8	0.2	-0.1	0		0.05	0.05	0.05	0.05	0.05	0.28
Dipeptidase 1	0.00023	1	0	-0.3	-0.4		0.055	0.01	0.0065	0.0039	0.0039	0.078
Dipeptidyl peptidase 3	0.002	0.4	-0.1	-0.1	0		0.019	0.019	0.082	0.2	0.0052	0.0065
Dipeptidyl peptidase 4	0.001	1.3	-0.5	-0.6	-0.2		0.021	0.021	0.021	0.19	0.021	0.021
Disintegrin and metalloproteinase domain-containing protein 10	0.001	0.4	-0.1	-0.2	0		0.05	0.05	0.05	0.05	0.19	0.05
Disks large homolog 1	0.001	0.5	-0.3	-0.2	-0.3		0.021	0.021	0.021	0.083	1	0.25
DNA damage-binding protein 1	0.00071	0.3	-0.2	-0.2	0.1		0.0064	0.0043	0.31	0.36	0.00016	0.00027
DNA-(apurinic or apyrimidinic site) lyase	0.001	0.7	-0.1	-0.2	-0.3		0.05	0.05	0.05	0.05	0.05	0.51
DnaJ homolog subfamily B member 11	0.001	0.7	-0.2	-0.4	-0.5		0.05	0.05	0.05	0.51	0.05	0.05
Dolichyl-diphosphooligosaccharide--protein glycosyltransferase subunit STT3A	0.002	1.2	-0.3	-0.1	-0.4		0.05	0.05	0.05	0.28	0.19	0.081
Dynactin subunit 2	0.0001	-0.4	0.1	0.2	0.2		0.0041	0.0054	0.0031	0.31	0.00067	0.11
Echinoderm microtubule-associated protein-like 2	0.0001	0.4	-0.2	-0.1	-0.5		0.021	0.021	0.021	0.15	0.021	0.021
Echinoderm microtubule-associated protein-like 4	0.001	1.1	-0.1	0	-0.3		0.05	0.05	0.05	0.081	0.05	0.05
ELAV-like protein 1	0.0001	0.7	-0.1	-0.1	-0.1		0.004	0.0017	0.004	0.097	0.28	0.18
Electron transfer flavoprotein subunit beta	0.00095	-0.7	0.1	0.1	0.3		0.0078	0.0078	0.0043	0.45	0.0078	0.094
Elongation factor 1-beta	0.0001	-1.2	0.1	-0.1	0.4		0.009	0.009	0.009	0.016	0.12	0.076
Elongation factor 2	0.00046	0.4	-0.1	-0.2	-0.3		0.06	0.0056	0.0086	0.12	0.0001	0.024
Endoplasmic reticulum resident protein 44	0.0001	0.6	-0.3	-0.3	-0.1		0.01	0.01	0.025	0.87	0.01	0.11
Endoplasmin	0.0001	0.2	-0.4	-0.3	-0.1		0.0001	0.0001	0.019	0.0092	0.0001	0.0001
Epidermal growth factor receptor kinase substrate 8-like protein 3	0.0001	1	0	-0.2	0		0.0039	0.0039	0.0039	0.055	0.26	0.15
Epidermal growth factor receptor substrate 15-like 1	0.001	0.7	-0.2	0	-0.1		0.05	0.05	0.05	0.05	0.28	0.05
Estradiol 17-beta-dehydrogenase 11	0.001	0.9	-0.2	-0.1	-0.5		0.021	0.021	0.021	0.15	0.043	0.021
Eukaryotic translation initiation factor 2 subunit 3, X-linked	0.001	0.4	-0.1	-0.1	-0.2		0.047	0.009	0.012	0.028	0.047	0.35
Eukaryotic translation initiation factor 3 subunit A	0.00095	0.5	-0.2	-0.2	-0.2		0.016	0.016	0.025	0.87	0.87	0.52
Eukaryotic translation initiation factor 3 subunit B	0.0001	0.7	-0.3	-0.2	-0.3		0.0033	0.0046	0.0046	0.6	0.14	0.71
Eukaryotic translation initiation factor 3 subunit C	0.00044	1.2	-0.3	-0.1	-0.4		0.009	0.009	0.009	0.12	0.4	0.022
Eukaryotic translation initiation factor 3 subunit I	0.00096	-0.5	0.1	0	0.3		0.05	0.05	0.05	0.081	0.05	0.05
Eukaryotic translation initiation factor 4 gamma 1	0.002	0.8	-0.1	-0.1	-0.2		0.025	0.025	0.025	0.75	0.48	0.75
Exportin-1	0.001	0.7	0	-0.2	-0.2		0.025	0.01	0.0082	0.078	0.02	0.47
Exportin-2	0.002	0.5	-0.3	-0.2	-0.3		0.025	0.055	0.025	0.42	0.63	0.52
Far upstream element-binding protein 1	0.001	0.6	-0.3	0	-0.4		0.05	0.05	0.05	0.05	0.05	0.05
Far upstream element-binding protein 2	0.0014	0.4	-0.2	-0.1	-0.3		0.0032	0.0065	0.0052	0.089	0.41	0.0052
Fatty acid synthase	0.0001	0	0	0	0.4		0.92	0.76	0.001	0.53	0.0001	0.0001
Fatty acid-binding protein, adipocyte	0.0001	0	0.1	0.3	0.9		0.75	0.11	0.0039	0.025	0.0039	0.0039
Fatty acid-binding protein, liver	0.001	2.2	-1.9	-1.8	-1.4		0.05	0.05	0.05	0.28	0.05	0.05
Ferritin heavy chain	0.0001	-0.4	0.3	0	0.1		0.009	0.016	0.016	0.016	0.028	0.25
Ferritin light chain 1	0.00014	-0.2	0.2	0.2	0.3		0.0017	0.018	0.0088	0.34	0.048	0.22
Fibronectin	0.0001	0.7	-0.1	0.1	-0.8		0.021	0.021	0.021	0.15	0.021	0.021
Filamin-A	0.0001	0.4	0.2	0.3	-0.4		0.16	0.47	0.0001	0.00023	0.0001	0.0001
Filamin-C	0.0001	0.7	0.1	0.1	-0.6		0.0001	0.0001	0.0001	0.1	0.0001	0.0001
Fructose-1,6-bisphosphatase isozyme 2	0.0037	0.2	-0.2	-0.2	0.1		0.041	0.041	0.41	0.33	0.0025	0.00033
Fructose-bisphosphate aldolase B	0.0001	1.4	-0.5	-0.6	-0.5		0.0019	0.0019	0.0019	0.55	0.24	0.57
Galectin-2	0.006	2.3	-2.6	-2	-2.5		0.05	0.05	0.05	0.05	0.51	0.28
Gamma-adducin	0.001	0.4	-0.2	-0.1	-0.3		0.021	0.021	0.021	0.89	0.15	0.56
Gamma-glutamyl hydrolase	0.00081	0.6	0.2	-0.1	0.6		0.12	0.028	0.46	0.009	0.009	0.009
Gasdermin-D	0.0019	0.7	-0.1	-0.1	0.2		0.009	0.016	0.25	0.6	0.016	0.028
Gastrotropin	0.001	2.5	-2.2	-1.8	-2.2		0.05	0.05	0.05	0.05	0.51	0.05
Glutamine--fructose-6-phosphate aminotransferase [isomerizing] 1	0.004	0.6	0.1	-0.1	0		0.052	0.0036	0.023	0.00029	0.0042	0.0025
Glutamyl aminopeptidase	0.0001	2	-1.3	-1	-1.2		0.009	0.009	0.009	0.009	0.12	0.076
Glutathione reductase, mitochondrial	0.0001	0.6	-0.1	-0.2	0.1		0.0001	0.00035	0.0001	0.16	0.0012	0.0035
Glutathione S-transferase A4	0.002	0.4	0	0	-0.5		0.05	0.05	0.05	0.83	0.05	0.05
Glutathione S-transferase Mu 3	0.001	0.5	-0.2	0	-0.1		0.05	0.05	0.05	0.05	0.13	0.51
Glutathione S-transferase Mu 5	0.006	1.2	0.3	0.4	0.3		0.05	0.05	0.05	0.13	0.51	0.83
Glutathione synthetase	0.0001	-0.9	0.1	0.1	0.3		0.0011	0.0016	0.0002	0.7	0.0001	0.00037
Glycerol kinase	0.0001	0.7	-0.4	-0.3	0.2		0.021	0.021	0.021	0.083	0.021	0.03
Glycerol-3-phosphate dehydrogenase [NAD(+)], cytoplasmic	0.002	1.3	-0.6	-0.4	-0.3		0.025	0.025	0.035	0.013	0.013	0.34
Glycine--tRNA ligase	0.003	0.3	-0.3	-0.2	-0.3		0.013	0.027	0.017	0.1	0.45	0.35
Glycogen phosphorylase, brain form	0.003	0.5	0.2	0.1	0.1		0.0018	0.00046	0.00046	0.00065	0.005	0.17
Glycoprotein-N-acetylgalactosamine 3-beta-galactosyltransferase 1	0.001	0.2	-0.3	-0.2	-0.6		0.05	0.05	0.05	0.19	0.05	0.05
Glyoxylate reductase/hydroxypyruvate reductase	0.0042	-0.6	-0.1	0.1	0.1		0.25	0.043	0.021	0.083	0.021	0.15
Golgi apparatus protein 1	0.002	0.4	-0.3	0	-0.3		0.05	0.05	0.05	0.05	0.83	0.05
Golgi membrane protein 1	0.0002	0.5	-0.3	-0.3	-0.1		0.036	0.016	0.059	0.49	0.012	0.021
Guanine nucleotide-binding protein subunit beta-2-like 1	0.002	0.5	-0.3	-0.4	-0.5		0.013	0.013	0.013	0.041	0.025	0.22
Haloacid dehalogenase-like hydrolase domain-containing protein 2	0.002	-1	0.1	0.1	0.2		0.021	0.021	0.021	0.39	0.19	0.67
Haptoglobin	0.0001	0.8	0.2	-1.6	-1.3		0.009	0.009	0.009	0.009	0.009	0.037
Heat shock protein 75 kDa, mitochondrial	0.0001	0.3	-0.4	-0.2	-0.3		0.0017	0.0017	0.0027	0.025	0.013	0.61
Heat shock protein beta-1	0.0031	-0.5	0.5	0.1	-0.2		0.018	0.28	0.85	0.0017	0.0017	0.0017
Heparan N-sulfatase	0.0001	0.3	-0.4	-0.2	0.1		0.05	0.05	0.13	0.05	0.05	0.05
Heterogeneous nuclear ribonucleoprotein M	0.0001	0.4	-0.1	0.1	-0.2		0.0027	0.018	0.0015	0.00022	0.0056	0.00081
Heterogeneous nuclear ribonucleoproteins C1/C2	0.00079	0.5	-0.1	-0.2	-0.1		0.025	0.013	0.018	0.035	0.11	0.018
Hippocalcin-like protein 1	0.0001	0.8	-0.2	-0.2	0.2		0.0039	0.0039	0.0039	0.42	0.0039	0.0039
Histidine triad nucleotide-binding protein 2, mitochondrial	0.002	-1	0.2	0.2	0.3		0.05	0.05	0.05	0.28	0.05	0.05
Histone H1.0	0.002	-0.5	1.2	0.4	-0.6		0.05	0.05	0.83	0.05	0.05	0.05
Histone H1.5	0.0001	0.4	0.9	0	-0.5		0.05	0.05	0.05	0.05	0.05	0.05
Hydroxymethylglutaryl-CoA synthase, mitochondrial	0.0001	-0.4	0	-0.2	-1.5		0.00078	0.012	0.00078	0.021	0.00078	0.00078
Importin subunit beta-1	0.003	0.3	-0.2	0	0.2		0.00069	0.026	0.44	0.00041	0.0001	0.00012
Importin-7	0.0001	0.9	-0.2	-0.1	0		0.0039	0.0039	0.0039	0.42	0.045	0.2
Inorganic pyrophosphatase	0.0001	-0.8	0.3	0	0.7		0.00035	0.0017	0.00035	0.00035	0.00035	0.00035
Inorganic pyrophosphatase 2, mitochondrial	0.0001	-0.7	0.1	0.1	0.1		0.0039	0.0039	0.0039	0.52	1	0.87
Inosine triphosphate pyrophosphatase	0.0013	-0.2	0	0.1	0.3		0.13	0.05	0.05	0.51	0.05	0.05
Interleukin-1 receptor antagonist protein	0.001	-1	0.4	-0.1	0.7		0.05	0.05	0.05	0.05	0.05	0.05
Isovaleryl-CoA dehydrogenase, mitochondrial	0.005	-0.6	-0.1	0	0.2		0.11	0.01	0.01	0.0082	0.0051	0.02
Ladinin-1	0.0001	0.7	-0.1	0	-0.1		0.0049	0.0033	0.0033	0.18	0.18	0.18
Lamin-B2	0.00019	0.1	-0.1	-0.1	0		0.012	0.0031	0.22	0.18	0.0001	0.0001
Laminin subunit beta-2	0.0002	0.3	-0.1	0.3	-0.7		0.012	0.92	0.009	0.009	0.009	0.009
Laminin subunit gamma-1	0.0001	0.3	-0.2	0.1	-0.6		0.018	0.25	0.0017	0.0017	0.0049	0.0017
Leiomodin-1	0.00076	0.6	0.1	0.5	-0.2		0.021	0.19	0.021	0.083	0.03	0.021
Leucine-rich PPR motif-containing protein, mitochondrial	0.0001	0.7	-0.2	-0.3	-0.3		0.0018	0.0018	0.0014	0.026	0.18	0.67
Lipoamide acyltransferase component of branched-chain alpha-keto acid dehydrogenase complex, mitochondrial	0.0026	0.3	-0.2	-0.2	0.1		0.009	0.009	0.53	0.53	0.009	0.016
Lupus La protein homolog	0.0001	0.8	0.4	0.1	0.1		0.009	0.009	0.009	0.12	0.028	0.92
Lysine--tRNA ligase	0.002	0.8	-0.2	-0.3	-0.2		0.021	0.021	0.021	0.77	0.021	0.25
Magnesium-dependent phosphatase 1	0.001	-0.6	0.1	-0.1	0.1		0.05	0.05	0.05	0.13	0.28	0.05
Maleylacetoacetate isomerase	0.002	-0.3	-0.1	0.1	0.5		0.25	0.028	0.016	0.047	0.009	0.009
Maltase-glucoamylase	0.0001	2	-1.6	-1	-1.3		0.00078	0.00078	0.00078	0.00078	0.00078	0.0011
MCG13663, isoform CRA_a	0.0001	0.8	-0.1	0	-0.1		0.0016	0.0046	0.0033	0.059	0.027	0.37
Membrane-associated progesterone receptor component 1	0.001	1	-0.3	-0.3	-0.2		0.021	0.021	0.021	0.47	0.083	0.083
Metastasis-associated protein MTA2	0.00048	0.4	0.1	-0.1	-0.5		0.05	0.05	0.05	0.05	0.05	0.05
Microsomal triglyceride transfer protein large subunit	0.0001	2.4	-2	-1.7	-2.1		0.009	0.009	0.009	0.037	0.4	0.095
Mimecan	0.002	-0.6	0.1	0.1	-0.6		0.021	0.021	0.25	0.56	0.021	0.021
Mitochondrial 2-oxoglutarate/malate carrier protein	0.00097	0.8	0.2	-0.2	-0.1		0.043	0.021	0.021	0.043	0.083	0.25
Mitochondrial amidoxime reducing component 2	0.002	1.1	-0.3	-0.3	-0.5		0.021	0.021	0.021	0.67	0.11	0.021
Mitochondrial fission 1 protein	0.001	0.6	-0.4	-0.4	0.1		0.05	0.05	0.05	0.83	0.05	0.05
Mitochondrial import inner membrane translocase subunit Tim13	0.002	-0.2	0	0	0.3		0.05	0.13	0.05	0.83	0.05	0.05
Mitogen-activated protein kinase 1	0.00098	0.2	0	-0.2	-0.1		0.05	0.05	0.05	0.05	0.13	0.05
Mucin-13	0.00019	-0.4	0.3	-0.1	0.5		0.021	0.15	0.021	0.021	0.021	0.021
Mucin-2 (Fragments)	0.0001	0.2	-0.1	-0.2	-0.6		0.00084	0.0001	0.0001	0.0015	0.0001	0.0001
Murinoglobulin-1	0.0001	0	-0.1	-0.4	0.2		0.92	0.00044	0.057	0.0001	0.00024	0.0001
Myosin-14	0.0001	0.5	-0.1	-0.1	-0.2		0.0001	0.0001	0.0001	0.7	0.0001	0.0001
Na(+)/H(+) exchange regulatory cofactor NHE-RF1	0.00087	0.9	-0.2	-0.2	0.1		0.037	0.01	0.055	0.63	0.016	0.0082
N-acetylated-alpha-linked acidic dipeptidase-like protein	0.0001	1.8	-1.5	-1	-1.4		0.0039	0.0039	0.0039	0.0065	0.15	0.016
N-acetylgalactosaminyltransferase 7	0.0001	0.2	-0.2	-0.2	-0.5		0.016	0.01	0.0039	0.58	0.0039	0.0039
NADH dehydrogenase [ubiquinone] 1 alpha subcomplex subunit 9, mitochondrial	0.001	0.8	0.2	0.2	-0.1		0.05	0.05	0.05	0.51	0.05	0.13
NADH dehydrogenase [ubiquinone] flavoprotein 2, mitochondrial	0.006	-0.3	-0.1	-0.1	0.3		0.25	0.35	0.016	0.75	0.009	0.009
NADH dehydrogenase [ubiquinone] iron-sulfur protein 2, mitochondrial	0.0001	0.6	0	0	-0.1		0.018	0.018	0.006	0.75	0.013	0.064
NADH dehydrogenase [ubiquinone] iron-sulfur protein 3, mitochondrial	0.00045	-0.8	0.1	0.1	0.3		0.0087	0.012	0.0016	0.96	0.00078	0.00078
NADH-cytochrome b5 reductase 3	0.001	0.9	-0.2	-0.3	-0.4		0.05	0.05	0.05	0.28	0.05	0.13
NADH-ubiquinone oxidoreductase 75 kDa subunit, mitochondrial	0.0001	-0.4	-0.2	0	0.4		0.23	0.018	0.0001	0.00011	0.0001	0.0001
Neutral alpha-glucosidase AB	0.0016	0.3	-0.2	-0.1	-0.1		0.0044	0.02	0.013	0.048	0.001	0.25
NFU1 iron-sulfur cluster scaffold homolog, mitochondrial	0.003	-0.1	0.1	0.1	0.4		0.28	0.05	0.05	0.28	0.05	0.05
Nicastrin	0.0001	0.4	-0.1	-0.2	0.1		0.021	0.021	0.021	0.89	0.021	0.021
Nicotinamide phosphoribosyltransferase	0.001	0.6	-0.1	-0.2	-0.3		0.021	0.021	0.021	0.25	0.083	0.39
Nidogen-1	0.00057	0	0	0.2	-0.4		0.94	0.049	0.054	0.00067	0.00033	0.00018
Nuclear migration protein nudC	0.0001	0.7	-0.4	-0.3	-0.3		0.0017	0.0017	0.0017	0.064	0.0017	0.11
Nucleobindin-1	0.00038	0.2	-0.2	-0.1	0		0.0083	0.022	0.24	0.024	0.0001	0.0001
Nucleoprotein TPR	0.002	0.1	-0.3	-0.1	-0.4		0.055	0.28	0.018	0.0033	0.011	0.0017
Nucleosome assembly protein 1-like 1	0.00057	-0.8	0.1	-0.1	0.3		0.021	0.021	0.021	0.083	0.021	0.021
OCIA domain-containing protein 2	0.001	1	0.2	0.2	0.1		0.05	0.05	0.05	0.51	0.13	0.51
Omega-amidase NIT2	0.001	-0.6	0.1	0.1	0.2		0.05	0.05	0.05	0.51	0.05	0.05
Ornithine aminotransferase, mitochondrial	0.0001	0.9	-0.4	-0.1	-0.3		0.00021	0.0019	0.00067	0.00016	0.00029	0.00038
Osteoclast-stimulating factor 1	0.0001	-0.5	0.1	-0.1	0.4		0.021	0.021	0.021	0.15	0.021	0.021
Pancreatic alpha-amylase	0.0001	1.6	-1.6	0.9	-1.4		0.021	0.15	0.021	0.021	0.021	0.021
Pancreatic triacylglycerol lipase	0.00017	-0.8	-2.3	-0.2	-1.5		0.021	0.25	0.021	0.021	0.021	0.021
PCTP-like protein	0.00013	0.1	-0.1	-0.2	-0.2		0.016	0.009	0.009	0.037	0.35	0.037
PDZ and LIM domain protein 1	0.006	-0.4	0	0.1	-0.1		0.17	0.15	0.23	0.23	0.26	0.17
PDZ and LIM domain protein 3	0.0001	-0.4	0.3	0.6	-0.2		0.021	0.021	0.083	0.043	0.043	0.021
PDZ and LIM domain protein 7	0.001	-1.1	0.3	0.5	0		0.05	0.05	0.05	0.05	0.13	0.05
Peptidyl-prolyl cis-trans isomerase FKBP4	0.0001	0.4	-0.3	-0.2	-0.1		0.00057	0.0014	0.017	0.0028	0.00027	0.0095
Peripherin	0.0008	0.3	-0.1	0	-0.1		0.0065	0.025	0.0039	0.031	0.34	0.42
Peroxiredoxin-4	0.003	0.5	-0.5	-0.2	-0.3		0.021	0.021	0.021	0.083	0.11	0.39
Peroxiredoxin-5, mitochondrial	0.0039	-0.8	0.2	0.1	0.6		0.12	0.12	0.016	0.047	0.009	0.009
Peroxiredoxin-6	0.00067	-0.2	0.3	0	0.7		0.028	0.45	0.00051	0.00021	0.00016	0.00016
Peroxisomal acyl-coenzyme A oxidase 1	0.0021	0.5	0	-0.3	-0.4		0.4	0.059	0.041	0.01	0.00078	0.53
Persulfide dioxygenase ETHE1, mitochondrial	0.0002	-1	0.1	0	0		0.0063	0.012	0.0087	0.79	0.75	0.75
Phenylalanine--tRNA ligase beta subunit	0.0038	0.7	0	-0.2	-0.1		0.043	0.021	0.043	0.15	0.043	0.39
Phosphate carrier protein, mitochondrial	0.0001	1.4	0	0	-0.1		0.0017	0.0017	0.0017	0.22	0.22	0.34
Phosphatidylethanolamine-binding protein 1	0.0035	-1.1	-0.2	-0.1	0.1		0.21	0.076	0.009	0.25	0.028	0.06
Phosphoglucomutase-like protein 5	0.0001	0.6	0.2	0.2	-0.6		0.00033	0.0011	0.0001	0.22	0.0001	0.0001
Plastin-1	0.0001	0.9	-0.3	-0.3	-0.1		0.0017	0.0035	0.0095	0.065	0.0012	0.054
Platelet-derived growth factor subunit B	0.002	2.2	-1.8	-1.5	-1.7		0.021	0.021	0.021	0.021	0.39	0.021
Polymerase I and transcript release factor	0.001	-0.3	0.1	0.1	0		0.006	0.0088	0.064	0.48	0.025	0.097
Polypeptide N-acetylgalactosaminyltransferase 4	0.0001	0.3	-0.4	-0.2	-0.5		0.016	0.028	0.009	0.016	0.009	0.009
Potassium-transporting ATPase alpha chain 2	0.0001	-0.2	0.4	0	0.8		0.001	0.076	0.00016	0.00088	0.00016	0.00016
Prelamin-A/C	0.0001	0.6	-0.2	-0.1	-0.4		0.0001	0.0001	0.0001	0.16	0.0001	0.0001
Pre-mRNA-processing-splicing factor 8	0.0045	0.4	0.1	-0.1	-0.3		0.83	0.17	0.009	0.016	0.009	0.009
Pre-mRNA-splicing factor ATP-dependent RNA helicase DHX15	0.00013	0.6	0.1	-0.3	-0.3		0.076	0.009	0.009	0.009	0.022	0.35
Programmed cell death protein 6	0.0001	0.8	-0.1	0	0.1		0.009	0.009	0.009	0.75	0.016	0.016
Prohibitin	0.00039	-0.8	0	0	0.3		0.058	0.07	0.0054	0.69	0.00035	0.00035
ProSAAS	0.0001	-0.3	0	0.2	0.2		0.021	0.021	0.021	0.021	0.021	0.77
Prosaposin	0.0001	0.7	0	-0.1	0.3		0.009	0.009	0.009	0.076	0.009	0.009
Prostaglandin reductase 2	0.003	-0.4	0	0.1	0.3		0.05	0.05	0.05	0.13	0.05	0.05
Proteasome subunit alpha type-3	0.002	0.2	0	-0.1	0.2		0.14	0.048	0.48	0.018	0.0017	0.0017
Proteasome subunit beta type-5	0.001	0.3	-0.1	-0.2	-0.2		0.043	0.021	0.021	0.56	0.083	1
Protein arginine N-methyltransferase 1	0.001	0.5	-0.1	-0.2	-0.2		0.05	0.05	0.05	0.05	0.05	0.51
Protein DEK	0.00033	0.8	-0.1	-0.2	-0.4		0.021	0.021	0.021	0.11	0.021	0.021
Protein disulfide-isomerase A3	0.001	-0.5	0	0	0.1		0.024	0.028	0.0084	0.96	0.00088	0.021
Protein disulfide-isomerase A6	0.0001	0.5	-0.4	-0.2	-0.1		0.00035	0.00093	0.015	0.0041	0.00035	0.0036
Protein Lmo7	0.001	0.6	-0.2	-0.2	-0.3		0.009	0.028	0.009	0.6	0.047	0.17
Protein POF1B	0.001	0.7	-0.1	0	-0.5		0.05	0.05	0.05	0.51	0.05	0.05
Protein S100-A13	0.002	0	-0.1	-0.2	0.2		0.28	0.05	0.13	0.28	0.05	0.05
Protein Sf3b2	0.001	0.5	-0.4	-0.2	-0.4		0.021	0.021	0.021	0.021	0.67	0.021
Protein Svs2	0.0001	-1.2	1.5	-0.1	-1.5		0.0011	0.012	0.036	0.00078	0.00078	0.00078
Protein transport protein Sec31A	0.0028	0.4	-0.1	0	-0.3		0.078	0.42	0.0065	0.11	0.025	0.0039
Protein-glutamine gamma-glutamyltransferase 2	0.0003	0.3	-0.2	0	-0.6		0.05	0.05	0.05	0.05	0.05	0.05
Protein-glutamine gamma-glutamyltransferase E	0.0001	0.3	0.1	0	0.8		0.057	0.0098	0.0001	0.014	0.0001	0.0001
Prothymosin alpha	0.001	0.2	-0.8	-0.5	-0.5		0.05	0.05	0.05	0.05	0.05	0.51
Pterin-4-alpha-carbinolamine dehydratase	0.002	0.7	-0.3	-0.2	-0.1		0.05	0.05	0.05	0.28	0.28	0.28
Puromycin-sensitive aminopeptidase	0.002	0.4	-0.1	-0.1	0.1		0.0035	0.0032	0.061	0.4	0.0001	0.0001
Pyrethroid hydrolase Ces2e	0.001	1.5	-0.6	-0.5	-0.7		0.05	0.05	0.05	0.13	0.13	0.05
Pyruvate carboxylase	0.00068	-0.2	0.2	0.1	0.4		0.07	0.054	0.0016	0.75	0.0001	0.0001
Pyruvate dehydrogenase E1 component subunit alpha, somatic form, mitochondrial	0.00088	-0.3	0	0	0.1		0.047	0.085	0.0092	0.25	0.0092	0.0054
Quinone oxidoreductase	0.0036	-0.3	0.3	0.1	0.3		0.05	0.28	0.05	0.05	0.66	0.13
Ras GTPase-activating-like protein IQGAP2	0.0001	0.7	0	-0.1	-0.2		0.0094	0.0032	0.0047	0.00016	0.00028	0.11
Ras-related protein Rab-25	0.0001	0.3	-0.1	-0.3	0		0.016	0.009	0.028	0.009	0.06	0.009
Ras-related protein Rab-7a	0.002	-0.5	0	0.1	0.1		0.025	0.025	0.0088	0.48	0.025	0.048
Regulator of nonsense transcripts 1	0.003	0.7	-0.4	-0.3	-0.5		0.05	0.05	0.05	0.05	0.51	0.05
Ribonuclease UK114	0.001	-0.4	0.1	0	0.4		0.05	0.19	0.05	0.28	0.05	0.05
RNA-binding protein 14	0.00056	-0.7	0.1	0.3	0		0.021	0.021	0.021	0.021	0.25	0.021
RNA-binding protein 3	0.0023	-0.7	0.3	0.3	0.1		0.05	0.05	0.05	0.83	0.28	0.28
RNA-binding protein Raly (Fragment)	0.001	0.7	-0.1	0	0		0.05	0.05	0.05	0.081	0.081	0.51
Sarcolemmal membrane-associated protein	0.00087	0.1	0.1	0.2	-0.3		0.92	0.67	0.018	0.036	0.00078	0.0011
Sarcoplasmic/endoplasmic reticulum calcium ATPase 2	0.0005	0.5	-0.2	-0.1	-0.4		0.031	0.085	0.0017	0.052	0.00035	0.00035
Sec1 family domain-containing protein 1	0.001	-0.6	0.2	0.1	0.1		0.05	0.05	0.05	0.13	0.05	0.83
Secretagogin	0.001	0.5	-0.3	0	0		0.05	0.05	0.05	0.28	0.28	0.28
Secretogranin-2	0.001	-0.7	0.1	0.3	0		0.05	0.05	0.05	0.05	0.51	0.05
Seminal vesicle secretory protein 5	0.001	-1.4	1.4	-0.2	-1.3		0.05	0.05	0.83	0.05	0.05	0.05
Seminal vesicle secretory protein 6	0.003	-0.7	1.3	0.1	-1		0.05	0.05	0.13	0.05	0.05	0.05
Septin-7	0.0001	0.7	-0.2	-0.1	-0.4		0.009	0.009	0.009	0.25	0.12	0.12
Serine protease inhibitor A3K	0.00038	-0.6	0.2	-0.1	0.1		0.012	0.021	0.0087	0.00078	0.25	0.0016
Serine protease inhibitor A3N	0.00077	-0.2	0.6	-1.4	-1.1		0.05	0.05	0.05	0.05	0.05	0.05
Serine/arginine-rich splicing factor 7	0.0001	0.7	-0.3	-0.2	0.1		0.021	0.021	0.021	0.25	0.021	0.021
Serine/threonine-protein kinase 24	0.001	-0.5	0.1	0.1	0.2		0.021	0.021	0.021	1	0.083	0.021
Serine/threonine-protein phosphatase 2A 65 kDa regulatory subunit A alpha isoform	0.0001	-0.5	0.1	0.2	0.5		0.01	0.0065	0.0032	0.31	0.00016	0.00058
Serpin B5	0.00046	-0.2	0.2	0	0.4		0.018	0.18	0.0012	0.0028	0.00072	0.00044
Serrate RNA effector molecule homolog	0.003	0.4	-0.1	-0.2	-0.2		0.05	0.05	0.05	0.51	0.05	0.51
Serum deprivation-response protein	0.0046	-0.8	0.4	0.4	0.4		0.021	0.021	0.021	0.77	0.39	0.77
Short-chain specific acyl-CoA dehydrogenase, mitochondrial	0.0001	-0.4	0	0	0.3		0.0019	0.013	0.00016	0.97	0.0019	0.0019
Single-stranded DNA-binding protein	0.001	0.5	-0.1	-0.3	-0.2		0.05	0.05	0.05	0.05	0.19	0.19
Smoothelin	0.0001	0.2	0.1	0.2	-0.5		0.33	0.89	0.0054	0.01	0.00035	0.00035
Sodium/potassium-transporting ATPase subunit beta-1	0.001	0.5	-0.3	-0.5	-0.1		0.05	0.05	0.05	0.05	0.05	0.05
Sorbin and SH3 domain-containing protein 1	0.00083	0.4	0.2	0.3	-0.4		0.17	0.92	0.009	0.14	0.009	0.009
Sorting nexin-5	0.0034	0.5	0.1	0.1	-0.2		0.083	0.021	0.021	0.39	0.03	0.03
Spectrin alpha chain, non-erythrocytic 1	0.0001	0.6	-0.1	-0.1	-0.2		0.0001	0.0001	0.0001	0.00061	0.0001	0.0001
Spectrin beta chain, non-erythrocytic 1	0.0001	0.4	0	-0.1	-0.2		0.0013	0.00024	0.0001	0.01	0.0001	0.0001
Splicing factor 3A subunit 1	0.003	0.7	0	0.1	-0.1		0.05	0.05	0.05	0.83	0.13	0.28
Splicing factor, proline- and glutamine-rich	0.00011	0.4	0	0	-0.1		0.0016	0.0087	0.0033	0.12	0.34	0.074
Stomatin-like protein 2, mitochondrial	0.00057	0.3	-0.3	-0.2	-0.1		0.009	0.016	0.009	0.92	0.016	0.35
Superoxide dismutase [Cu-Zn]	0.0001	0.6	-0.1	-0.2	0.2		0.0017	0.0017	0.0017	0.22	0.004	0.006
Suppressor of tumorigenicity 14 protein homolog	0.0001	0.2	-0.3	-0.3	-0.1		0.016	0.009	0.022	1	0.016	0.028
Synemin	0.00036	0.2	0.3	0.2	-0.4		0.89	0.3	0.0038	0.00062	0.0001	0.0001
Tax_Id	0.0001	0.6	0	0.1	1.5		0.00078	0.00078	0.0063	0.6	0.00078	0.00078
Tax_Id	0.0001	-0.2	-0.1	-0.8	0.7		0.52	0.0039	0.0039	0.0039	0.0039	0.0039
T-complex protein 1 subunit delta	0.0001	0.7	-0.3	-0.2	-0.4		0.0025	0.0025	0.0025	0.034	0.011	0.0065
T-complex protein 1 subunit eta	0.004	0.5	-0.2	-0.2	-0.3		0.023	0.039	0.017	0.017	0.071	0.061
Thimet oligopeptidase	0.0001	0.5	-0.1	0	0.1		0.009	0.009	0.009	0.6	0.028	0.047
Thioredoxin reductase 2, mitochondrial	0.001	0.6	-0.2	0	-0.3		0.05	0.05	0.05	0.05	0.05	0.05
Threonine--tRNA ligase, cytoplasmic	0.0034	0.8	0	-0.2	-0.1		0.035	0.025	0.025	0.041	0.65	0.041
Trans-2-enoyl-CoA reductase, mitochondrial	0.00086	-0.4	0.1	0	0.3		0.028	0.076	0.009	0.35	0.009	0.009
Transgelin	0.005	-0.2	0.3	0.2	0.2		0.036	0.086	0.086	0.46	0.018	0.66
Transient receptor potential cation channel subfamily M member 4	0.002	0.6	-0.4	-0.1	-0.3		0.05	0.05	0.05	0.05	0.51	0.05
Transmembrane 9 superfamily member 3	0.0001	1	-0.4	-0.2	-0.5		0.0039	0.0039	0.0039	0.0039	0.037	0.013
Trifunctional enzyme subunit alpha, mitochondrial	0.002	-0.1	0.2	0.1	0.2		0.01	0.44	0.035	0.00074	0.027	0.00085
Trifunctional enzyme subunit beta, mitochondrial	0.0012	-0.4	0.2	0.1	0.1		0.0063	0.036	0.046	0.016	0.0023	0.4
Triosephosphate isomerase	0.0001	-0.6	0	0	0.4		0.023	0.028	0.00051	0.88	0.00088	0.0052
Tripartite motif-containing protein 16	0.004	-0.3	0.1	-0.1	0.2		0.021	0.021	0.021	0.15	0.021	0.043
Tropomodulin-3	0.0001	-0.7	0.2	0.2	0.4		0.009	0.009	0.009	0.25	0.037	0.17
Tropomyosin alpha-4 chain	0.0001	0.7	-0.4	-0.2	0		0.00035	0.00093	0.00067	0.019	0.00093	0.085
Tropomyosin beta chain	0.0039	-0.8	0.4	0.4	-0.1		0.064	0.064	0.18	0.41	0.0017	0.0017
Tyrosine--tRNA ligase, cytoplasmic	0.001	0.5	-0.4	-0.3	-0.2		0.018	0.048	0.064	0.0027	0.0017	0.035
U2 small nuclear ribonucleoprotein A'	0.003	0.6	-0.1	-0.1	-0.1		0.021	0.021	0.021	0.56	0.67	0.77
Ubiquitin carboxyl-terminal hydrolase 14	0.001	0.6	-0.2	-0.2	-0.1		0.021	0.021	0.021	0.56	0.15	0.083
Ubiquitin-40S ribosomal protein S27a	0.0001	0.8	-0.2	-0.2	0		0.009	0.009	0.009	0.46	0.009	0.009
Ubiquitin-conjugating enzyme E2 variant 1	0.002	0.1	-0.1	0	0.2		0.05	0.05	0.13	0.51	0.05	0.05
UMP-CMP kinase	0.0021	-0.8	0.2	0.2	0.4		0.11	0.078	0.01	0.52	0.025	0.15
Unconventional myosin-Ia	0.0001	0.7	0.1	-0.2	0.1		0.00023	0.0001	0.00027	0.0001	0.73	0.0001
Unconventional myosin-VI	0.0001	0.9	0.1	-0.1	0		0.00081	0.00053	0.00066	0.0015	0.053	0.033
Unconventional myosin-VIIb	0.0001	0.8	-0.2	-0.1	-0.2		0.0054	0.0041	0.0071	0.35	0.86	0.17
Valine--tRNA ligase	0.004	0.4	0	-0.1	-0.2		0.045	0.017	0.014	0.11	0.0023	0.38
Vinculin	0.0001	0.6	-0.1	0.1	-0.4		0.0001	0.0012	0.0001	0.0001	0.0001	0.0001
Voltage-dependent anion-selective channel protein 1	0.0013	0.1	0.3	-0.1	0.2		0.27	0.065	0.4	0.00017	0.015	0.0001
V-type proton ATPase subunit F	0.0011	-0.9	0.3	0.2	0.5		0.05	0.05	0.05	0.05	0.51	0.51
Xaa-Pro dipeptidase	0.0001	1.4	-0.8	-0.6	-0.6		0.0039	0.0039	0.0039	0.016	0.0039	0.63
Zymogen granule membrane protein 16	0.0001	0.2	0.3	-0.4	-0.1		0.75	0.009	0.028	0.009	0.009	0.009

## Sheet: Table S5
Table S6. All matching host mucosal and submucosal proteins identified by 4 or more peptides
Proteins	Location	P value	Low fat~Milk	Low fat~Olive	Low fat~Corn	Milk ~ Olive	Corn~Milk	Corn~Olive
2,4-dienoyl-CoA reductase, mitochondrial	Mucosal	0.002	0.066	0.055	0.2	0.34	0.0039	0.0039
	Submucosal	0.002	0.028	0.12	1	0.46	0.009	0.009
3'(2'),5'-bisphosphate nucleotidase 1	Mucosal	0.002	0.006	0.035	0.14	0.13	0.0027	0.025
	Submucosal	0.00044	0.0016	0.0087	0.035	0.6	0.00078	0.01
3-mercaptopyruvate sulfurtransferase	Mucosal	0.0001	0.009	0.009	0.009	0.047	0.076	0.009
	Submucosal	0.0001	0.009	0.009	1	0.53	0.076	0.009
40S ribosomal protein S2	Mucosal	0.0001	0.041	0.0017	0.0017	0.0017	0.0017	0.0017
	Submucosal	0.0001	0.0039	0.016	0.51	0.11	0.0039	0.025
60S ribosomal protein L5	Mucosal	0.002	0.2	0.025	0.025	0.025	0.055	0.34
	Submucosal	0.001	0.25	0.083	0.13	0.19	0.043	0.043
Aconitate hydratase, mitochondrial	Mucosal	0.0001	0.0001	0.0001	0.0001	0.0001	0.0001	0.67
	Submucosal	0.0001	0.00041	0.039	0.098	< 0.0001	< 0.0001	< 0.0001
Activated RNA polymerase II transcriptional coactivator p15	Mucosal	0.0001	0.021	0.021	0.021	0.39	0.021	0.021
	Submucosal	0.0001	0.05	0.05	0.44	0.05	0.05	0.51
Aldehyde dehydrogenase, mitochondrial	Mucosal	0.0001	0.0075	0.024	0.00014	0.0012	0.0001	0.0001
	Submucosal	0.0001	0.0013	< 0.0001	0.19	< 0.0001	< 0.0001	0.82
Alpha-mannosidase 2	Mucosal	0.001	0.021	0.021	0.021	0.15	0.083	0.021
	Submucosal	0.00027	0.11	0.061	0.44	0.061	0.25	0.043
Aminopeptidase N	Mucosal	0.0001	0.0039	0.0039	0.0039	0.0039	0.0039	0.63
	Submucosal	0.0001	0.00041	1	0.00016	0.00035	0.00079	0.0031
Annexin A3	Mucosal	0.0001	0.019	0.049	0.00051	0.00016	0.00038	0.00021
	Submucosal	0.0001	0.00044	0.00018	< 0.0001	0.028	0.023	0.054
Apolipoprotein A-I	Mucosal	0.0001	0.025	0.035	0.006	0.0017	0.0017	0.0017
	Submucosal	0.0001	0.082	0.014	0.00081	0.24	0.00027	0.00027
Apolipoprotein E	Mucosal	0.0001	0.0017	0.0017	0.0017	0.013	0.22	0.28
	Submucosal	0.0053	0.047	0.076	0.23	0.12	0.047	0.06
Aspartate aminotransferase, cytoplasmic	Mucosal	0.004	0.11	0.096	0.013	0.76	0.0015	0.0052
	Submucosal	0.0001	0.00035	0.00035	< 0.0001	0.00057	0.00049	0.0023
ATP-dependent (S)-NAD(P)H-hydrate dehydratase	Mucosal	0.0028	0.05	0.05	0.05	0.05	0.51	0.05
	Submucosal	0.00018	0.064	0.0017	0.021	0.018	0.14	0.018
Bifunctional glutamate/proline--tRNA ligase	Mucosal	0.00053	0.0003	0.00013	0.00053	0.0037	0.11	0.014
	Submucosal	0.001	0.71	0.028	0.12	0.0041	0.82	0.0032
Cadherin-17	Mucosal	0.001	0.79	0.65	0.0093	0.01	0.0001	0.0001
	Submucosal	0.0001	0.0033	0.00094	0.04	0.0014	0.00078	1
Calcium-activated chloride channel regulator 1	Mucosal	0.0001	0.0001	0.0001	0.035	0.017	0.0001	0.0001
	Submucosal	0.0001	< 0.0001	< 0.0001	< 0.0001	< 0.0001	< 0.0001	0.006
Carbonic anhydrase 3	Mucosal	0.001	0.6	0.92	0.00078	0.074	0.00078	0.00078
	Submucosal	0.0001	0.0017	0.0017	0.014	0.0017	0.0017	0.0017
Carbonyl reductase [NADPH] 1	Mucosal	0.0001	0.01	0.034	0.0052	0.082	0.041	0.0025
	Submucosal	0.0004	0.17	0.0071	0.0036	0.0071	0.0017	0.57
Chloride anion exchanger	Mucosal	0.0001	0.004	0.0017	0.48	0.025	0.0017	0.0017
	Submucosal	0.0001	0.66	0.05	0.44	0.05	0.05	0.05
Clathrin heavy chain 1	Mucosal	0.0001	0.036	0.014	0.0043	0.021	0.0001	0.11
	Submucosal	0.0001	< 0.0001	0.013	0.093	< 0.0001	0.27	< 0.0001
Collagen alpha-1(I) chain	Mucosal	0.0001	0.05	0.05	0.05	0.05	0.05	0.05
	Submucosal	0.0001	0.009	0.12	0.00093	0.009	0.009	0.009
Complement C3	Mucosal	0.0001	0.17	0.0019	0.0019	0.00078	0.00078	0.016
	Submucosal	0.0001	< 0.0001	< 0.0001	0.00017	< 0.0001	< 0.0001	< 0.0001
Cytochrome b-c1 complex subunit 1, mitochondrial	Mucosal	0.0068	0.22	0.2	0.02	0.41	0.00091	0.00072
	Submucosal	0.0001	0.0058	< 0.0001	0.44	0.00072	0.0028	0.12
Cytochrome b-c1 complex subunit 2, mitochondrial	Mucosal	0.0001	0.0032	0.0013	0.038	0.35	0.00011	0.00098
	Submucosal	0.0001	0.065	0.00059	0.12	0.0027	0.12	0.00048
Cytochrome c, somatic	Mucosal	0.0001	0.009	0.009	0.009	0.009	0.009	0.46
	Submucosal	0.0001	0.043	0.043	0.56	0.021	0.021	0.021
Cytoplasmic dynein 1 heavy chain 1	Mucosal	0.0001	0.0001	0.0001	0.0001	0.015	0.15	0.23
	Submucosal	0.0001	< 0.0001	< 0.0001	0.022	< 0.0001	< 0.0001	< 0.0001
Cytosol aminopeptidase	Mucosal	0.0001	0.00094	0.0028	0.0015	0.0067	0.21	0.015
	Submucosal	0.0001	0.15	< 0.0001	< 0.0001	0.00034	0.0094	< 0.0001
Deleted in maliant brain tumors 1 protein	Mucosal	0.004	0.35	0.016	0.12	0.016	0.25	0.016
	Submucosal	0.00014	0.021	0.021	0.0039	0.021	0.021	0.021
Dimethylaniline monooxygenase [N-oxide-forming] 2	Mucosal	0.001	0.05	0.05	0.05	0.05	0.05	0.28
	Submucosal	0.0001	0.0039	0.0039	0.23	0.0039	0.0039	0.0039
Dipeptidase 1	Mucosal	0.00023	0.055	0.01	0.0065	0.0039	0.0039	0.078
	Submucosal	0.002	0.043	0.021	0.009	0.021	0.15	0.043
DNA damage-binding protein 1	Mucosal	0.00071	0.0064	0.0043	0.31	0.36	0.00016	0.00027
	Submucosal	0.0001	0.0011	0.66	0.037	0.039	< 0.0001	0.1
DnaJ homolog subfamily B member 11	Mucosal	0.001	0.05	0.05	0.05	0.51	0.05	0.05
	Submucosal	0.00022	0.21	0.009	0.2	0.009	0.037	0.009
ELAV-like protein 1	Mucosal	0.0001	0.004	0.0017	0.004	0.097	0.28	0.18
	Submucosal	0.00033	0.0082	0.01	0.4	0.055	0.0082	0.0051
Electron transfer flavoprotein subunit beta	Mucosal	0.00095	0.0078	0.0078	0.0043	0.45	0.0078	0.094
	Submucosal	0.0001	0.00057	< 0.0001	0.02	0.0014	0.028	0.011
Elongation factor 2	Mucosal	0.00046	0.06	0.0056	0.0086	0.12	0.0001	0.024
	Submucosal	0.0001	0.86	0.39	0.34	0.061	< 0.0001	0.00068
Endoplasmic reticulum resident protein 44	Mucosal	0.0001	0.01	0.01	0.025	0.87	0.01	0.11
	Submucosal	0.002	0.0087	0.027	0.05	0.32	0.074	0.1
Endoplasmin	Mucosal	0.0001	0.0001	0.0001	0.019	0.0092	0.0001	0.0001
	Submucosal	0.0001	0.00089	0.069	0.0031	< 0.0001	< 0.0001	0.27
Eukaryotic translation initiation factor 3 subunit A	Mucosal	0.00095	0.016	0.016	0.025	0.87	0.87	0.52
	Submucosal	0.00058	0.048	0.0088	0.13	0.006	0.85	0.0088
Eukaryotic translation initiation factor 3 subunit B	Mucosal	0.0001	0.0033	0.0046	0.0046	0.6	0.14	0.71
	Submucosal	0.002	0.0017	0.0017	0.12	0.22	0.085	0.0017
Eukaryotic translation initiation factor 3 subunit I	Mucosal	0.00096	0.05	0.05	0.05	0.081	0.05	0.05
	Submucosal	0.003	1	0.016	0.25	0.0039	0.52	0.025
Exportin-1	Mucosal	0.001	0.025	0.01	0.0082	0.078	0.02	0.47
	Submucosal	0.003	0.076	0.016	0.12	0.028	0.25	0.009
Far upstream element-binding protein 2	Mucosal	0.0014	0.0032	0.0065	0.0052	0.089	0.41	0.0052
	Submucosal	0.0001	0.00021	< 0.0001	0.0039	0.0023	0.97	0.017
Fatty acid synthase	Mucosal	0.0001	0.92	0.76	0.001	0.53	0.0001	0.0001
	Submucosal	0.0001	0.00021	0.0029	0.17	0.13	< 0.0001	< 0.0001
Fatty acid-binding protein, adipocyte	Mucosal	0.0001	0.75	0.11	0.0039	0.025	0.0039	0.0039
	Submucosal	0.0001	0.0065	0.0039	0.016	0.0039	0.0039	0.0039
Ferritin light chain 1	Mucosal	0.00014	0.0017	0.018	0.0088	0.34	0.048	0.22
	Submucosal	0.0001	0.0039	0.0039	0.055	0.093	0.13	0.016
Fibronectin	Mucosal	0.0001	0.021	0.021	0.021	0.15	0.021	0.021
	Submucosal	0.0001	< 0.0001	< 0.0001	0.009	< 0.0001	< 0.0001	< 0.0001
Filamin-C	Mucosal	0.0001	0.0001	0.0001	0.0001	0.1	0.0001	0.0001
	Submucosal	0.0001	< 0.0001	< 0.0001	0.58	< 0.0001	0.0017	< 0.0001
Fructose-bisphosphate aldolase B	Mucosal	0.0001	0.0019	0.0019	0.0019	0.55	0.24	0.57
	Submucosal	0.0001	0.00078	0.00078	0.0003	0.0023	0.0039	0.92
Gamma-glutamyl hydrolase	Mucosal	0.00081	0.12	0.028	0.46	0.009	0.009	0.009
	Submucosal	0.0001	0.009	0.009	0.035	0.009	0.009	0.12
Glutamine--fructose-6-phosphate aminotransferase [isomerizing] 1	Mucosal	0.004	0.052	0.0036	0.023	0.00029	0.0042	0.0025
	Submucosal	0.0001	0.00016	0.0082	0.11	0.00016	0.00021	0.0015
Glycerol-3-phosphate dehydrogenase [NAD(+)], cytoplasmic	Mucosal	0.002	0.025	0.025	0.035	0.013	0.013	0.34
	Submucosal	0.0001	0.009	0.009	0.093	0.016	0.016	0.028
Glycine--tRNA ligase	Mucosal	0.003	0.013	0.027	0.017	0.1	0.45	0.35
	Submucosal	0.0002	0.0051	0.0039	0.12	0.045	0.0065	0.0039
Guanine nucleotide-binding protein subunit beta-2-like 1	Mucosal	0.002	0.013	0.013	0.013	0.041	0.025	0.22
	Submucosal	0.0001	0.017	0.00018	0.05	0.00044	0.061	0.00021
Haptoglobin	Mucosal	0.0001	0.009	0.009	0.009	0.009	0.009	0.037
	Submucosal	0.0001	0.0039	0.0039	0.01	0.0039	0.0039	0.0039
Heat shock protein 75 kDa, mitochondrial	Mucosal	0.0001	0.0017	0.0017	0.0027	0.025	0.013	0.61
	Submucosal	0.00017	0.0039	0.0039	0.12	0.2	0.045	0.0065
Heat shock protein beta-1	Mucosal	0.0031	0.018	0.28	0.85	0.0017	0.0017	0.0017
	Submucosal	0.0001	0.0017	0.0017	0.28	0.0017	0.0017	0.0017
Histone H1.0	Mucosal	0.002	0.05	0.05	0.83	0.05	0.05	0.05
	Submucosal	0.001	0.51	0.05	0.51	0.05	0.05	0.05
Hydroxymethylglutaryl-CoA synthase, mitochondrial	Mucosal	0.0001	0.00078	0.012	0.00078	0.021	0.00078	0.00078
	Submucosal	0.0001	0.0039	0.037	0.6	0.0039	0.0039	0.016
Importin subunit beta-1	Mucosal	0.003	0.00069	0.026	0.44	0.00041	0.0001	0.00012
	Submucosal	0.0001	< 0.0001	0.00016	0.021	0.63	0.00014	0.0013
Importin-7	Mucosal	0.0001	0.0039	0.0039	0.0039	0.42	0.045	0.2
	Submucosal	0.00011	0.0065	0.0065	0.021	0.016	0.11	0.055
Inorganic pyrophosphatase	Mucosal	0.0001	0.00035	0.0017	0.00035	0.00035	0.00035	0.00035
	Submucosal	0.00093	0.29	0.00078	0.83	0.031	0.014	0.34
Isovaleryl-CoA dehydrogenase, mitochondrial	Mucosal	0.005	0.11	0.01	0.01	0.0082	0.0051	0.02
	Submucosal	0.00028	0.0015	0.00035	0.076	0.019	0.047	0.31
Lamin-B2	Mucosal	0.00019	0.012	0.0031	0.22	0.18	0.0001	0.0001
	Submucosal	0.0001	0.73	< 0.0001	0.25	< 0.0001	< 0.0001	0.00019
Leiomodin-1	Mucosal	0.00076	0.021	0.19	0.021	0.083	0.03	0.021
	Submucosal	0.0001	0.00035	0.00035	0.28	0.0054	0.013	0.00035
Leucine-rich PPR motif-containing protein, mitochondrial	Mucosal	0.0001	0.0018	0.0018	0.0014	0.026	0.18	0.67
	Submucosal	0.0001	0.00021	0.0014	0.51	< 0.0001	0.00014	0.12
Maleylacetoacetate isomerase	Mucosal	0.002	0.25	0.028	0.016	0.047	0.009	0.009
	Submucosal	0.002	0.043	0.39	0.076	0.043	0.021	0.021
MCG13663, isoform CRA_a	Mucosal	0.0001	0.0016	0.0046	0.0033	0.059	0.027	0.37
	Submucosal	0.0001	0.01	0.17	0.44	0.0039	0.0039	0.3
Mucin-2 (Fragments)	Mucosal	0.0001	0.00084	0.0001	0.0001	0.0015	0.0001	0.0001
	Submucosal	0.0001	0.00035	0.00035	0.39	0.0023	0.00035	0.69
Murinoglobulin-1	Mucosal	0.0001	0.92	0.00044	0.057	0.0001	0.00024	0.0001
	Submucosal	0.0001	0.00077	0.47	0.15	0.017	0.00016	0.00051
Myosin-14	Mucosal	0.0001	0.0001	0.0001	0.0001	0.7	0.0001	0.0001
	Submucosal	0.0001	< 0.0001	< 0.0001	0.03	< 0.0001	< 0.0001	< 0.0001
Na(+)/H(+) exchange regulatory cofactor NHE-RF1	Mucosal	0.00087	0.037	0.01	0.055	0.63	0.016	0.0082
	Submucosal	0.0001	0.021	0.19	0.12	0.021	0.021	0.021
NADH dehydrogenase [ubiquinone] flavoprotein 2, mitochondrial	Mucosal	0.006	0.25	0.35	0.016	0.75	0.009	0.009
	Submucosal	0.00097	0.34	0.0039	0.13	0.0039	0.0082	0.26
NADH dehydrogenase [ubiquinone] iron-sulfur protein 2, mitochondrial	Mucosal	0.0001	0.018	0.018	0.006	0.75	0.013	0.064
	Submucosal	0.0001	0.009	0.009	0.05	0.047	0.25	0.028
NADH dehydrogenase [ubiquinone] iron-sulfur protein 3, mitochondrial	Mucosal	0.00045	0.0087	0.012	0.0016	0.96	0.00078	0.00078
	Submucosal	0.0001	0.11	0.0017	0.05	0.0017	0.0017	0.0017
NADH-ubiquinone oxidoreductase 75 kDa subunit, mitochondrial	Mucosal	0.0001	0.23	0.018	0.0001	0.00011	0.0001	0.0001
	Submucosal	0.0001	0.12	< 0.0001	0.009	< 0.0001	< 0.0001	0.00013
Neutral alpha-glucosidase AB	Mucosal	0.0016	0.0044	0.02	0.013	0.048	0.001	0.25
	Submucosal	0.002	0.019	0.0052	0.85	0.94	0.0041	0.00051
Nicastrin	Mucosal	0.0001	0.021	0.021	0.021	0.89	0.021	0.021
	Submucosal	0.001	0.39	0.021	0.35	0.021	0.021	0.25
Nicotinamide phosphoribosyltransferase	Mucosal	0.001	0.021	0.021	0.021	0.25	0.083	0.39
	Submucosal	0.001	0.05	0.05	0.076	0.05	0.05	0.28
Nidogen-1	Mucosal	0.00057	0.94	0.049	0.054	0.00067	0.00033	0.00018
	Submucosal	0.0043	0.16	0.45	0.05	0.98	0.042	0.051
Nucleobindin-1	Mucosal	0.00038	0.0083	0.022	0.24	0.024	0.0001	0.0001
	Submucosal	0.0001	< 0.0001	< 0.0001	0.11	< 0.0001	0.0035	< 0.0001
Omega-amidase NIT2	Mucosal	0.001	0.05	0.05	0.05	0.51	0.05	0.05
	Submucosal	0.00053	0.009	0.009	0.19	0.6	0.009	0.047
Ornithine aminotransferase, mitochondrial	Mucosal	0.0001	0.00021	0.0019	0.00067	0.00016	0.00029	0.00038
	Submucosal	0.00014	0.0019	0.43	0.15	0.0021	0.61	0.0041
Pancreatic alpha-amylase	Mucosal	0.0001	0.021	0.15	0.021	0.021	0.021	0.021
	Submucosal	0.0001	0.00035	0.00035	0.029	0.00035	0.015	0.00035
Pancreatic triacylglycerol lipase	Mucosal	0.00017	0.021	0.25	0.021	0.021	0.021	0.021
	Submucosal	0.0001	0.0017	0.0017	0.016	0.0017	0.44	0.0017
PCTP-like protein	Mucosal	0.00013	0.016	0.009	0.009	0.037	0.35	0.037
	Submucosal	0.002	0.021	0.021	0.12	0.021	0.25	0.083
PDZ and LIM domain protein 3	Mucosal	0.0001	0.021	0.021	0.083	0.043	0.043	0.021
	Submucosal	0.0001	0.34	0.75	0.12	0.96	0.00094	0.0016
Peroxiredoxin-5, mitochondrial	Mucosal	0.0039	0.12	0.12	0.016	0.047	0.009	0.009
	Submucosal	0.0001	0.078	0.016	0.05	0.055	0.0039	0.016
Phosphatidylethanolamine-binding protein 1	Mucosal	0.0035	0.21	0.076	0.009	0.25	0.028	0.06
	Submucosal	0.0059	0.009	0.009	0.83	0.6	0.6	0.46
Phosphoglucomutase-like protein 5	Mucosal	0.0001	0.00033	0.0011	0.0001	0.22	0.0001	0.0001
	Submucosal	0.0001	< 0.0001	< 0.0001	0.47	< 0.0001	< 0.0001	< 0.0001
Polymerase I and transcript release factor	Mucosal	0.001	0.006	0.0088	0.064	0.48	0.025	0.097
	Submucosal	0.0001	0.0028	< 0.0001	0.12	0.011	0.00091	< 0.0001
Potassium-transporting ATPase alpha chain 2	Mucosal	0.0001	0.001	0.076	0.00016	0.00088	0.00016	0.00016
	Submucosal	0.0001	0.05	0.05	0.14	0.05	0.05	0.05
Prelamin-A/C	Mucosal	0.0001	0.0001	0.0001	0.0001	0.16	0.0001	0.0001
	Submucosal	0.0001	< 0.0001	0.0028	0.19	< 0.0001	0.13	< 0.0001
Prohibitin	Mucosal	0.00039	0.058	0.07	0.0054	0.69	0.00035	0.00035
	Submucosal	0.0001	0.00022	< 0.0001	0.009	0.065	0.065	0.36
ProSAAS	Mucosal	0.0001	0.021	0.021	0.021	0.021	0.021	0.77
	Submucosal	0.0001	0.021	0.021	0.12	0.021	0.021	0.15
Prostaglandin reductase 2	Mucosal	0.003	0.05	0.05	0.05	0.13	0.05	0.05
	Submucosal	0.001	0.021	0.021	0.12	1	0.25	0.77
Protein arginine N-methyltransferase 1	Mucosal	0.001	0.05	0.05	0.05	0.05	0.05	0.51
	Submucosal	0.0052	0.35	0.3	0.12	0.022	0.12	0.076
Protein disulfide-isomerase A3	Mucosal	0.001	0.024	0.028	0.0084	0.96	0.00088	0.021
	Submucosal	0.0016	0.75	0.12	0.12	0.35	0.0068	0.0025
Protein transport protein Sec31A	Mucosal	0.0028	0.078	0.42	0.0065	0.11	0.025	0.0039
	Submucosal	0.004	0.35	0.17	0.12	0.46	0.009	0.028
Protein-glutamine gamma-glutamyltransferase 2	Mucosal	0.0003	0.05	0.05	0.05	0.05	0.05	0.05
	Submucosal	0.0001	0.55	0.00011	0.12	< 0.0001	< 0.0001	0.42
Protein-glutamine gamma-glutamyltransferase E	Mucosal	0.0001	0.057	0.0098	0.0001	0.014	0.0001	0.0001
	Submucosal	0.0001	0.17	< 0.0001	1	< 0.0001	< 0.0001	< 0.0001
Prothymosin alpha	Mucosal	0.001	0.05	0.05	0.05	0.05	0.05	0.51
	Submucosal	0.00066	0.05	0.05	0.12	0.05	0.05	0.05
Puromycin-sensitive aminopeptidase	Mucosal	0.002	0.0035	0.0032	0.061	0.4	0.0001	0.0001
	Submucosal	0.00028	0.0039	0.094	0.13	0.00091	0.15	0.028
Pyrethroid hydrolase Ces2e	Mucosal	0.001	0.05	0.05	0.05	0.13	0.13	0.05
	Submucosal	0.001	0.05	0.05	0.047	0.05	0.05	0.05
Sarcolemmal membrane-associated protein	Mucosal	0.00087	0.92	0.67	0.018	0.036	0.00078	0.0011
	Submucosal	0.0001	< 0.0001	< 0.0001	0.32	0.023	0.75	0.081
Sarcoplasmic/endoplasmic reticulum calcium ATPase 2	Mucosal	0.0005	0.031	0.085	0.0017	0.052	0.00035	0.00035
	Submucosal	0.0001	< 0.0001	< 0.0001	0.0012	0.035	0.12	0.06
Seminal vesicle secretory protein 5	Mucosal	0.001	0.05	0.05	0.83	0.05	0.05	0.05
	Submucosal	0.00063	0.05	0.05	0.44	0.05	0.05	0.05
Serrate RNA effector molecule homolog	Mucosal	0.003	0.05	0.05	0.05	0.51	0.05	0.51
	Submucosal	0.00049	0.0051	0.87	0.66	0.0065	0.34	0.0065
Serum deprivation-response protein	Mucosal	0.0046	0.021	0.021	0.021	0.77	0.39	0.77
	Submucosal	0.00014	0.082	0.00067	0.12	0.07	0.041	0.00088
Spectrin beta chain, non-erythrocytic 1	Mucosal	0.0001	0.0013	0.00024	0.0001	0.01	0.0001	0.0001
	Submucosal	0.0001	0.12	< 0.0001	0.83	< 0.0001	0.47	< 0.0001
Splicing factor, proline- and glutamine-rich	Mucosal	0.00011	0.0016	0.0087	0.0033	0.12	0.34	0.074
	Submucosal	0.0009	0.013	0.013	0.12	0.61	0.0049	0.025
Superoxide dismutase [Cu-Zn]	Mucosal	0.0001	0.0017	0.0017	0.0017	0.22	0.004	0.006
	Submucosal	0.005	0.016	0.016	0.05	0.35	0.75	0.25
Suppressor of tumorigenicity 14 protein homolog	Mucosal	0.0001	0.016	0.009	0.022	1	0.016	0.028
	Submucosal	0.001	0.081	0.05	0.51	0.05	0.38	0.51
Synemin	Mucosal	0.00036	0.89	0.3	0.0038	0.00062	0.0001	0.0001
	Submucosal	0.0001	< 0.0001	< 0.0001	1	< 0.0001	< 0.0001	0.00025
Tax_Id	Mucosal	0.0001	0.00078	0.00078	0.0063	0.6	0.00078	0.00078
	Submucosal	0.0001	< 0.0001	0.0056	0.05	0.00014	0.47	< 0.0001
Tax_Id	Mucosal	0.0001	0.52	0.0039	0.0039	0.0039	0.0039	0.0039
	Submucosal	0.0001	< 0.0001	< 0.0001	0.05	< 0.0001	< 0.0001	0.00044
T-complex protein 1 subunit delta	Mucosal	0.0001	0.0025	0.0025	0.0025	0.034	0.011	0.0065
	Submucosal	0.0001	0.16	0.0019	0.12	0.0044	< 0.0001	0.00094
T-complex protein 1 subunit eta	Mucosal	0.004	0.023	0.039	0.017	0.017	0.071	0.061
	Submucosal	0.00011	0.002	0.14	0.12	0.9	0.0095	0.014
Threonine--tRNA ligase, cytoplasmic	Mucosal	0.0034	0.035	0.025	0.025	0.041	0.65	0.041
	Submucosal	0.0035	1	0.043	0.44	0.043	0.25	0.083
Transgelin	Mucosal	0.005	0.036	0.086	0.086	0.46	0.018	0.66
	Submucosal	0.0001	0.00034	< 0.0001	0.12	< 0.0001	< 0.0001	< 0.0001
Trifunctional enzyme subunit alpha, mitochondrial	Mucosal	0.002	0.01	0.44	0.035	0.00074	0.027	0.00085
	Submucosal	0.0001	0.001	0.00016	0.00021	0.24	< 0.0001	< 0.0001
Trifunctional enzyme subunit beta, mitochondrial	Mucosal	0.0012	0.0063	0.036	0.046	0.016	0.0023	0.4
	Submucosal	0.0001	0.79	0.093	0.16	0.059	0.00078	0.0011
Triosephosphate isomerase	Mucosal	0.0001	0.023	0.028	0.00051	0.88	0.00088	0.0052
	Submucosal	0.00085	0.00038	0.0073	0.12	0.11	0.79	0.2
UMP-CMP kinase	Mucosal	0.0021	0.11	0.078	0.01	0.52	0.025	0.15
	Submucosal	0.002	0.0039	0.0065	0.44	0.0039	0.0039	0.34
Unconventional myosin-Ia	Mucosal	0.0001	0.00023	0.0001	0.00027	0.0001	0.73	0.0001
	Submucosal	0.0001	< 0.0001	0.0002	0.19	0.0012	0.42	0.028
Vinculin	Mucosal	0.0001	0.0001	0.0012	0.0001	0.0001	0.0001	0.0001
	Submucosal	0.0001	< 0.0001	< 0.0001	0.7	< 0.0001	0.00021	0.1
Voltage-dependent anion-selective channel protein 1	Mucosal	0.0013	0.27	0.065	0.4	0.00017	0.015	0.0001
	Submucosal	0.0001	0.12	0.017	0.12	0.02	0.00013	0.52
